# Supplementary material for: A Mechanistic Model of PCR for Accurate Quantification of Quantitative PCR Data
Source: PubMed Central journal article supplement (PMC2930010; doi:10.1371/journal.pone.0012355), 2010-08-30

```

(*****)
(* This Mathematica notebook contains code written for fitting qPCR data with MAK2, the mechanistic 2 *)
(* parameter model derived from the mass action kinetics of PCR and trials of fitting qPCR data with *)
(* MAK2 curves. *)
(* *)
(* The 'd0' values resulting from the trials are used to develop the plots in figure 3 of the MAK2 paper. *)
(* *)
(***** Written by Gregory Boggy (November 2009), based on optimization code written Avi Mayo *****)
(*****)

```

dataCTfunc is a function to define the data to be fitted. The variable 'data' is the name of the variable to be evaluated. The variable 'frac' defines the fraction of the maximum signal the threshold for excluding data is set. Determination of the data to fit is described in Materials and Methods of the MAK2 article.

```

dataCTfunc[data_] :=
{
  b = Abs[data[[1, 2]]] + 0.0001;
  datadiff = {};
  For[i = 1, i < Length[data], i++;
    diff = data[[i, 2]] - data[[i - 1, 2]]; datadiff = Append[datadiff, diff]];
  datadiffdiff = {};
  avdiffdiff = {};
  For[i = 1, i < Length[data] - 1, i++; diffdiff = datadiff[[i]] - datadiff[[i - 1]];
    datadiffdiff = Append[datadiffdiff, diffdiff]];
  For[i = 1, i < Length[data] - 2, i++; av = datadiffdiff[[i]] + datadiffdiff[[i - 1]];
    avdiffdiff = Append[avdiffdiff, av]];
  pos = Position[avdiffdiff, Max[avdiffdiff]][[1]][[1]];
  CT = Position[datadiffdiff, Max[datadiffdiff[[pos ;; pos + 1]]]][[1]][[1]] + 2;
  data[[1 ;; CT]][[1]];
}

```

Now, we define a cost function. It is set as the residual sum of squares. The variable 'yList' is the list of DNA values and the variable 'intensity' is a list of the corresponding fluorescence intensity values. These lists are populated in each iteration of optimization when a simulation with the current parameter values is performed. The for loop performs this operation. The variable q is the current dsDNA value and d is the value for the previous cycle. The data used to evaluate the cost function is determined by 'dataCTfunc' above.

```

c[x : {_?NumberQ ..}] := TimeConstrained[Module[{}, {
  yList = {d0} /. Thread[par -> x];
  intensity = {};
  q = d + k * Log[1 + d / k] /. Thread[par -> x];
  For[count = 1, count < Length[dataCT] + 1, count++, y1 = q /. d -> yList[[count]];
    yList = Append[yList, y1];
    intensity = Append[intensity, (y1 + base) /. Thread[par -> x]]];
  Total[(#[[2]] - intensity[[#[[1]]]])^2 & /@ dataCT]][[1]], 2];

```

Here, we define the optimization method. It is set to Nelder-Mead. Initialize number of loops with 'NumberOfLoops'. If the optimization algorithm gets stuck in a local minimum, a new loop will begin and start optimizing from a new point. Set 'PertuAmp', the variable that affects the window size for an initial parameter value for a new loop.

```

method =
  {
    {"DifferentialEvolution", "SearchPoints" → 400, "RandomSeed" → RandomInteger[{1, 100}]},
    {"SimulatedAnnealing", "PerturbationScale" → 3, "BoltzmannExponent" →
      Function[{i, df, f0}, - $\frac{df}{e^{i/10}}$ ], "RandomSeed" → RandomInteger[{1, 100}]},
    {"NelderMead", "ShrinkRatio" → 0.95, "ContractRatio" → 0.95,
      "ReflectRatio" → 1.5, "RandomSeed" → RandomInteger[{1, 100}]},
    {"Automatic", "RandomSeed" → RandomInteger[{1, 100}]}];
MethodType = 3;
NumberOfLoops = 0;
PertuAmp = 0.9; (*you can fix amplitude of perturbation
or make it a decreasing function of the loop number  $\frac{1}{10^{\text{NumberOfLoops}}}$  *)

```

MAK2 is the main function. The variables 'data' and 'frac' are passed to 'dataCTfunc' and 'dirname' is the name of the directory that data is written to--a new folder is made for each experimental well.

The three parameters and corresponding constraints must be defined. An initial parameter set is also defined with "current\_fit". Maximum number of optimization iterations are set with 'MaxIter'. No new loops (see below) will be started after this value has been reached.

If the current cost function value is lower than any previous value, then the display is updated.

```

MAK2[data_] :=
{SelectionMove[nb, All, GeneratedCell];
 coutlow = 1;
 dataCT = dataCTfunc[data];

par = {d0, k, base}; dhigh = .01; dlow = 10^(-12);
constraints = Join[{d0 < dhigh, d0 > dlow,
  k < Max[data[[All, 2]]], k > 0.001, base > -Abs[1.1 * b], base < Abs[1.1 * b]};
{d0 → dlow * 100, k → 1.0, base → b}[[All, 2]] >> "current_fit";
MaxIter = 5000;

ShowStatus[status_] := LinkWrite[$ParentLink,
  SetNotebookStatusLine[FrontEnd`EvaluationNotebook[], ToString[status]]];
nb = EvaluationNotebook[];
spar = ToString /@ par;

i = 0;
NumberOfLoops = 0;
While[i < MaxIter, NumberOfLoops++;

  curr = ReadList["current_fit"][[1]];
  v = Flatten[#, 1] & /@ Transpose[{par, N[{1 - PertuAmp, 1 + PertuAmp} (#)] & /@ Abs[curr]}];
  rt = SessionTime[];
  NMinimize[{c[par], constraints}, v, Method → method[[3]],
    MaxIterations → 1000, StepMonitor ⇒ (par >> "current_fit");
    cout = N[Round[c[par] * 10^8] / (10^8)];
    If[cout ≤ coutlow * 0.99999,
      lowoutRoutine = {Module[{st = "c=" <> ToString[N[(c[par])]}] <> " " <> "i=" <>
        ToString[i] <> " " <> "t=" <> ToString[Round[SessionTime[] - rt]] <>
        " " <> "loops=" <> ToString[NumberOfLoops]},
        ShowStatus[st]; NotebookDelete[nb];

      Print[Show[{ListPlot[data, PlotLabel -> st,
        PlotRange → All], ListLinePlot[intensity, PlotRange → All]}]];
      rt = SessionTime[]; Print[Thread[spar → par]]; SelectionMove[
        nb, All, GeneratedCell]; coutlow = cout;];
    i++]];
};

```

Now, we set the filepath and import data from a .csv file. First column of the file should be cycles. The column data are named. Data are transposed with the cycle numbers so that the data for an experimental well is a 2 x n array with column numbers and corresponding fluorescence.

The following data in 'growth.csv' was generated by the authors.

```

filepath = "Desktop/data/";
SetDirectory[filepath];
indata = Import["growth.csv"];
cycle = indata[[All, 1]];

D3data = Transpose[{cycle, indata[[All, 2]]}][[2 ;; 41]];
D4data = Transpose[{cycle, indata[[All, 3]]}][[2 ;; 41]];
D5data = Transpose[{cycle, indata[[All, 4]]}][[2 ;; 41]];
D6data = Transpose[{cycle, indata[[All, 5]]}][[2 ;; 41]];
D7data = Transpose[{cycle, indata[[All, 6]]}][[2 ;; 41]];
D8data = Transpose[{cycle, indata[[All, 7]]}][[2 ;; 41]];
E3data = Transpose[{cycle, indata[[All, 8]]}][[2 ;; 41]];
E4data = Transpose[{cycle, indata[[All, 9]]}][[2 ;; 41]];
E5data = Transpose[{cycle, indata[[All, 10]]}][[2 ;; 41]];
E6data = Transpose[{cycle, indata[[All, 11]]}][[2 ;; 41]];
E7data = Transpose[{cycle, indata[[All, 12]]}][[2 ;; 41]];
E8data = Transpose[{cycle, indata[[All, 13]]}][[2 ;; 41]];

```

What follows are actual trials that can be reevaluated.

**MAK2[D3data]**

c=0.0000729625 i=3627 t=0 loops=4

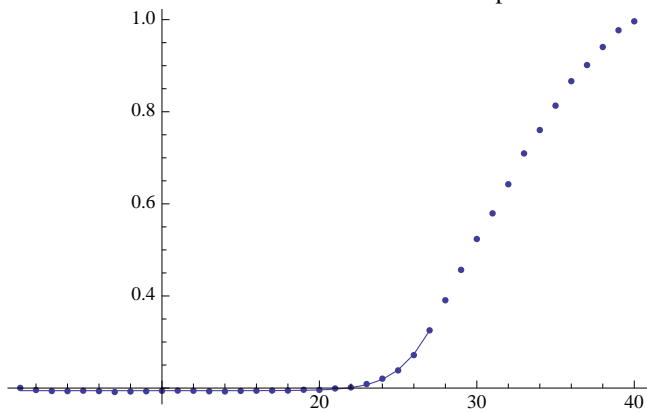

{d0 → 1.59848 × 10<sup>-9</sup>, k → 0.0635667, base → 0.194352}

{Null}

**MAK2[D4data]**

c=0.0000746762 i=4372 t=4 loops=5

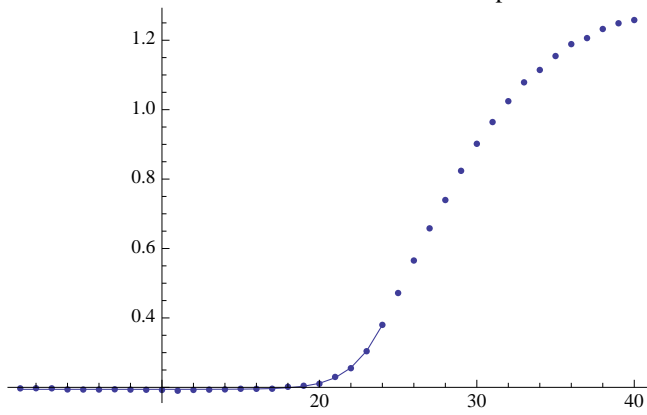

{d0 →  $1.71786 \times 10^{-8}$ , k → 0.102162, base → 0.194352}

{Null}

**MAK2[D5data]**

c=0.0000498731 i=1667 t=1 loops=2

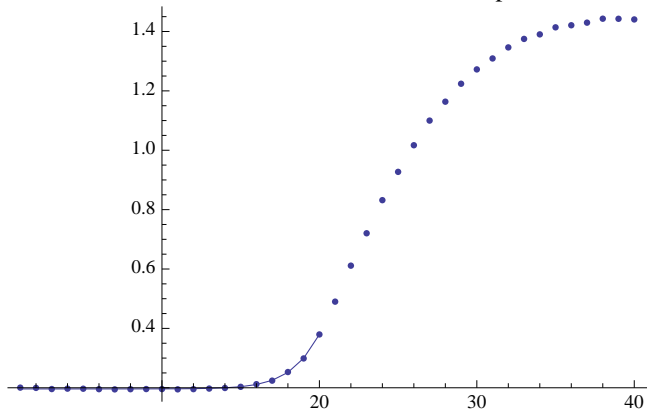

{d0 →  $2.30757 \times 10^{-7}$ , k → 0.162611, base → 0.196127}

{Null}

**MAK2[D6data]**

c=0.0000641951 i=4735 t=12 loops=5

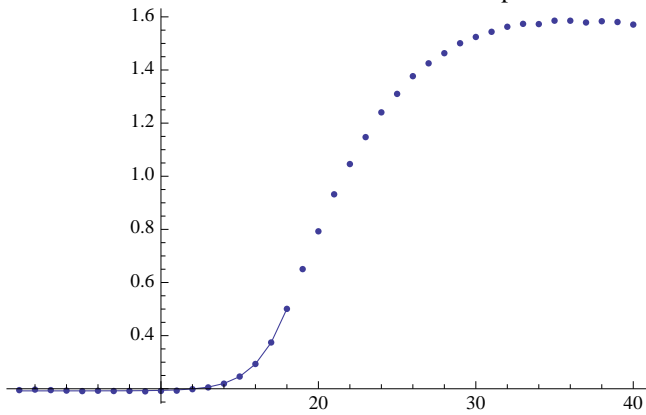

{d0 →  $1.75799 \times 10^{-6}$ , k → 0.188528, base → 0.192083}

{Null}

**MAK2[D7data]**

c=0.0000395248 i=750 t=0 loops=1

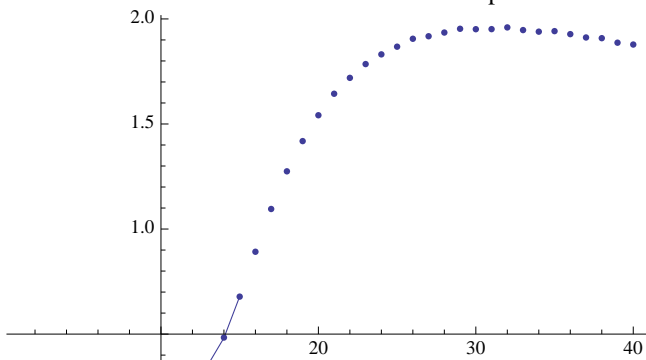

{d0 → 0.0000224502, k → 0.279824, base → 0.195958}

{Null}

**MAK2[D8data]**

c=0.0000618078 i=2608 t=10 loops=2

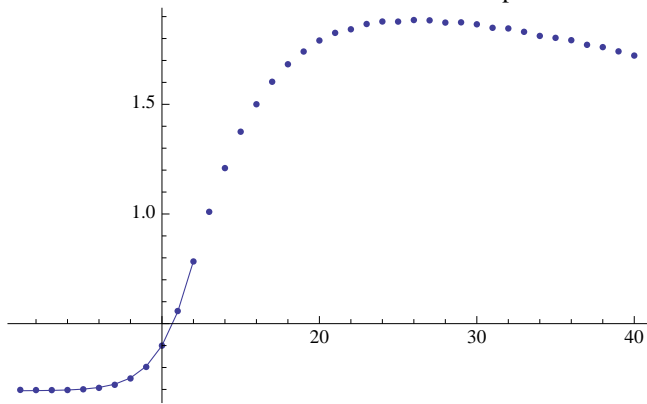

{d0 → 0.000241108, k → 0.279332, base → 0.19366}

{Null}

**MAK2[E3data]**

c=0.000118114 i=458 t=0 loops=1

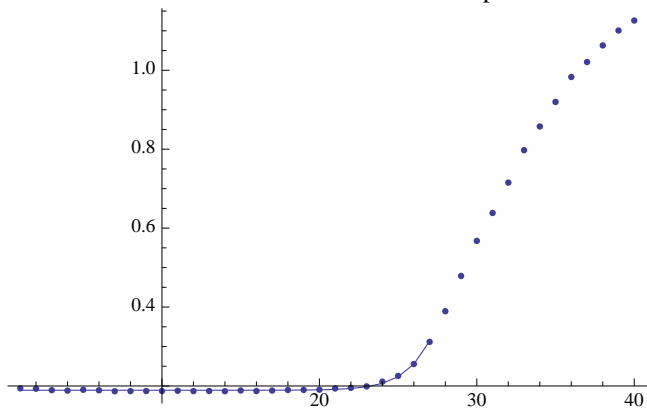

{d0 →  $1.05864 \times 10^{-9}$ , k → 0.233823, base → 0.189163}

{Null}

**MAK2[E4data]**

c=0.0000808018 i=5419 t=14 loops=6

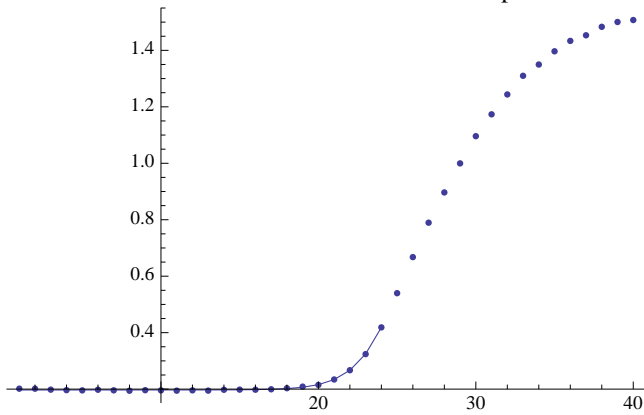

{d0 →  $1.85471 \times 10^{-8}$ , k → 0.159537, base → 0.196981}

{Null}

**MAK2[E5data]**

c=0.0000632837 i=4802 t=2 loops=6

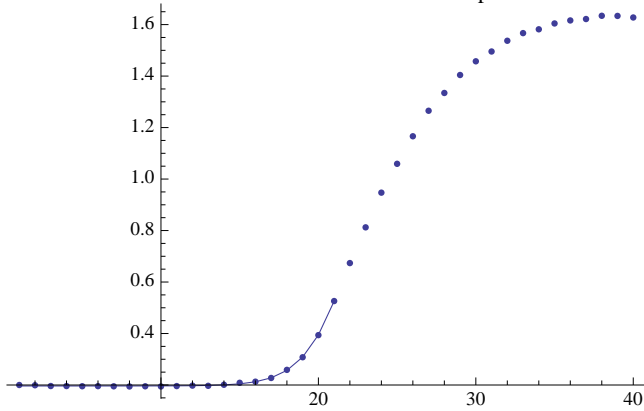

{d0 →  $2.52569 \times 10^{-7}$ , k → 0.16845, base → 0.196262}

{Null}

**MAK2[E6data]**



c=0.0000544133 i=4825 t=3 loops=5

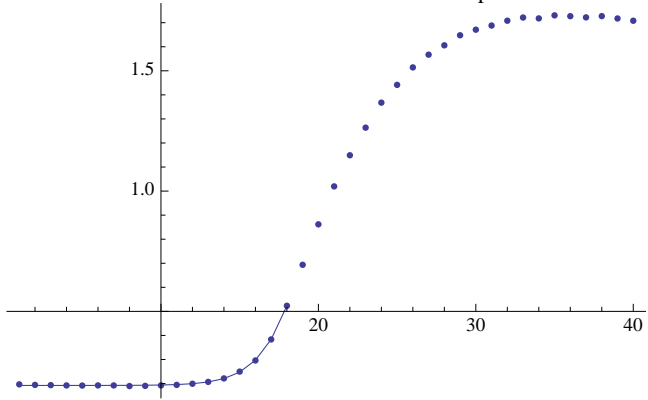

{d0 →  $1.79533 \times 10^{-6}$ , k → 0.230369, base → 0.192131}

{Null}

**MAK2[E7data]**

c=0.0000390335 i=1552 t=0 loops=2

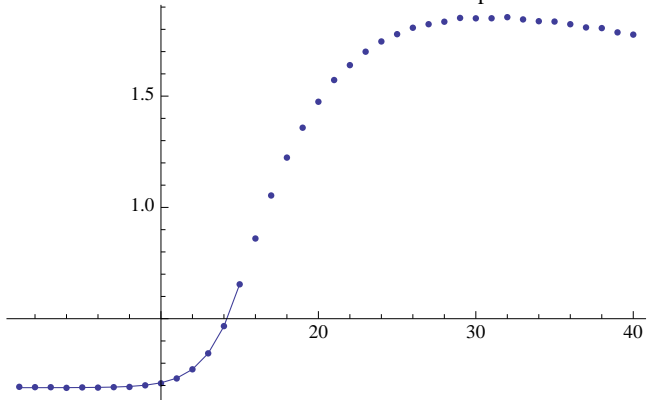

{d0 → 0.0000217174, k → 0.265815, base → 0.190084}

{Null}

**MAK2[E8data]**

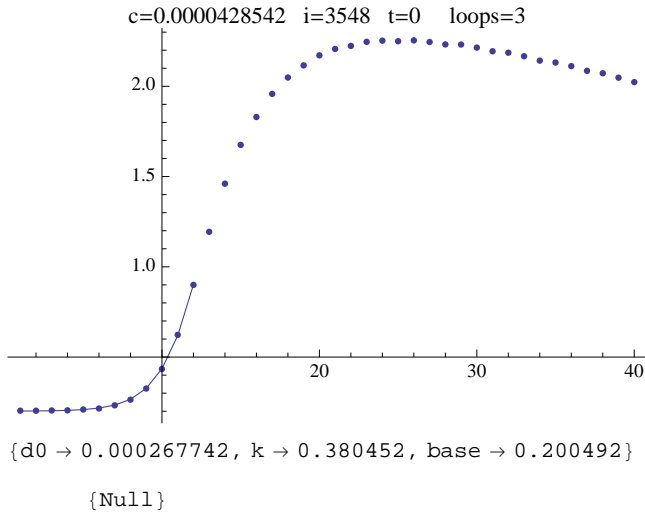

The following are data and trials from the 'rutledge.csv' dataset.

```

indata = Import["rutledge.csv"];
cycle = indata[[All, 1]][[2 ;;]];

X111data = Transpose[{cycle, indata[[All, 3]][[2 ;;]]}];
X112data = Transpose[{cycle, indata[[All, 4]][[2 ;;]]}];
X113data = Transpose[{cycle, indata[[All, 5]][[2 ;;]]}];
X114data = Transpose[{cycle, indata[[All, 6]][[2 ;;]]}];
X121data = Transpose[{cycle, indata[[All, 7]][[2 ;;]]}];
X122data = Transpose[{cycle, indata[[All, 8]][[2 ;;]]}];
X123data = Transpose[{cycle, indata[[All, 9]][[2 ;;]]}];
X124data = Transpose[{cycle, indata[[All, 10]][[2 ;;]]}];
X131data = Transpose[{cycle, indata[[All, 11]][[2 ;;]]}];
X132data = Transpose[{cycle, indata[[All, 12]][[2 ;;]]}];
X133data = Transpose[{cycle, indata[[All, 13]][[2 ;;]]}];
X134data = Transpose[{cycle, indata[[All, 14]][[2 ;;]]}];
X141data = Transpose[{cycle, indata[[All, 15]][[2 ;;]]}];
X142data = Transpose[{cycle, indata[[All, 16]][[2 ;;]]}];
X143data = Transpose[{cycle, indata[[All, 17]][[2 ;;]]}];
X144data = Transpose[{cycle, indata[[All, 18]][[2 ;;]]}];
X151data = Transpose[{cycle, indata[[All, 19]][[2 ;;]]}];
X152data = Transpose[{cycle, indata[[All, 20]][[2 ;;]]}];
X153data = Transpose[{cycle, indata[[All, 21]][[2 ;;]]}];
X154data = Transpose[{cycle, indata[[All, 22]][[2 ;;]]}];
X211data = Transpose[{cycle, indata[[All, 23]][[2 ;;]]}];
X212data = Transpose[{cycle, indata[[All, 24]][[2 ;;]]}];
X213data = Transpose[{cycle, indata[[All, 25]][[2 ;;]]}];
X214data = Transpose[{cycle, indata[[All, 26]][[2 ;;]]}];
X221data = Transpose[{cycle, indata[[All, 27]][[2 ;;]]}];
X222data = Transpose[{cycle, indata[[All, 28]][[2 ;;]]}];

```



```
X452data = Transpose[{cycle, indata[[All, 80]][[2 ;;]]}];
X453data = Transpose[{cycle, indata[[All, 81]][[2 ;;]]}];
X454data = Transpose[{cycle, indata[[All, 82]][[2 ;;]]}];
X511data = Transpose[{cycle, indata[[All, 83]][[2 ;;]]}];
X512data = Transpose[{cycle, indata[[All, 84]][[2 ;;]]}];
X513data = Transpose[{cycle, indata[[All, 85]][[2 ;;]]}];
X514data = Transpose[{cycle, indata[[All, 86]][[2 ;;]]}];
X521data = Transpose[{cycle, indata[[All, 87]][[2 ;;]]}];
X522data = Transpose[{cycle, indata[[All, 88]][[2 ;;]]}];
X523data = Transpose[{cycle, indata[[All, 89]][[2 ;;]]}];
X524data = Transpose[{cycle, indata[[All, 90]][[2 ;;]]}];
X531data = Transpose[{cycle, indata[[All, 91]][[2 ;;]]}];
X532data = Transpose[{cycle, indata[[All, 92]][[2 ;;]]}];
X533data = Transpose[{cycle, indata[[All, 93]][[2 ;;]]}];
X534data = Transpose[{cycle, indata[[All, 94]][[2 ;;]]}];
X541data = Transpose[{cycle, indata[[All, 95]][[2 ;;]]}];
X542data = Transpose[{cycle, indata[[All, 96]][[2 ;;]]}];
X543data = Transpose[{cycle, indata[[All, 97]][[2 ;;]]}];
X544data = Transpose[{cycle, indata[[All, 98]][[2 ;;]]}];
X551data = Transpose[{cycle, indata[[All, 99]][[2 ;;]]}];
X552data = Transpose[{cycle, indata[[All, 100]][[2 ;;]]}];
X553data = Transpose[{cycle, indata[[All, 101]][[2 ;;]]}];
X554data = Transpose[{cycle, indata[[All, 102]][[2 ;;]]}];
X611data = Transpose[{cycle, indata[[All, 103]][[2 ;;]]}];
X612data = Transpose[{cycle, indata[[All, 104]][[2 ;;]]}];
X613data = Transpose[{cycle, indata[[All, 105]][[2 ;;]]}];
X614data = Transpose[{cycle, indata[[All, 106]][[2 ;;]]}];
X621data = Transpose[{cycle, indata[[All, 107]][[2 ;;]]}];
X622data = Transpose[{cycle, indata[[All, 108]][[2 ;;]]}];
X623data = Transpose[{cycle, indata[[All, 109]][[2 ;;]]}];
X624data = Transpose[{cycle, indata[[All, 110]][[2 ;;]]}];
X631data = Transpose[{cycle, indata[[All, 111]][[2 ;;]]}];
X632data = Transpose[{cycle, indata[[All, 112]][[2 ;;]]}];
X633data = Transpose[{cycle, indata[[All, 113]][[2 ;;]]}];
X634data = Transpose[{cycle, indata[[All, 114]][[2 ;;]]}];
X641data = Transpose[{cycle, indata[[All, 115]][[2 ;;]]}];
X642data = Transpose[{cycle, indata[[All, 116]][[2 ;;]]}];
X643data = Transpose[{cycle, indata[[All, 117]][[2 ;;]]}];
X644data = Transpose[{cycle, indata[[All, 118]][[2 ;;]]}];
X651data = Transpose[{cycle, indata[[All, 119]][[2 ;;]]}];
X652data = Transpose[{cycle, indata[[All, 120]][[2 ;;]]}];
X653data = Transpose[{cycle, indata[[All, 121]][[2 ;;]]}];
X654data = Transpose[{cycle, indata[[All, 122]][[2 ;;]]}];

MAK2[X111data]
```

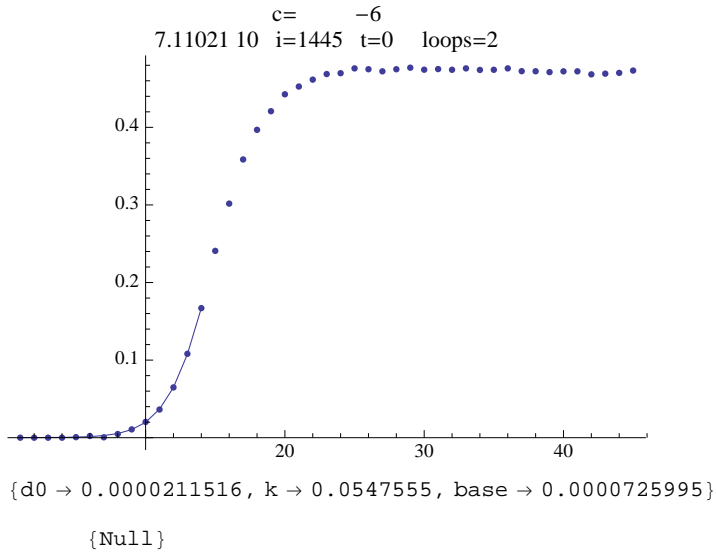

**MAK2[X112data]**

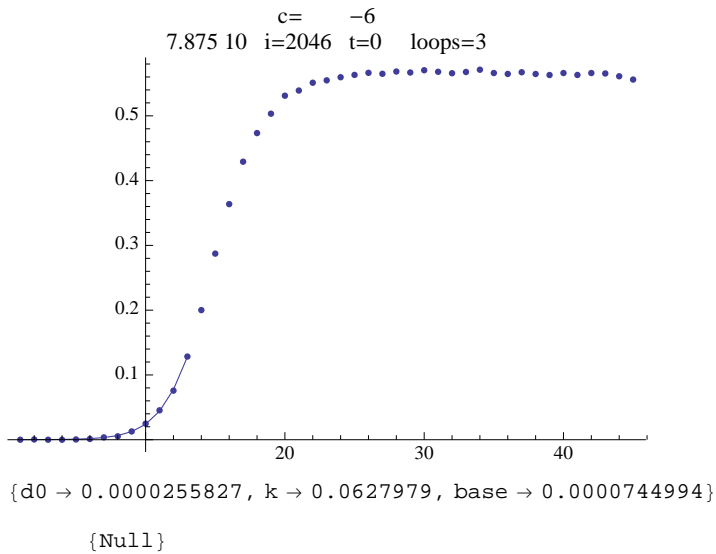

**MAK2[X113data]**

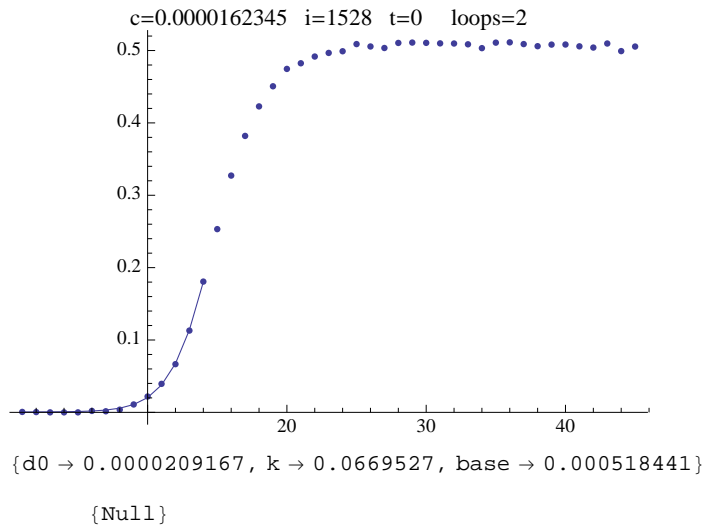

**MAK2[x114data]**

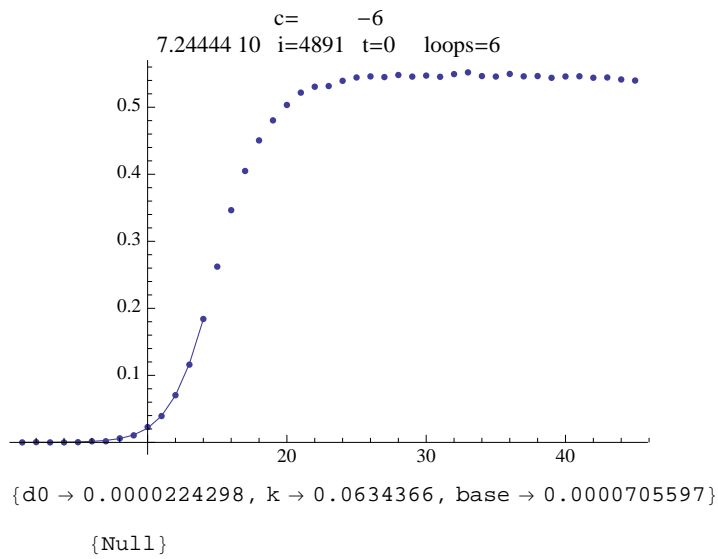

**MAK2[x121data]**

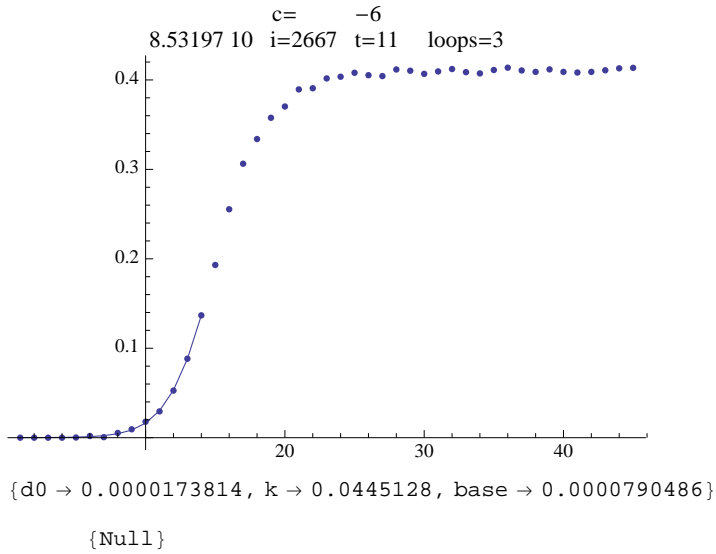

**MAK2[x122data]**

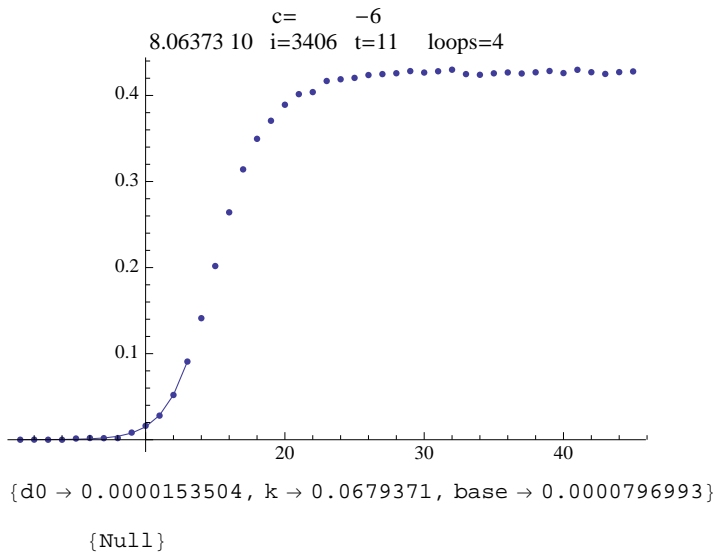

**MAK2[x123data]**

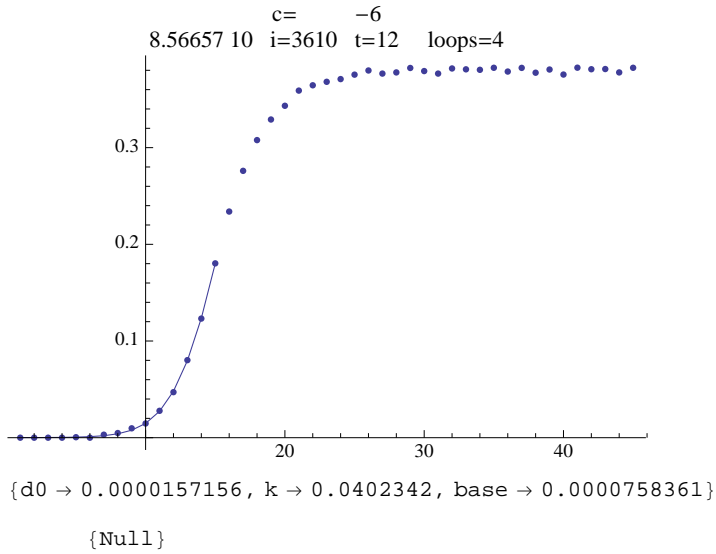

**MAK2[X124data]**

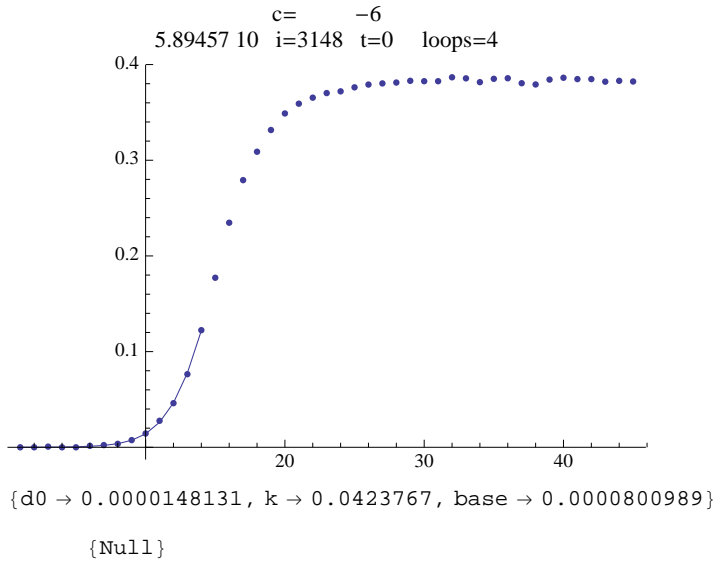

**MAK2[X131data]**



c=0.0000160346 i=5510 t=12 loops=7

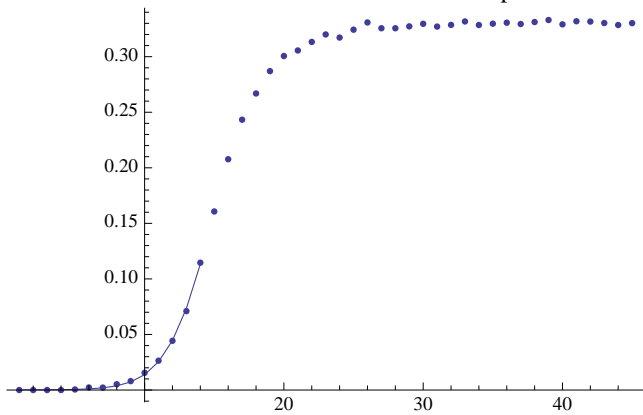

{d0 → 0.0000147834, k → 0.0355564, base → 0.0000841035}

{Null}

**MAK2[x132data]**

c=0.0000109123 i=5176 t=12 loops=6

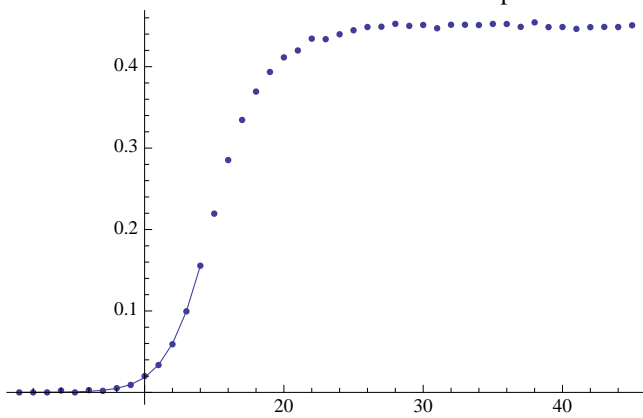

{d0 → 0.0000193173, k → 0.0522334, base → 0.0000758587}

{Null}

**MAK2[x133data]**

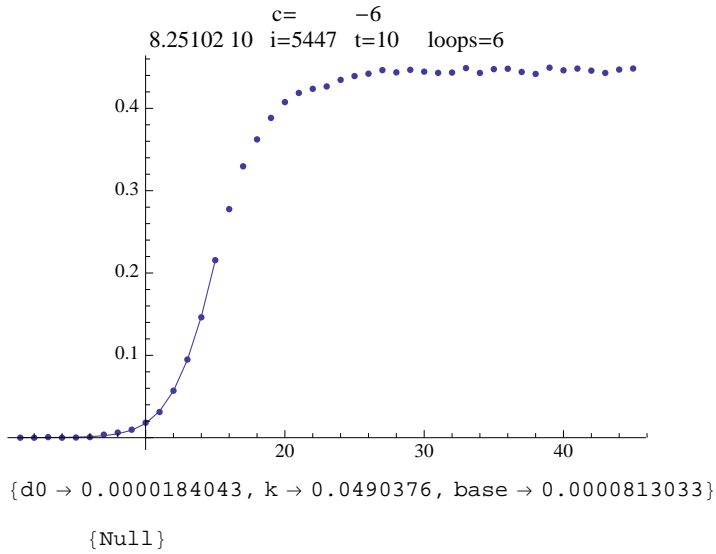

**MAK2[x134data]**

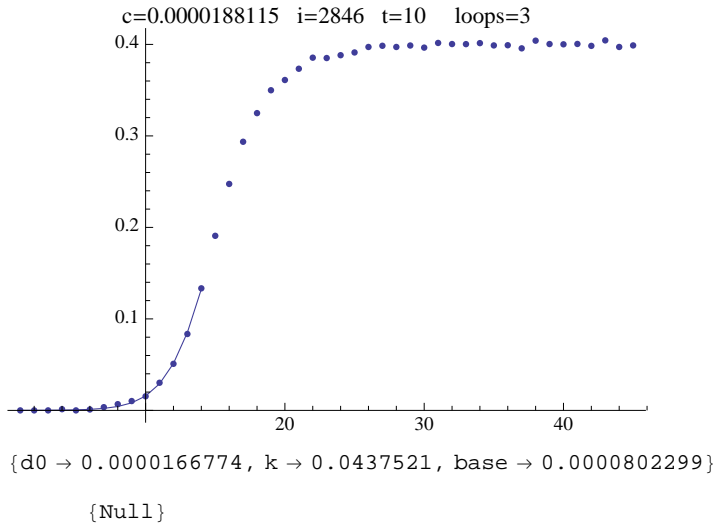

**MAK2[x141data]**

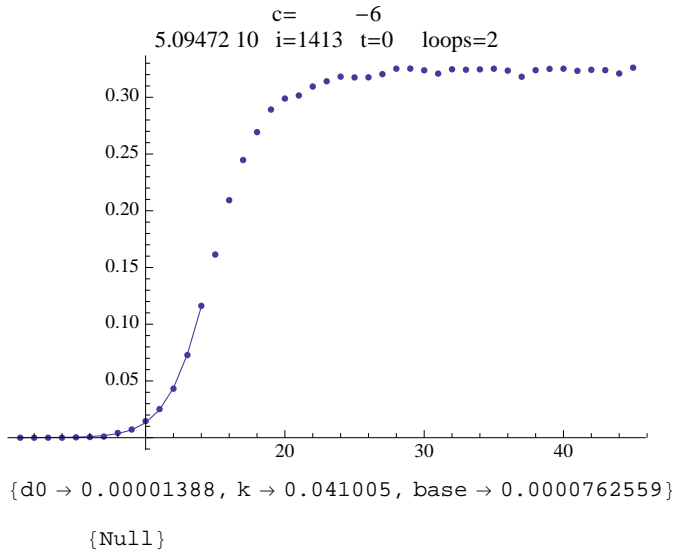

**MAK2[X142data]**

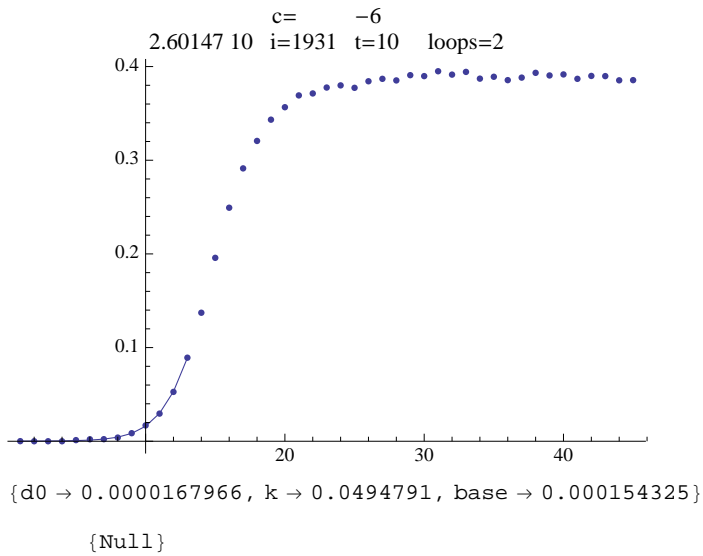

**MAK2[X143data]**

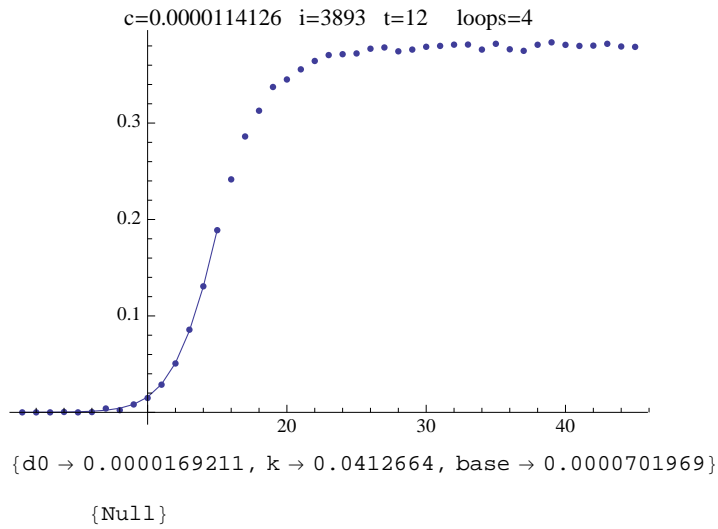

**MAK2[x144data]**

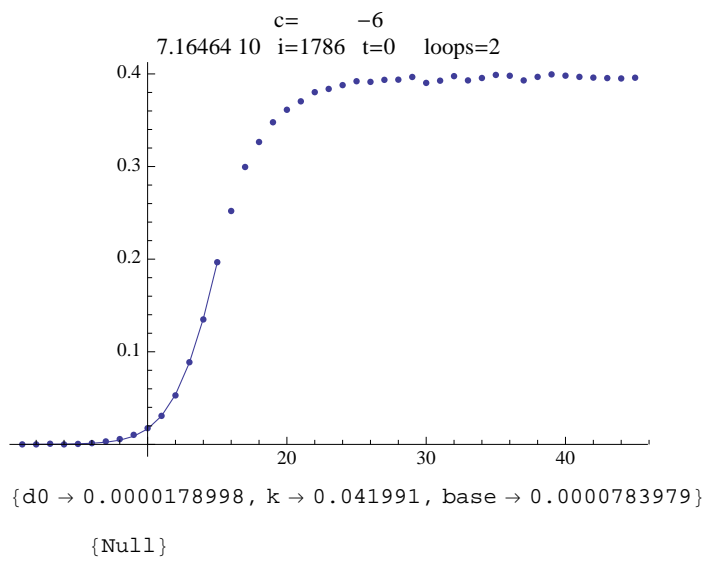

**MAK2[x151data]**

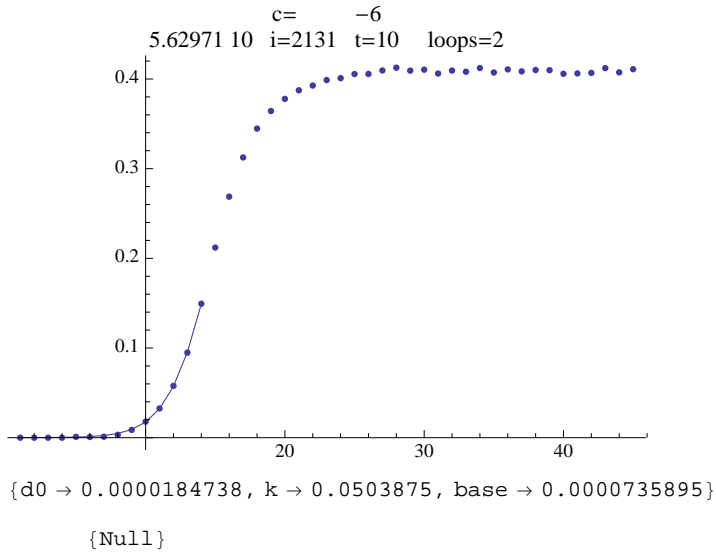

**MAK2[X152data]**

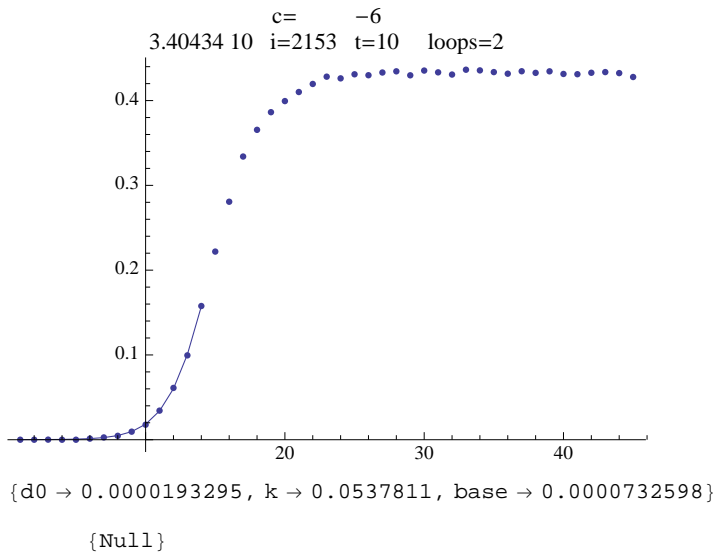

**MAK2[X153data]**

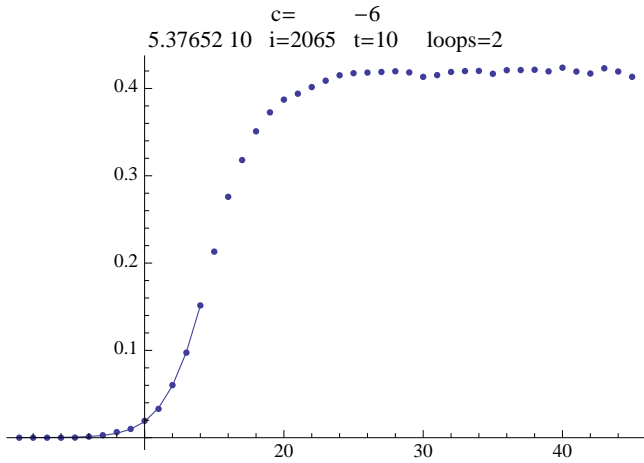

{d0 → 0.0000197776, k → 0.047303, base → 0.0000736628}

{Null}

**MAK2[X154data]**

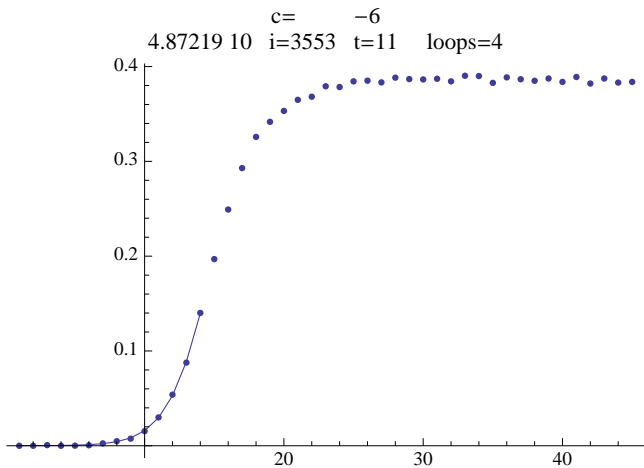

{d0 → 0.0000166967, k → 0.0498706, base → 0.0000797315}

{Null}

**MAK2[X211data]**

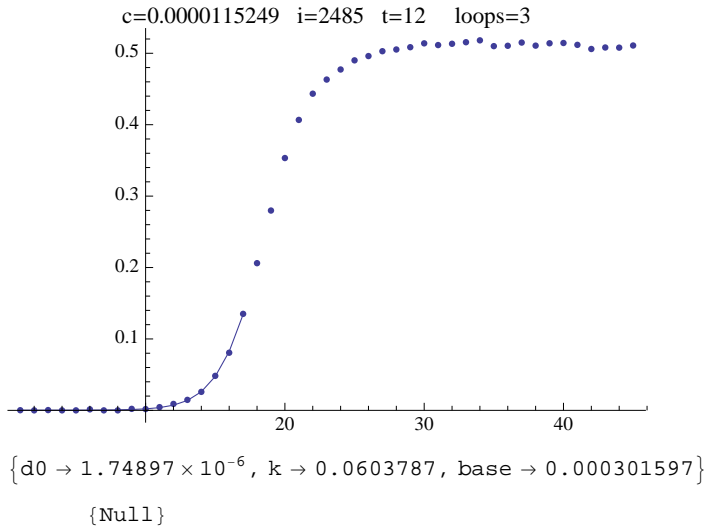

**MAK2[x212data]**

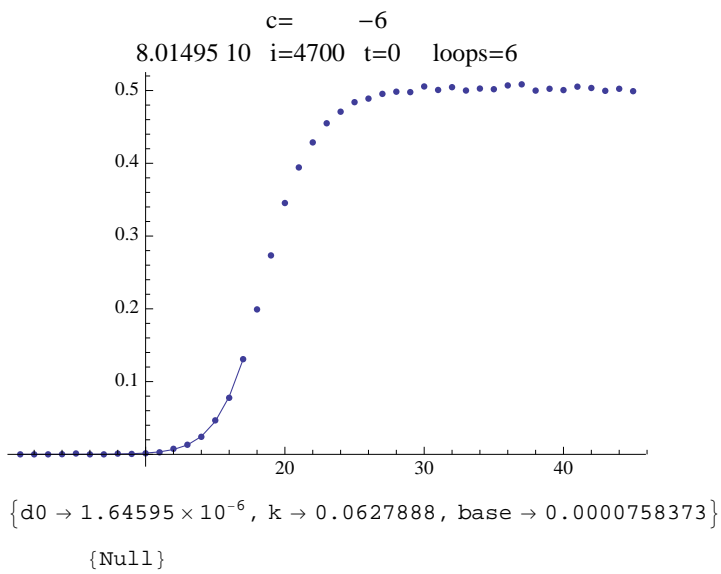

**MAK2[x213data]**

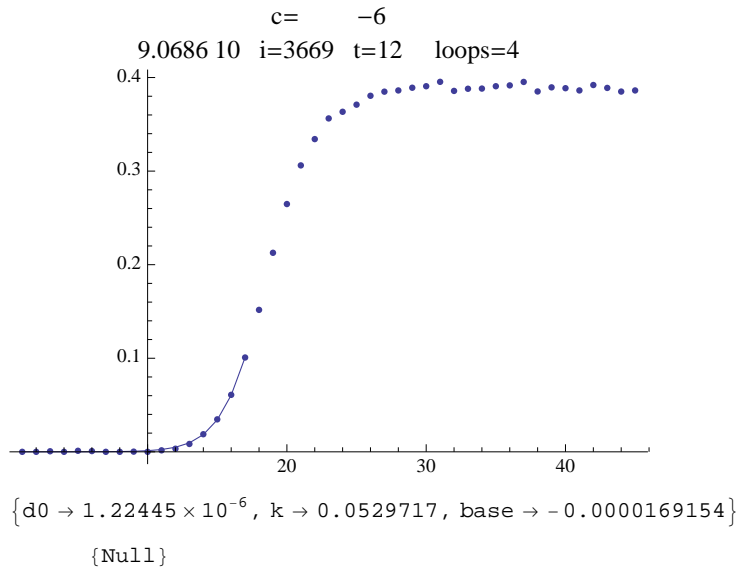

**MAK2[x214data]**

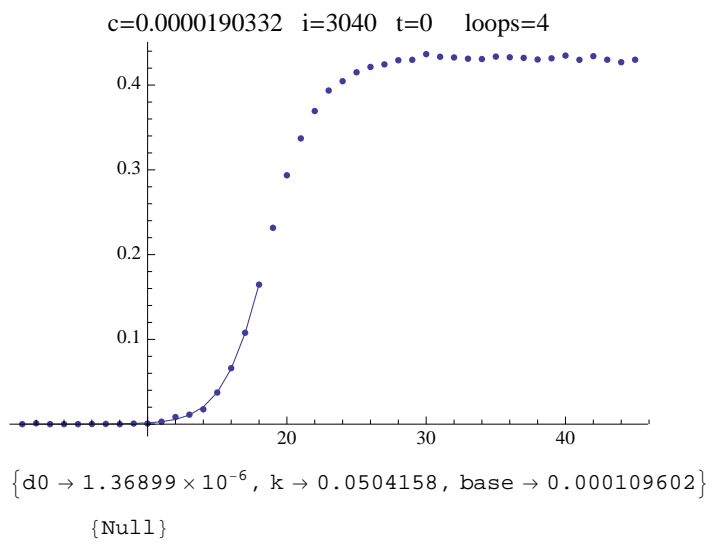

**MAK2[x221data]**



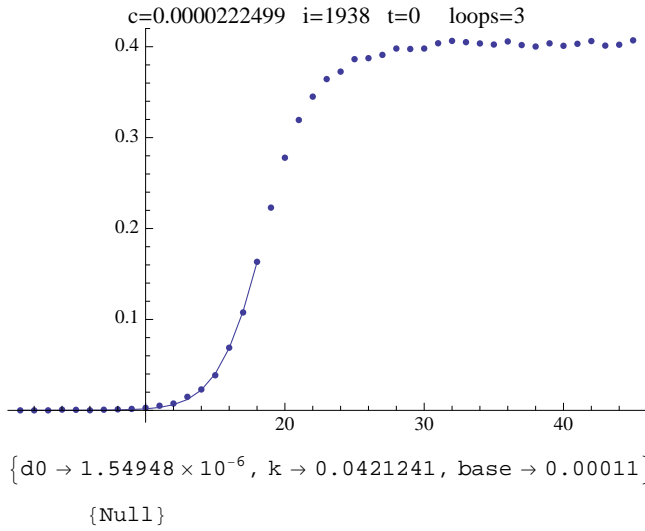

**MAK2[x222data]**

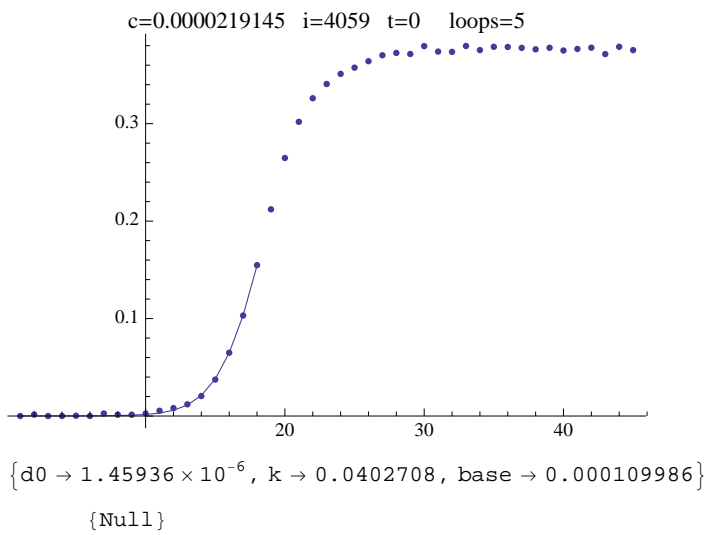

**MAK2[x223data]**

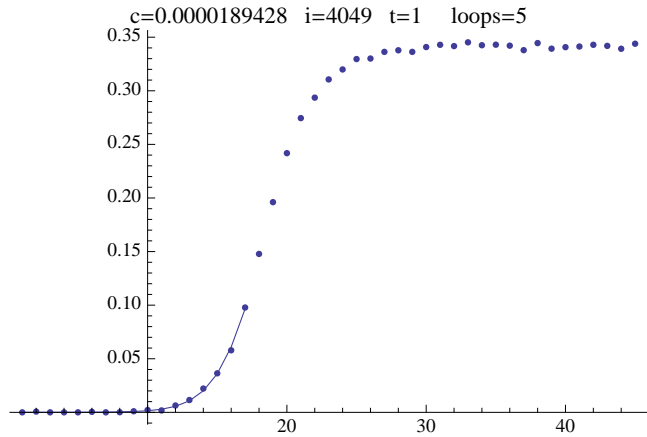

{d0 → 1.40305 × 10<sup>-6</sup>, k → 0.0360402, base → 0.0000796797}

{Null}

**MAK2[X224data]**

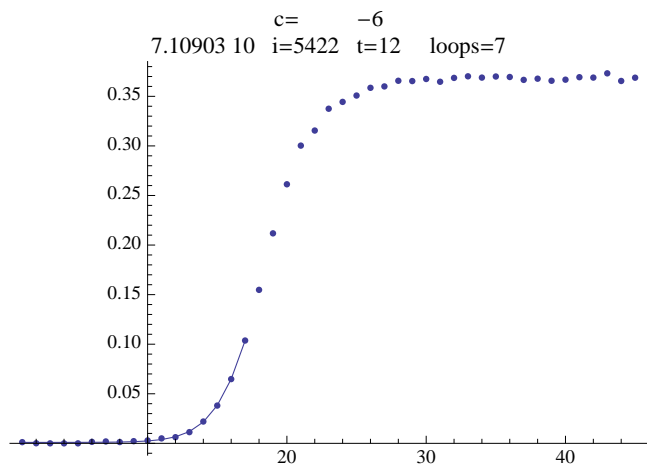

{d0 → 1.42086 × 10<sup>-6</sup>, k → 0.0415489, base → 0.000947494}

{Null}

**MAK2[X231data]**

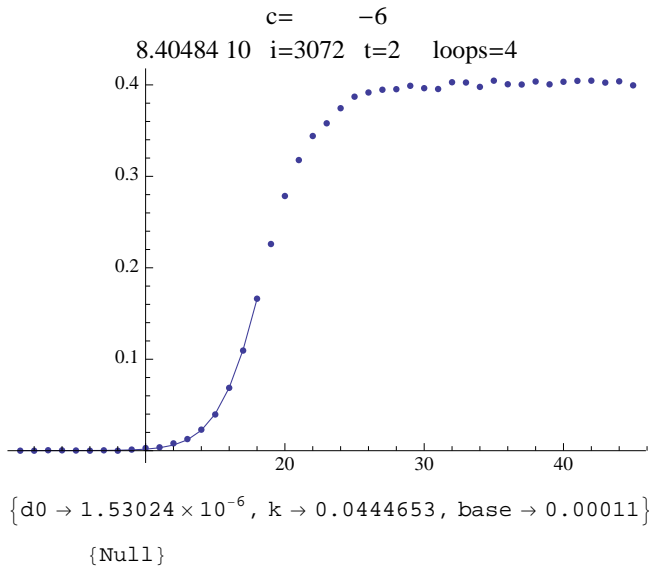

**MAK2[x232data]**

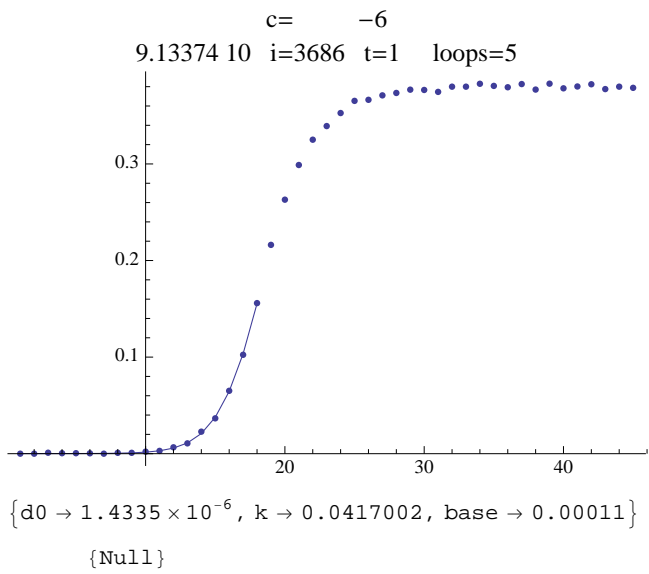

**MAK2[x233data]**

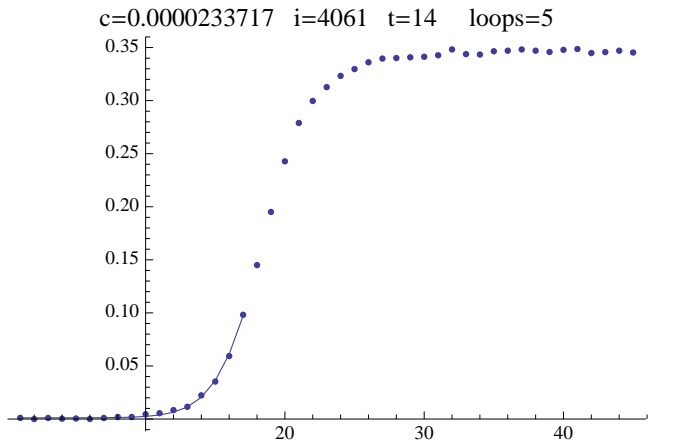

{d0 →  $1.34529 \times 10^{-6}$ , k → 0.0382281, base → 0.0010868}

{Null}

**MAK2[X234data]**

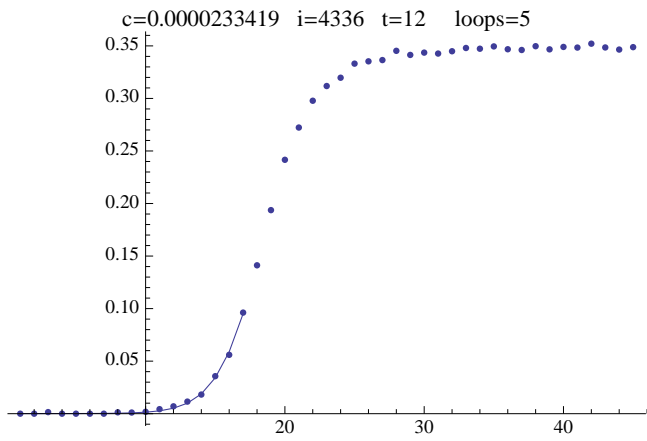

{d0 →  $1.28182 \times 10^{-6}$ , k → 0.0402749, base → 0.00011}

{Null}

**MAK2[X241data]**

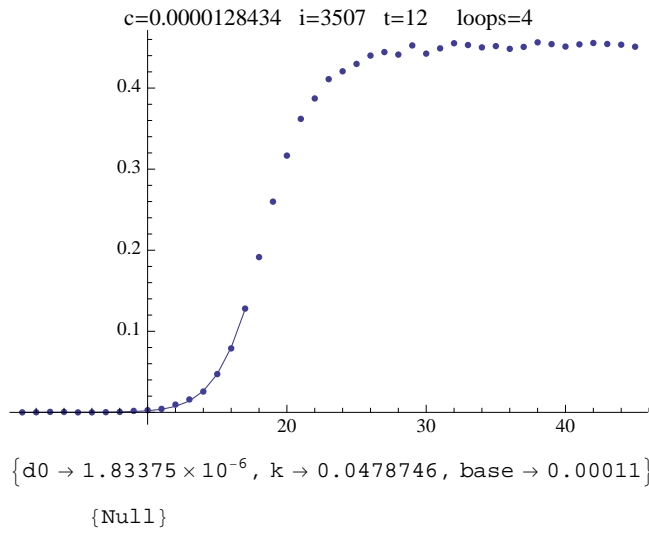

**MAK2[X242data]**

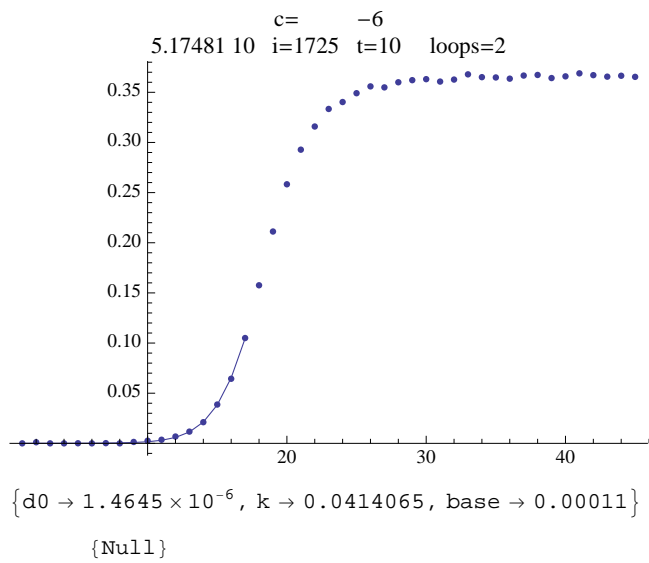

**MAK2[X243data]**

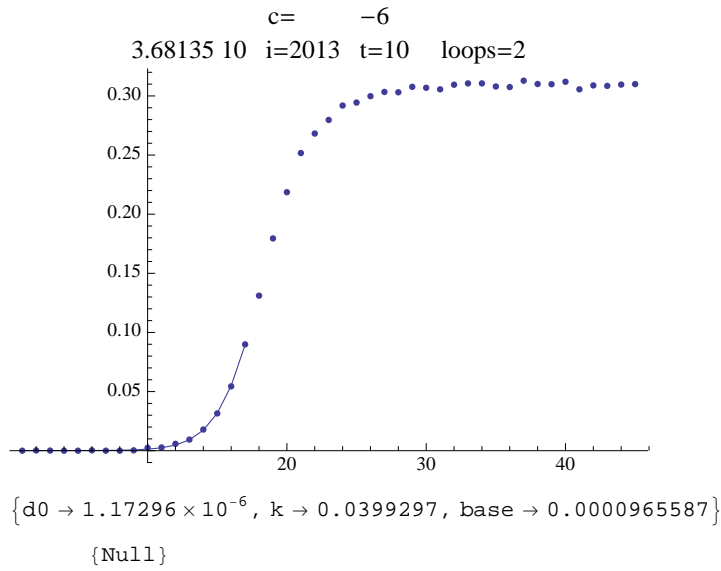

**MAK2[x244data]**

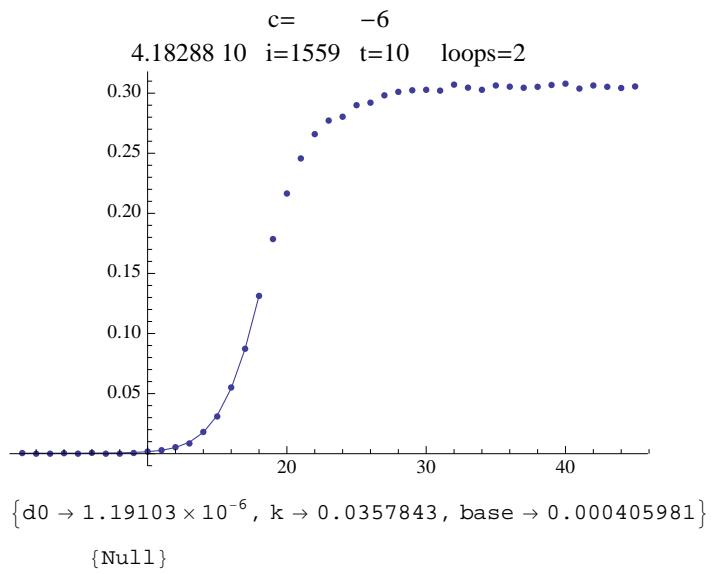

**MAK2[x251data]**

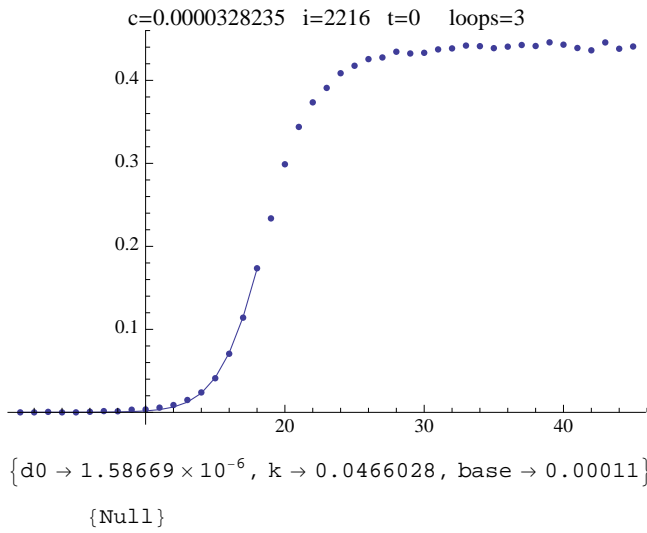

**MAK2[X252data]**

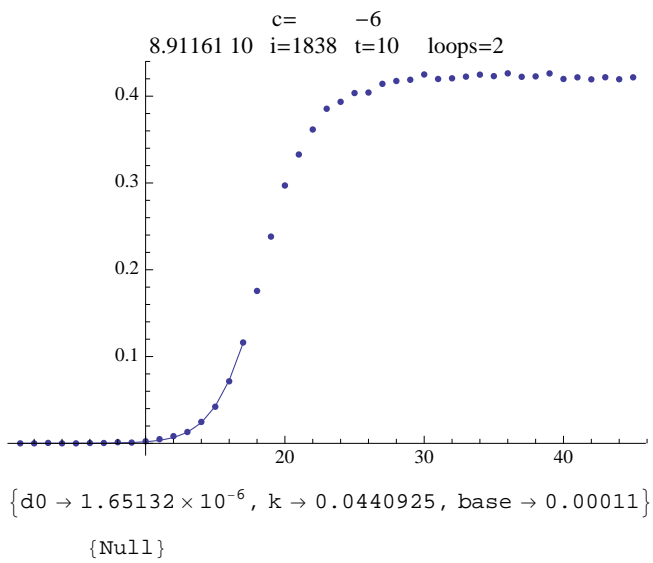

**MAK2[X253data]**

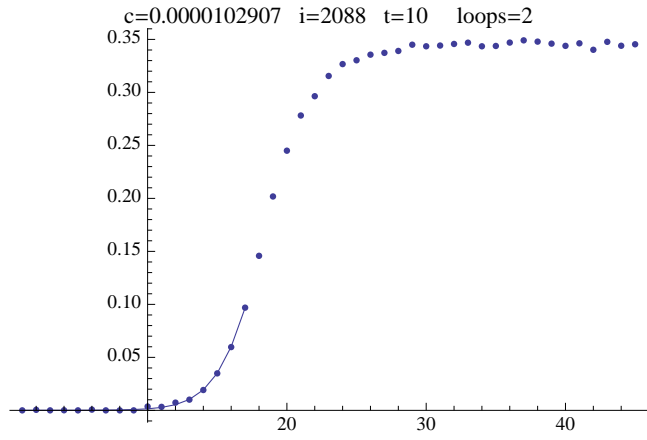

{d0 →  $1.32244 \times 10^{-6}$ , k → 0.0398722, base → 0.00011}  
{Null}

**MAK2[X254data]**

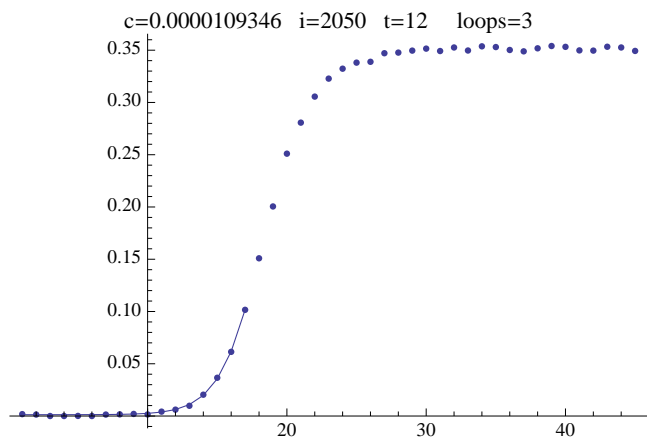

{d0 →  $1.23903 \times 10^{-6}$ , k → 0.0507799, base → 0.00126325}  
{Null}

**MAK2[X311data]**



c=0.0000133049 i=4046 t=0 loops=6

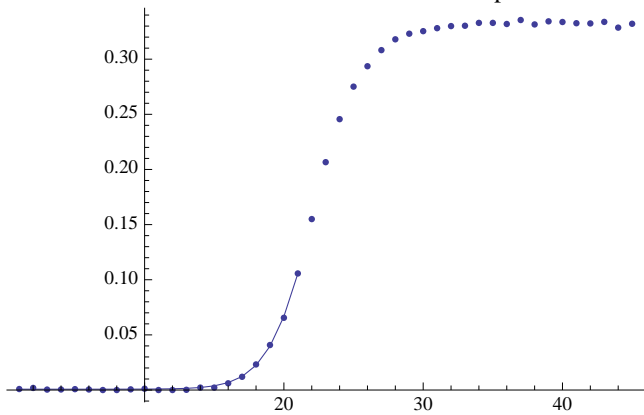

{d0 →  $9.47733 \times 10^{-8}$ , k → 0.0393325, base → 0.00074481}

{Null}

**MAK2[X312data]**

c=0.0000116049 i=1352 t=0 loops=2

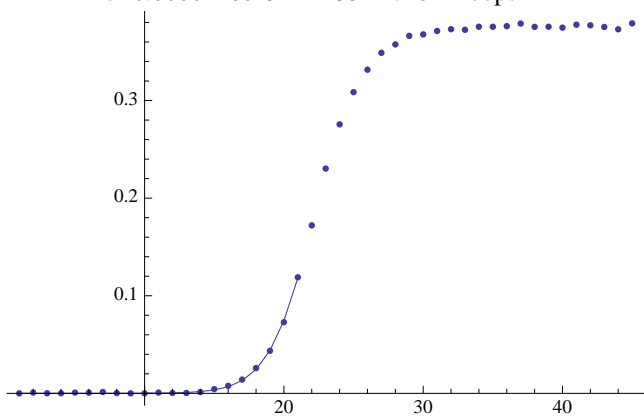

{d0 →  $1.07018 \times 10^{-7}$ , k → 0.0441896, base → 0.0000750592}

{Null}

**MAK2[X313data]**

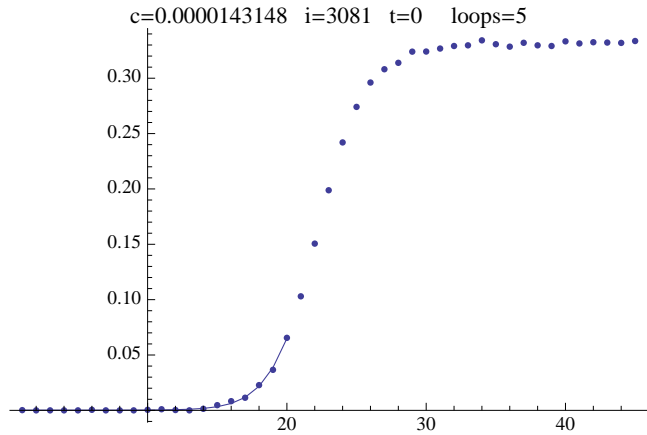

{d0 →  $9.49828 \times 10^{-8}$ , k → 0.0365064, base → 0.000229541}

{Null}

**MAK2[X314data]**

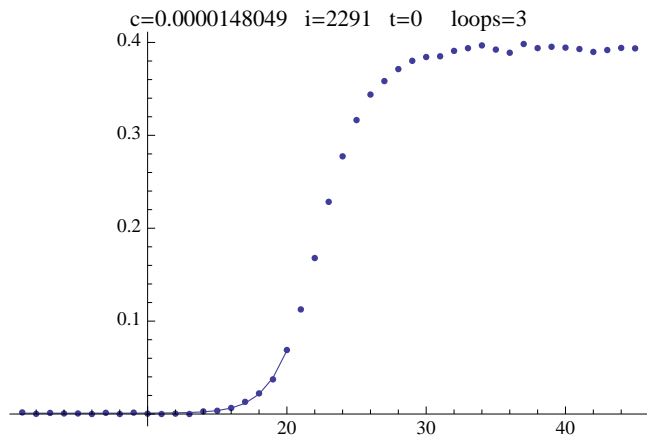

{d0 →  $8.51898 \times 10^{-8}$ , k → 0.0589681, base → 0.000915049}

{Null}

**MAK2[X321data]**

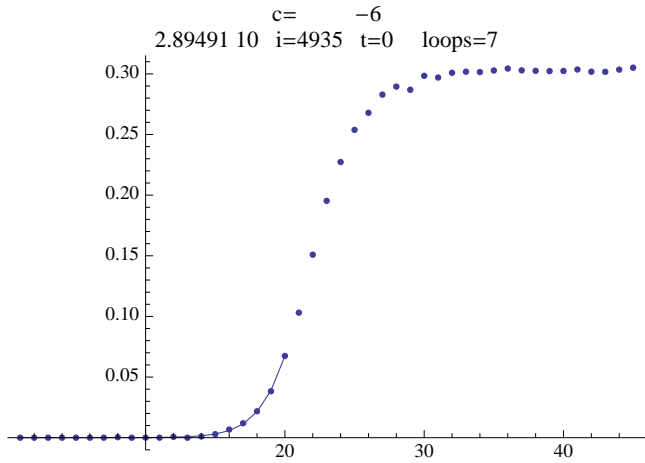

{d0 →  $9.14548 \times 10^{-8}$ , k → 0.0461974, base → 0.0000436121}

{Null}

**MAK2[X322data]**

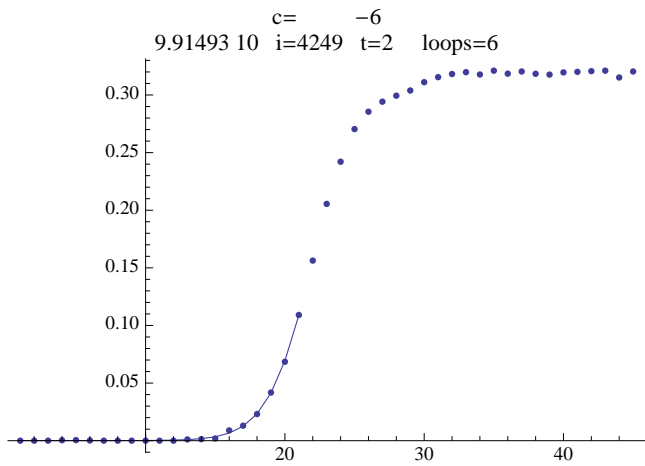

{d0 →  $1.03398 \times 10^{-7}$ , k → 0.0377521, base → 0.0000794433}

{Null}

**MAK2[X323data]**

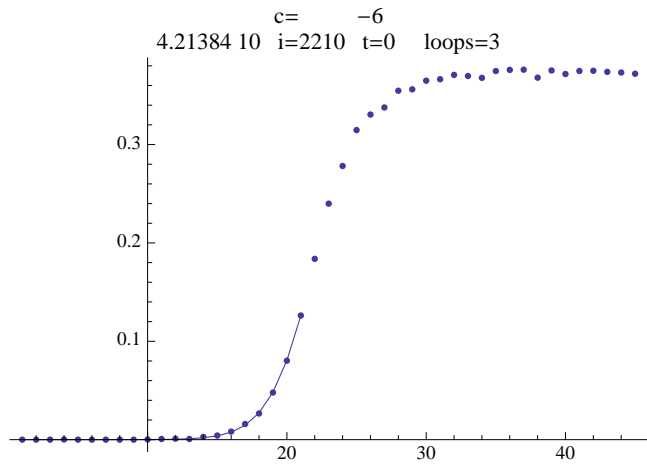

{d0 →  $1.21782 \times 10^{-7}$ , k → 0.042771, base → -0.0000291252}

{Null}

**MAK2[X324data]**

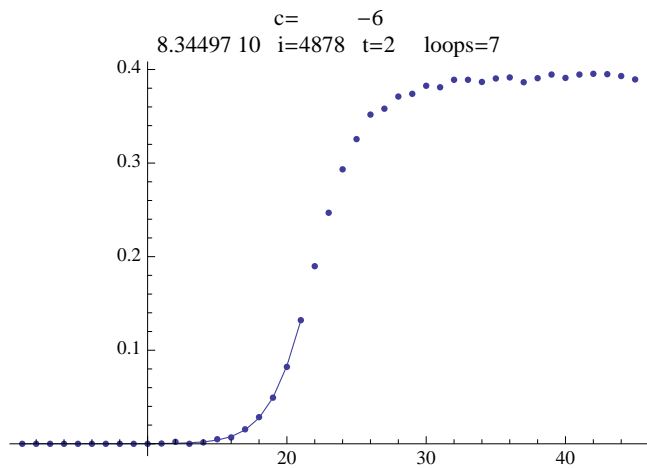

{d0 →  $1.20887 \times 10^{-7}$ , k → 0.048242, base → 0.0000760514}

{Null}

**MAK2[X331data]**

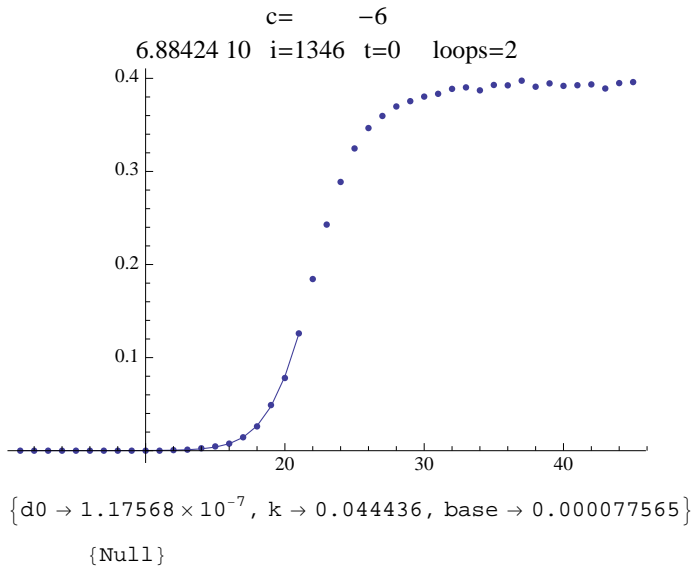

**MAK2[X332data]**

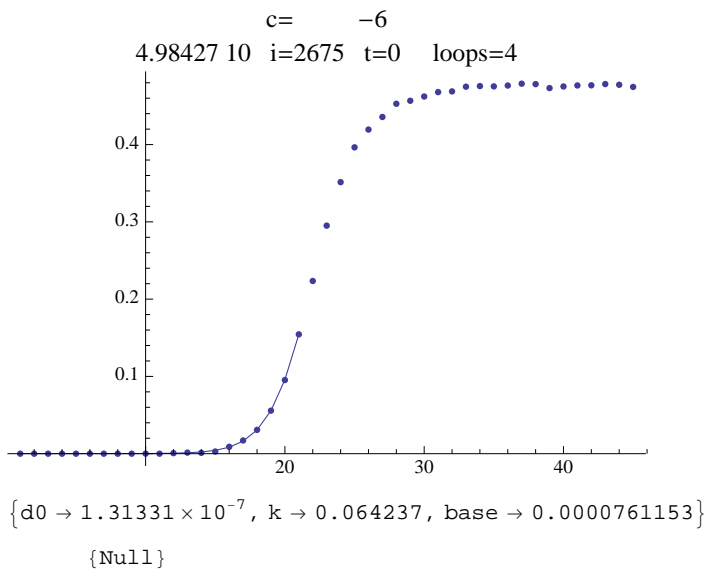

**MAK2[X333data]**

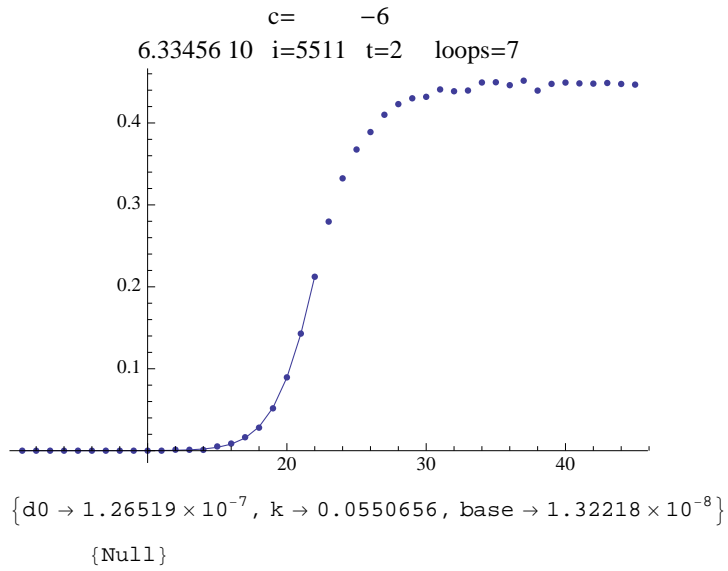

**MAK2[X334data]**

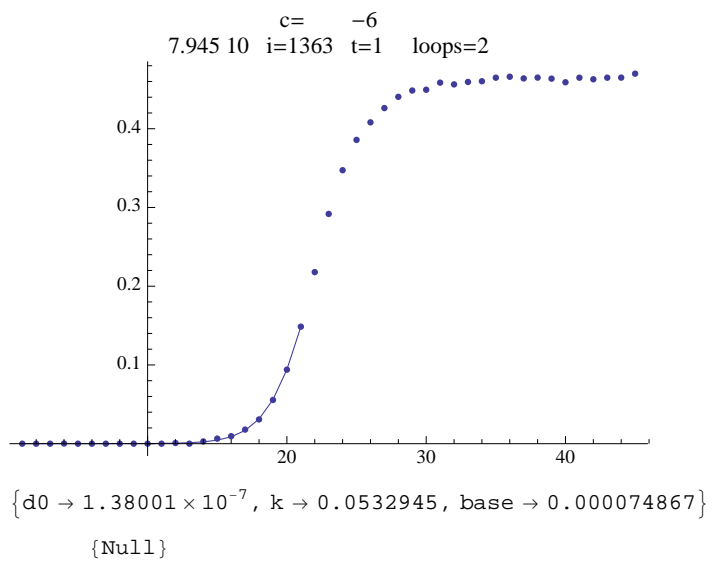

**MAK2[X341data]**

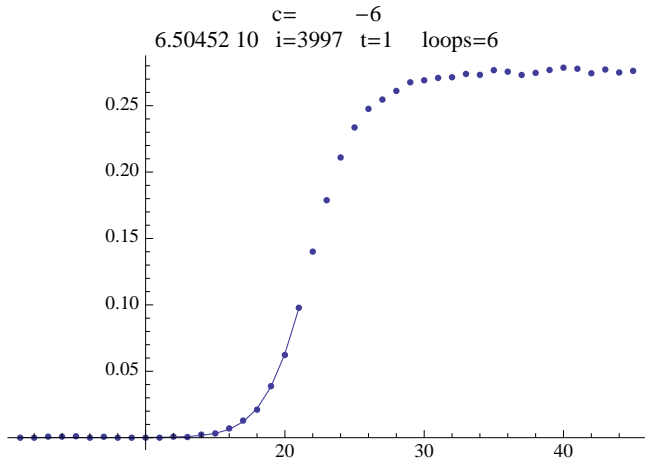

{d0 →  $9.95116 \times 10^{-8}$ , k → 0.0303874, base → 0.0000853477}

{Null}

**MAK2[X342data]**

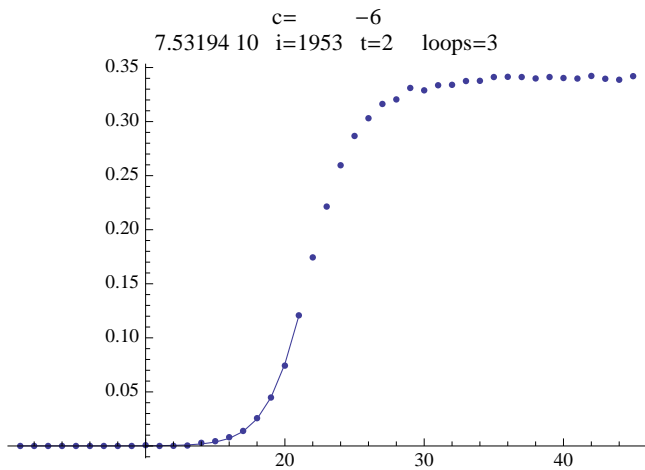

{d0 →  $1.09334 \times 10^{-7}$ , k → 0.0447068, base → 0.0000767723}

{Null}

**MAK2[X343data]**

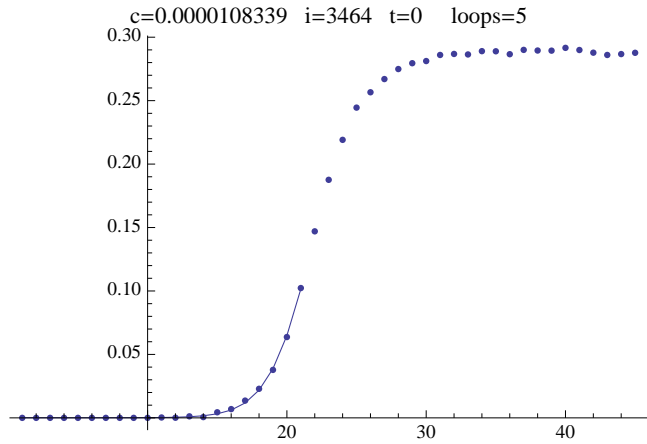

{d0 →  $9.68507 \times 10^{-8}$ , k → 0.0350697, base → 0.000079433}

{Null}

**MAK2[x344data]**

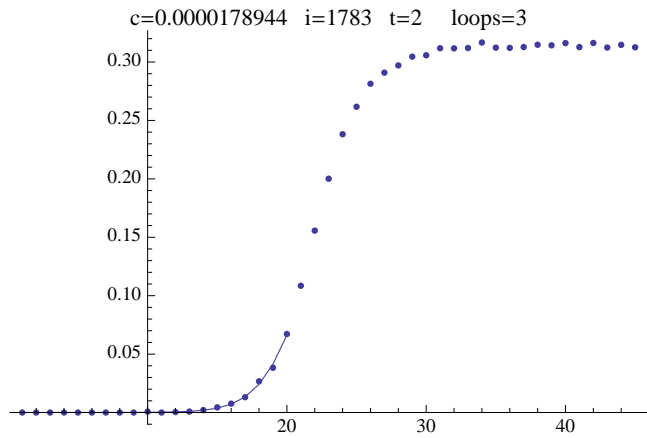

{d0 →  $1.14916 \times 10^{-7}$ , k → 0.0266979, base → 0.0000757949}

{Null}

**MAK2[x351data]**



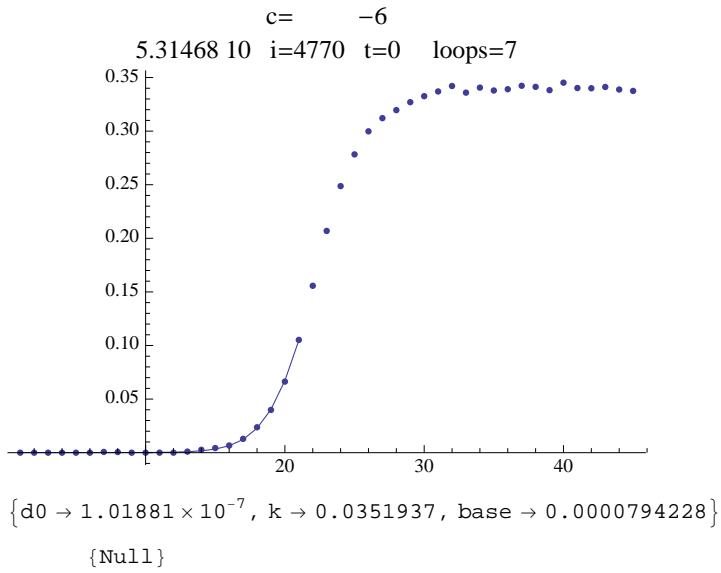

**MAK2[X352data]**

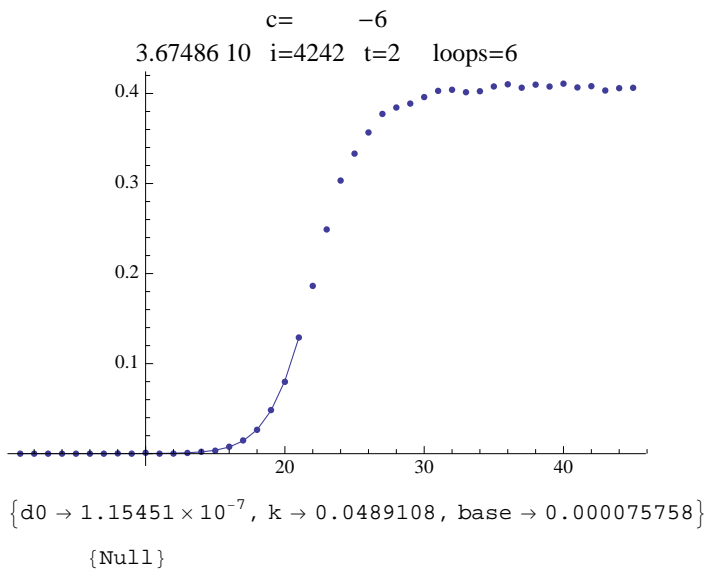

**MAK2[X353data]**

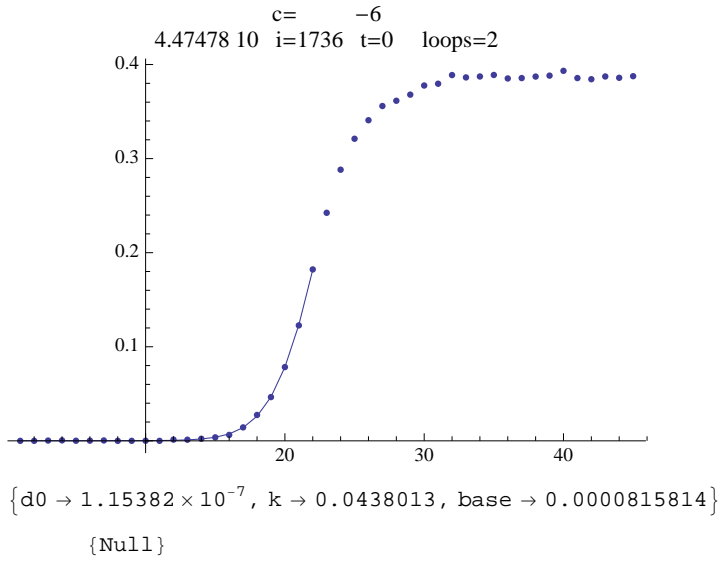

**MAK2[X354data]**

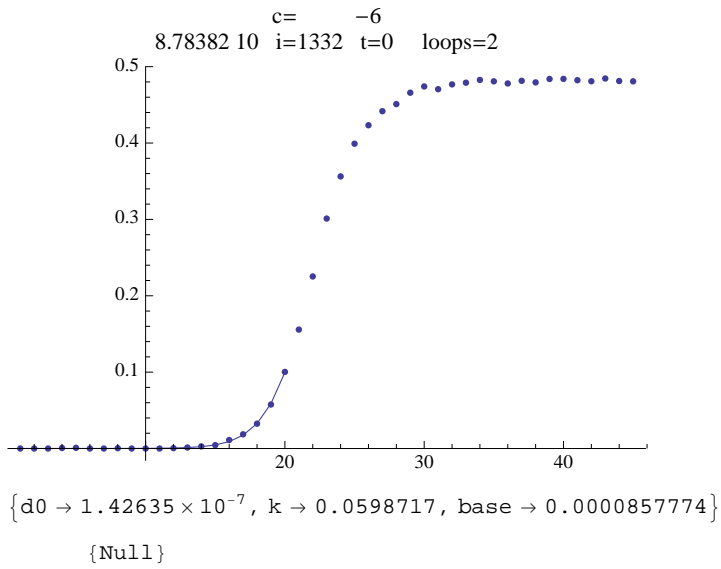

**MAK2[X411data]**

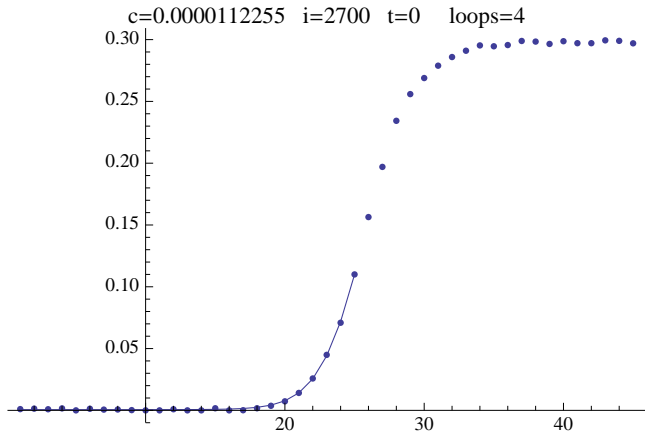

{d0 →  $7.15979 \times 10^{-9}$ , k → 0.0331137, base → 0.000578736}

{Null}

**MAK2[X412data]**

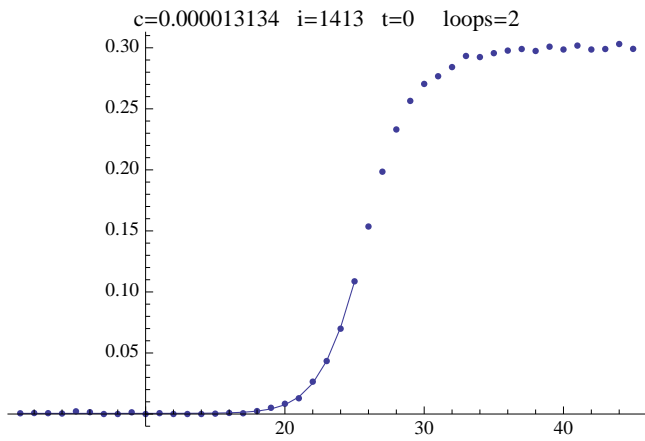

{d0 →  $7.09357 \times 10^{-9}$ , k → 0.0325253, base → 0.000521952}

{Null}

**MAK2[X413data]**

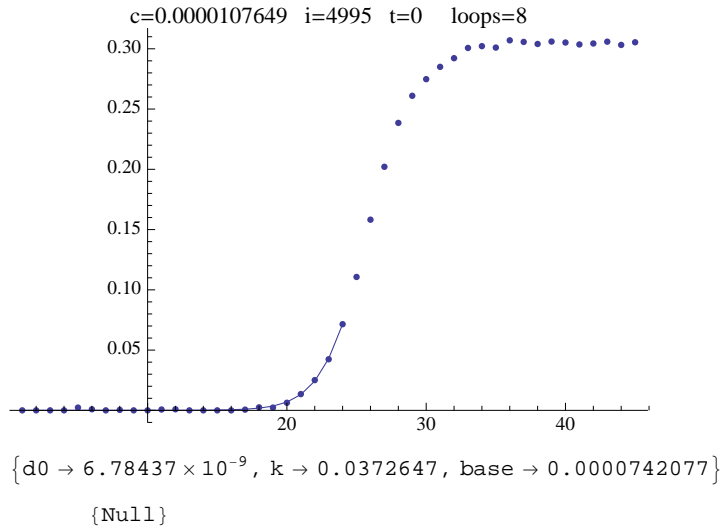

{d0 →  $6.77392 \times 10^{-9}$ , k → 0.036774, base → 0.000162683}

{Null}

**MAK2[X414data]**

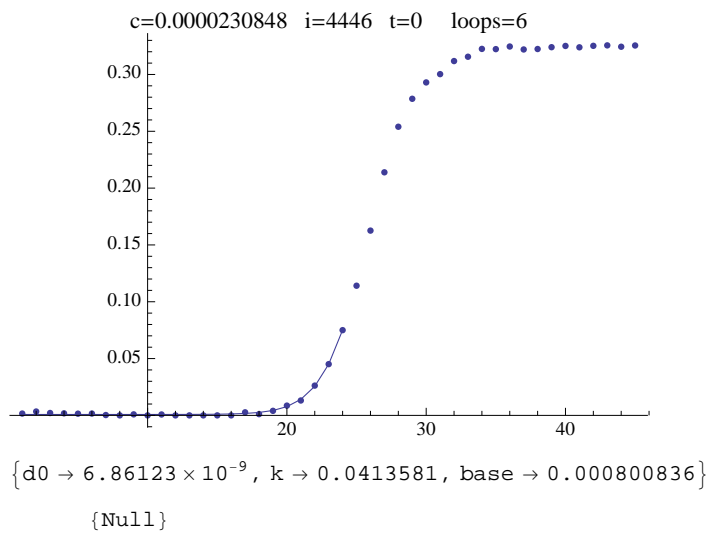

**MAK2[X421data]**

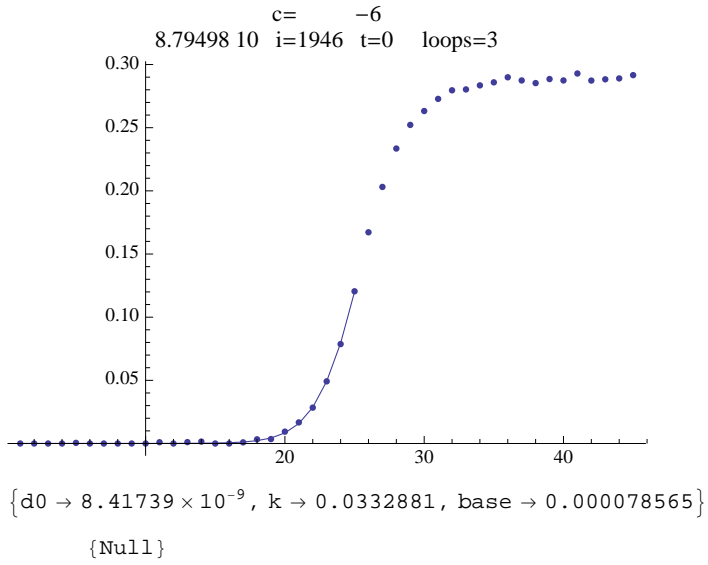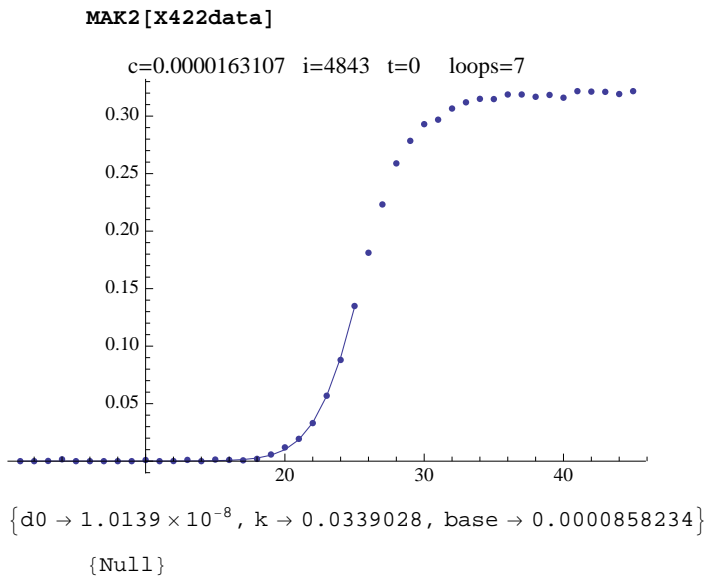

**MAK2[x423data]**

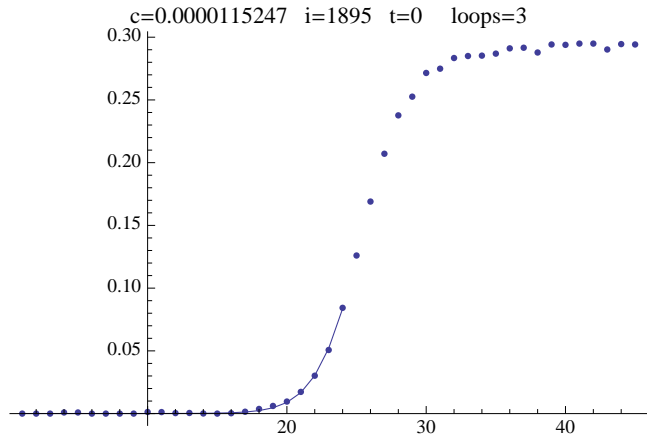

{d0 →  $8.96456 \times 10^{-9}$ , k → 0.0342922, base → 0.0000776909}

{Null}

**MAK2[X424data]**

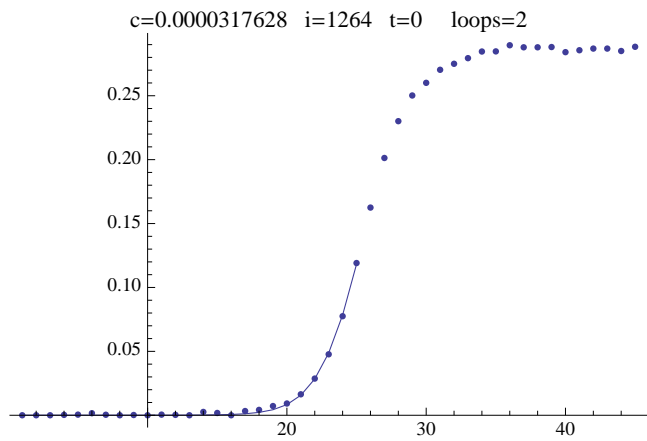

{d0 →  $8.38342 \times 10^{-9}$ , k → 0.0323229, base → 0.0000800686}

{Null}

**MAK2[X431data]**

c=0.0000123247 i=4435 t=2 loops=7

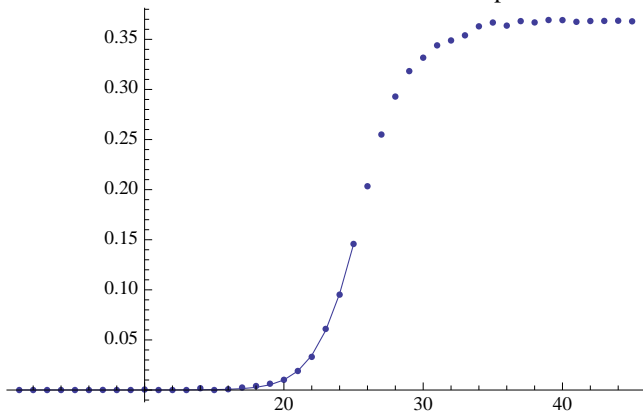

{d0 →  $1.0119 \times 10^{-8}$ , k → 0.0406919, base → 0.0000749599}

{Null}

**MAK2[X432data]**

c=0.0000119948 i=4791 t=0 loops=7

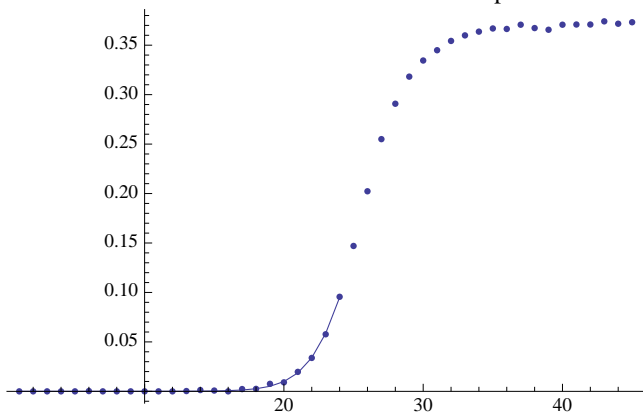

{d0 →  $9.9279 \times 10^{-9}$ , k → 0.0407538, base → 0.0000788918}

{Null}

**MAK2[X433data]**

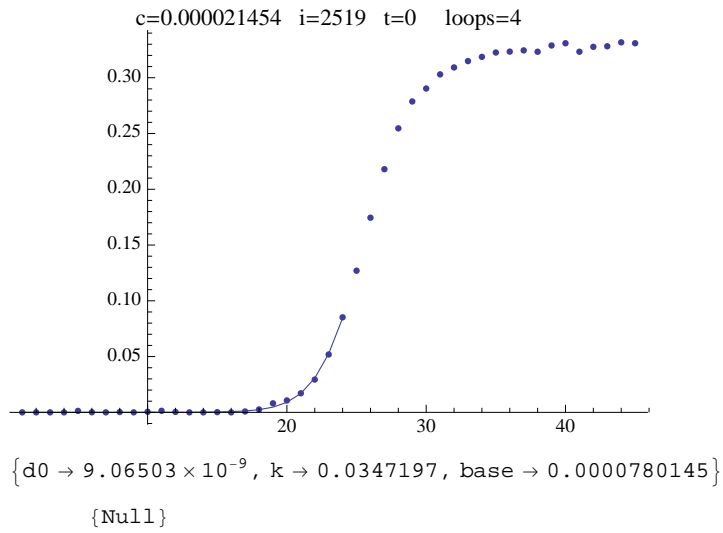

**MAK2[X434data]**

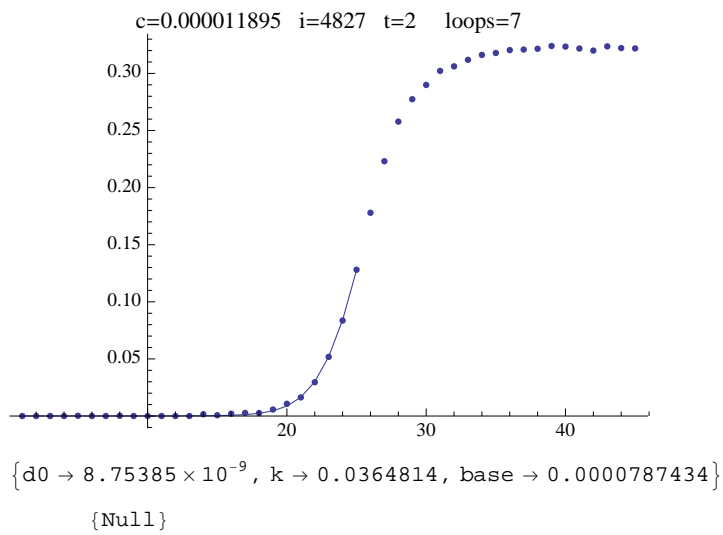

**MAK2[X441data]**



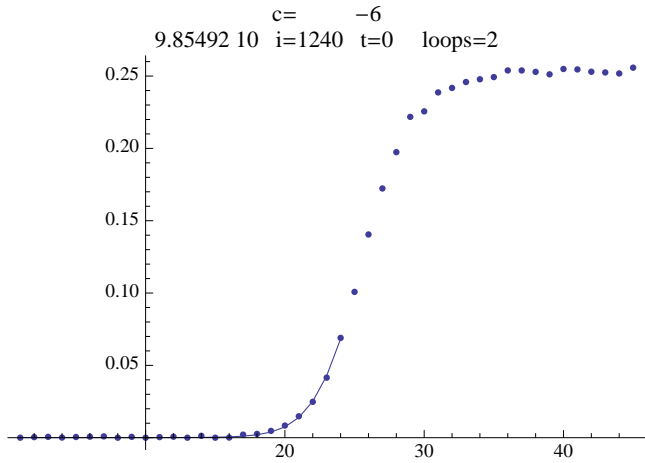

{d0 →  $7.5403 \times 10^{-9}$ , k → 0.0266258, base → 0.0000800432}

{Null}

**MAK2[X442data]**

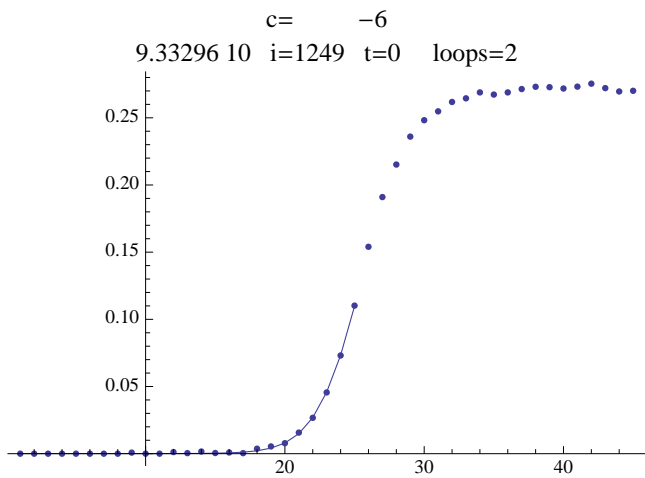

{d0 →  $8.03275 \times 10^{-9}$ , k → 0.0289249, base → 0.000078654}

{Null}

**MAK2[X443data]**

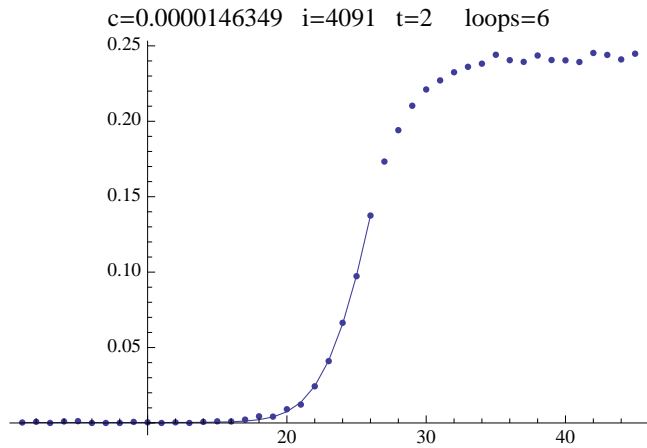

{d0 →  $7.29877 \times 10^{-9}$ , k → 0.0250262, base → 0.00029937}  
 {Null}

**MAK2[X444data]**

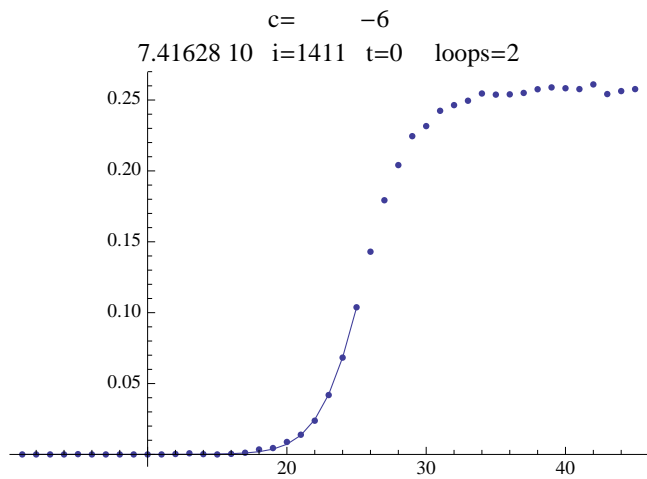

{d0 →  $7.18654 \times 10^{-9}$ , k → 0.0290718, base → 0.0000750314}  
 {Null}

**MAK2[X451data]**

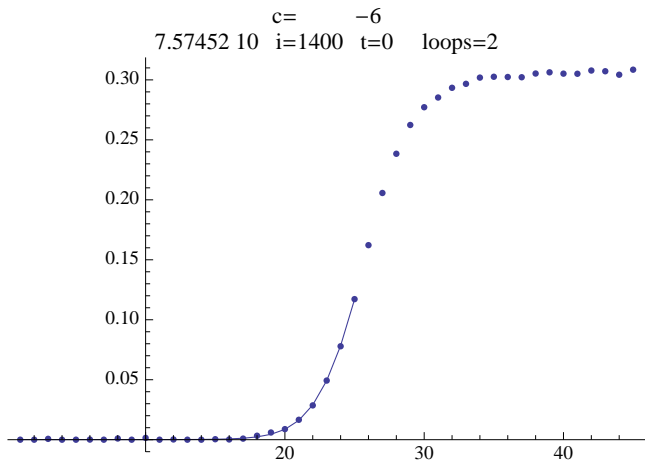

{d0 →  $8.72372 \times 10^{-9}$ , k → 0.03015, base → 0.0000807904}

{Null}

**MAK2[X452data]**

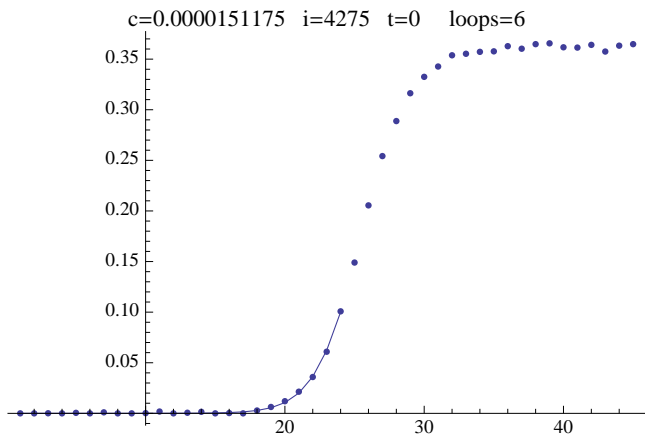

{d0 →  $1.07316 \times 10^{-8}$ , k → 0.0411241, base → 0.0000768858}

{Null}

**MAK2[X453data]**

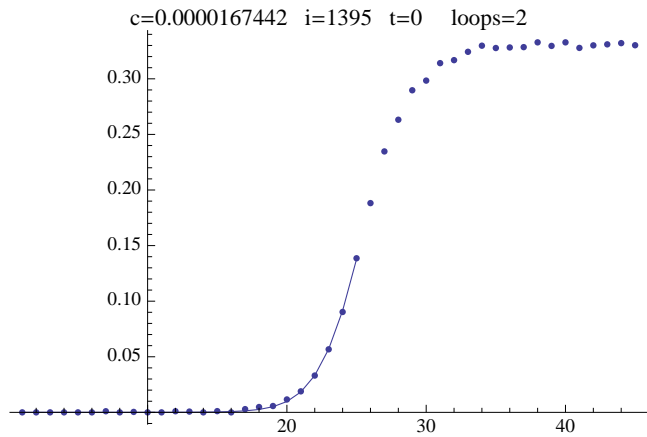

{d0 →  $9.82303 \times 10^{-9}$ , k → 0.037433, base → 0.0000763102}

{Null}

**MAK2[x454data]**

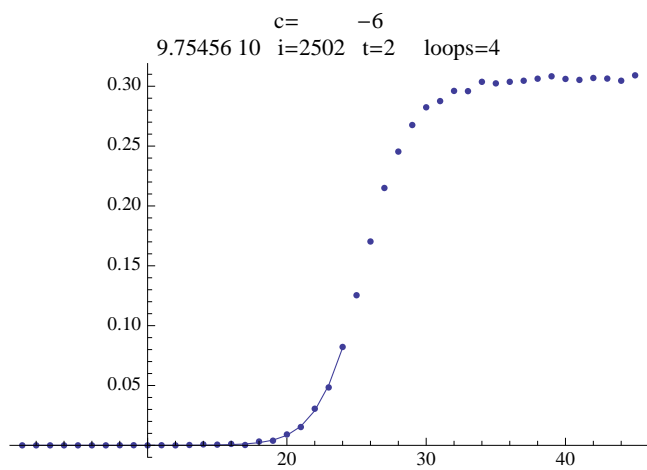

{d0 →  $8.40227 \times 10^{-9}$ , k → 0.0359267, base → 0.0000764992}

{Null}

**MAK2[x511data]**

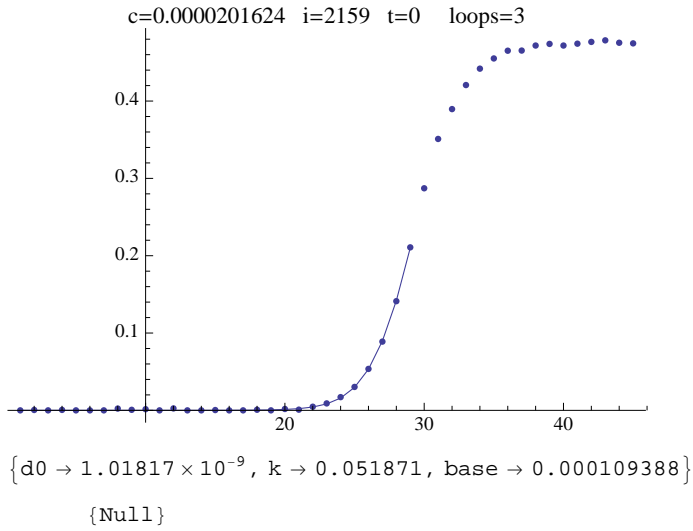

**MAK2[x512data]**

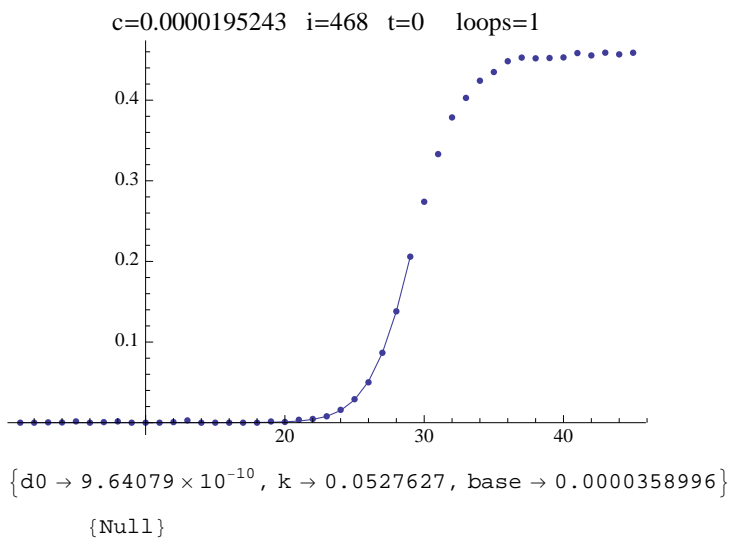

**MAK2[x513data]**

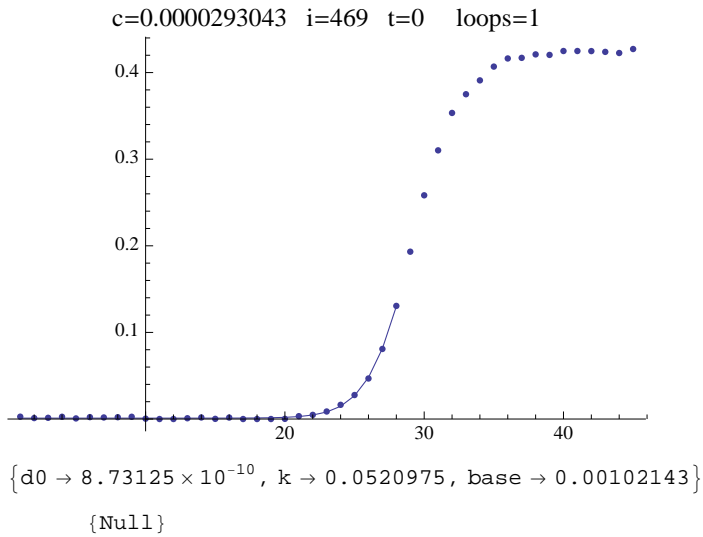

**MAK2[x514data]**

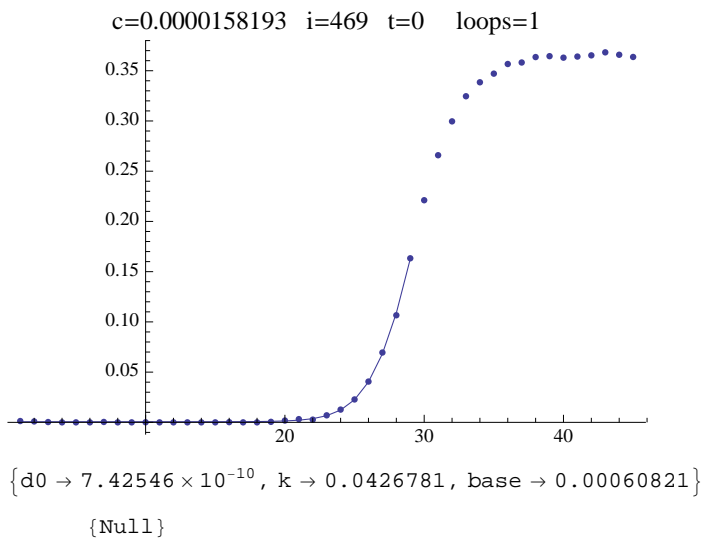

**MAK2[x521data]**

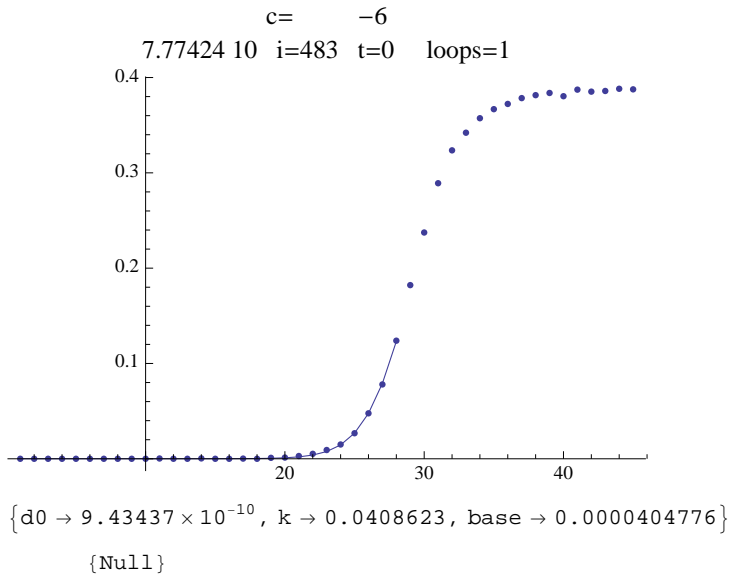

**MAK2[x522data]**

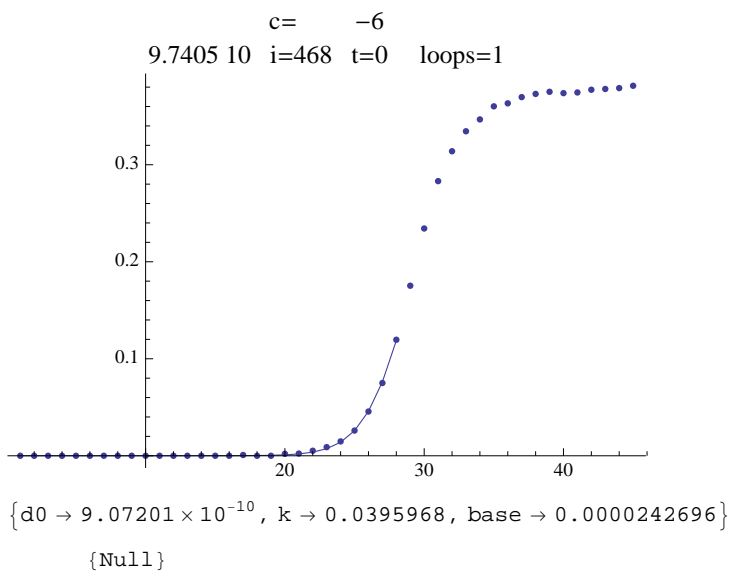

**MAK2[x523data]**

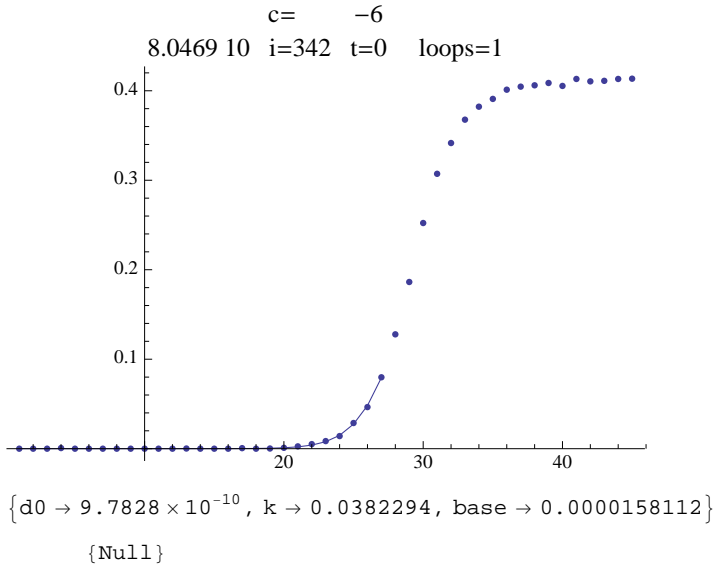

**MAK2[x524data]**

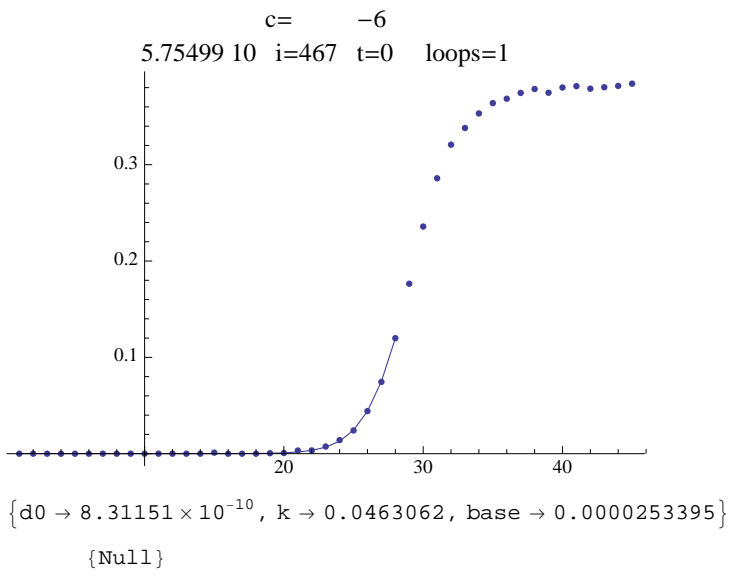

**MAK2[x531data]**



c=0.0000120447 i=461 t=0 loops=1

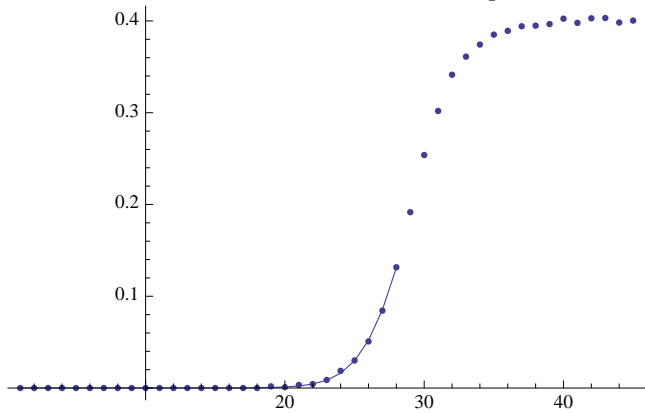

{d0 →  $1.05911 \times 10^{-9}$ , k → 0.0404126, base → 0.0000428602}

{Null}

**MAK2[x532data]**

c=0.0000105237 i=488 t=0 loops=1

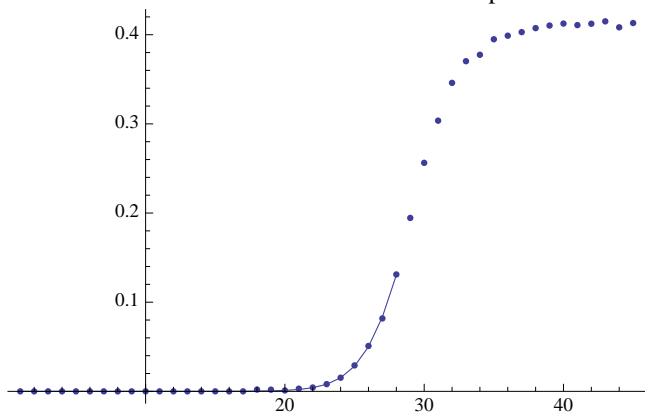

{d0 →  $9.87064 \times 10^{-10}$ , k → 0.044004, base → 0.0000437685}

{Null}

**MAK2[x533data]**

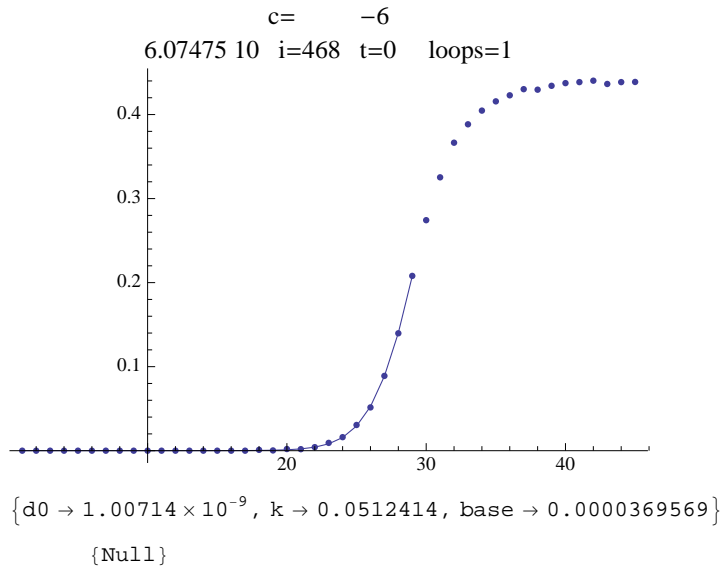

**MAK2[x534data]**

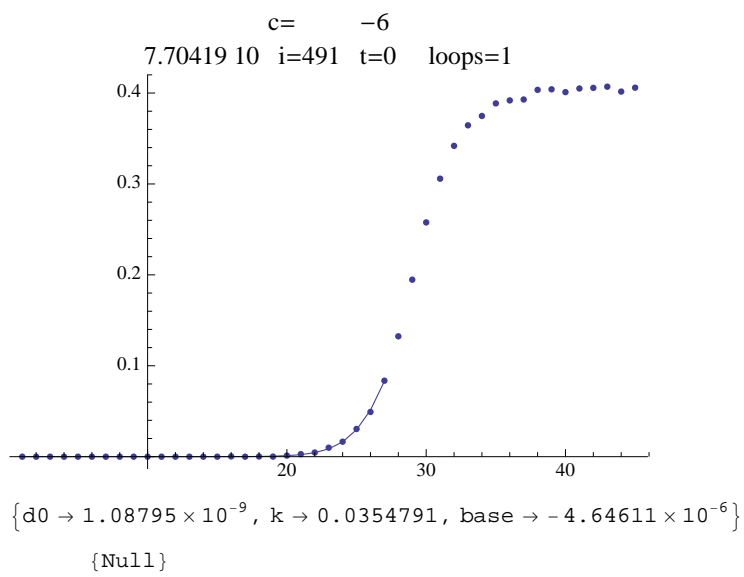

**MAK2[x541data]**

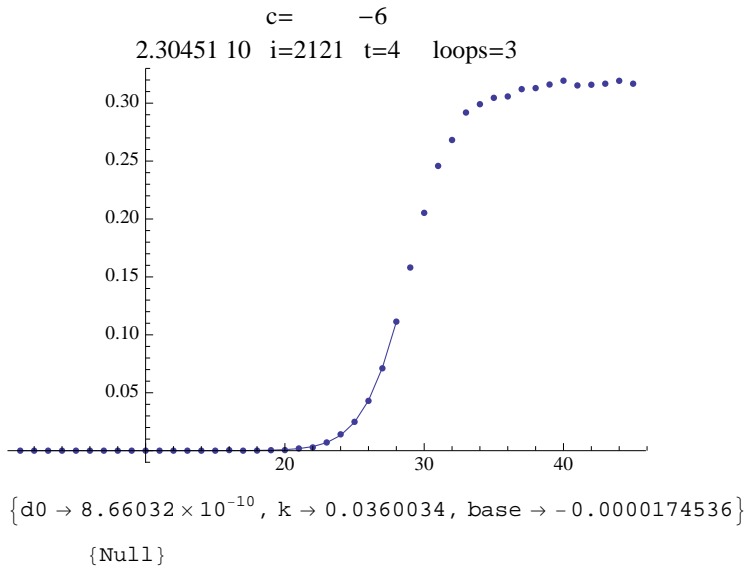

**MAK2[x542data]**

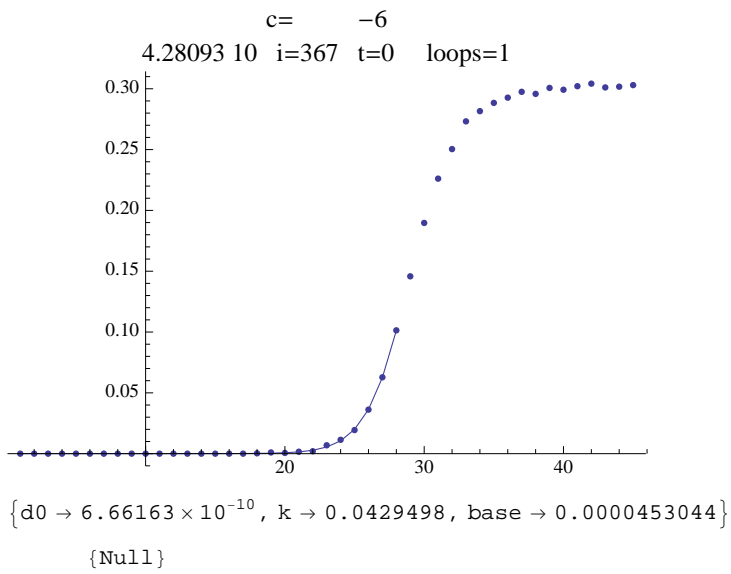

**MAK2[x543data]**

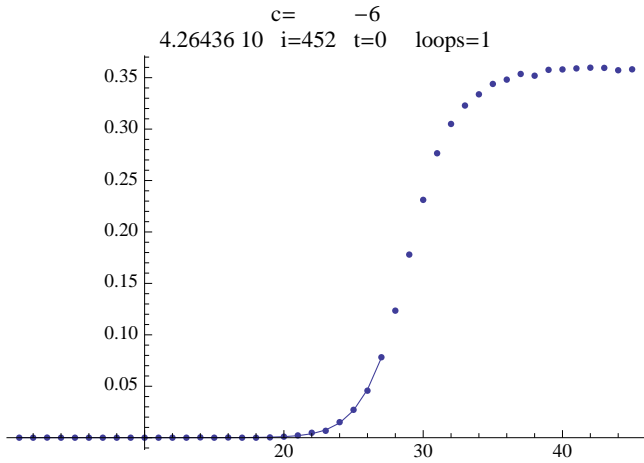

{d0 →  $9.3136 \times 10^{-10}$ , k → 0.0396673, base → 0.0000202784}  
{Null}

**MAK2[X544data]**

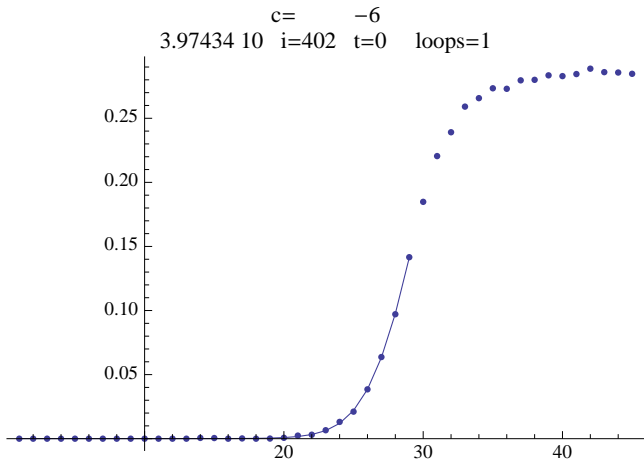

{d0 →  $7.81348 \times 10^{-10}$ , k → 0.0303894, base → 0.0000580525}  
{Null}

**MAK2[X551data]**

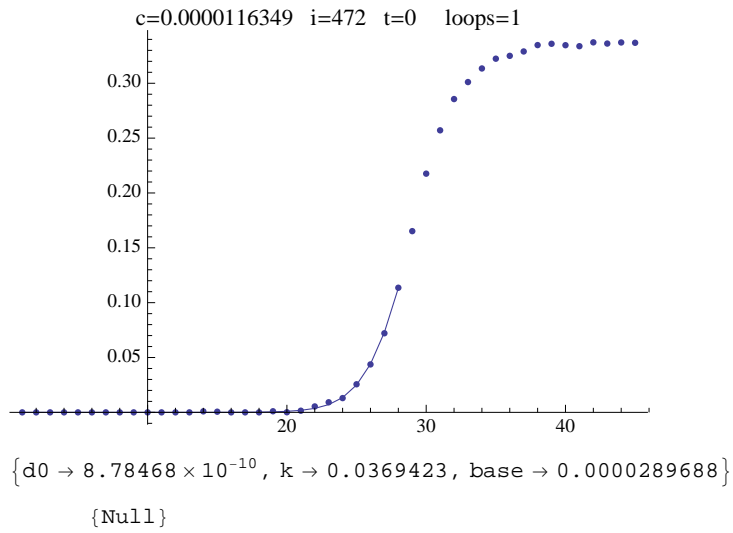

**MAK2[x552data]**

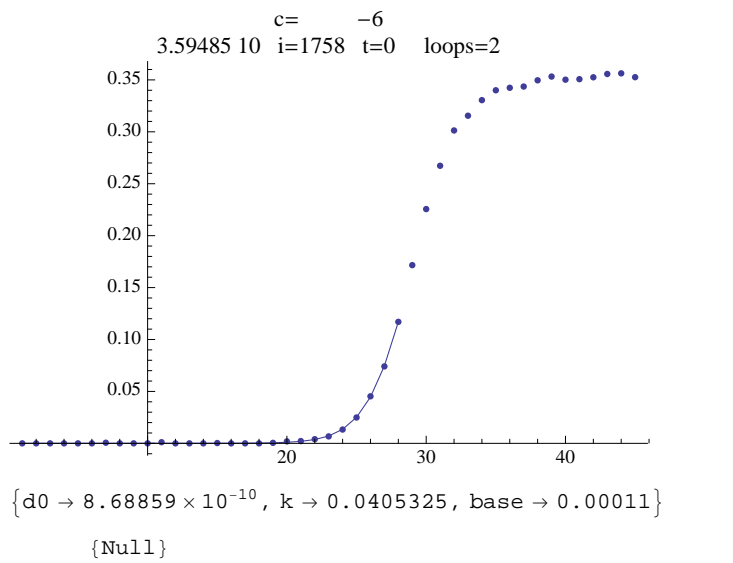

**MAK2[x553data]**

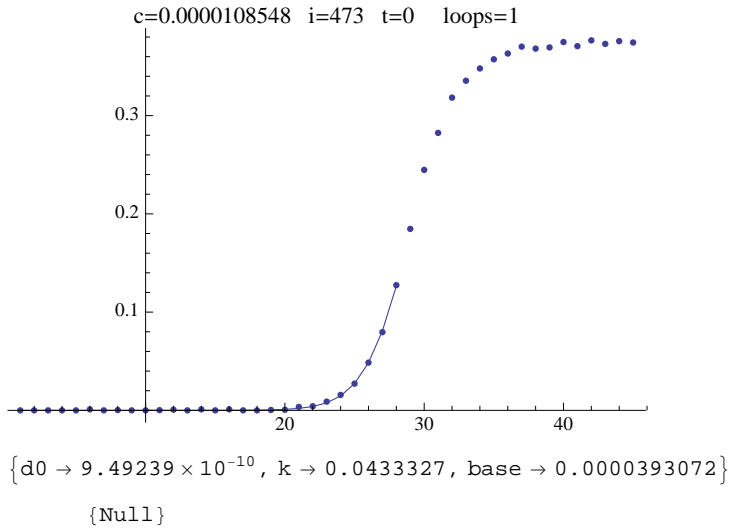

**MAK2[x554data]**

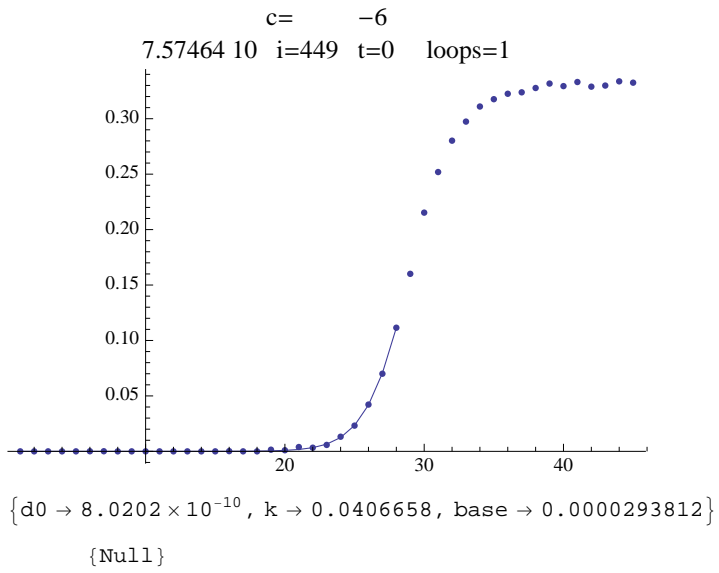

**MAK2[x611data]**

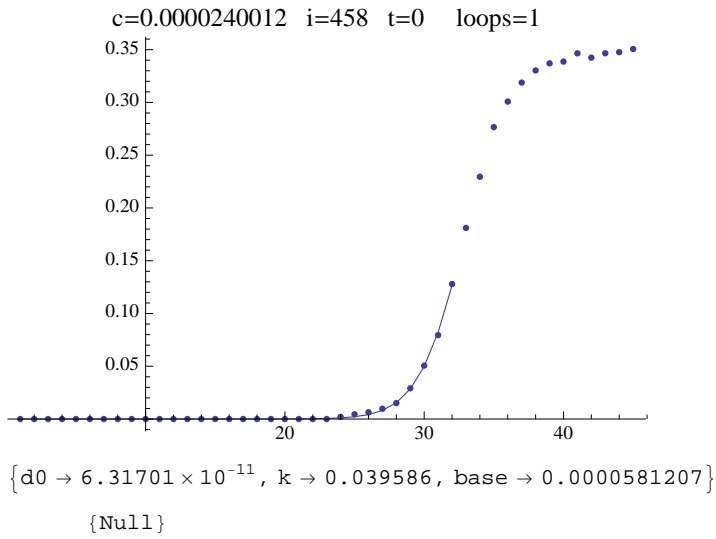

**MAK2[X612data]**

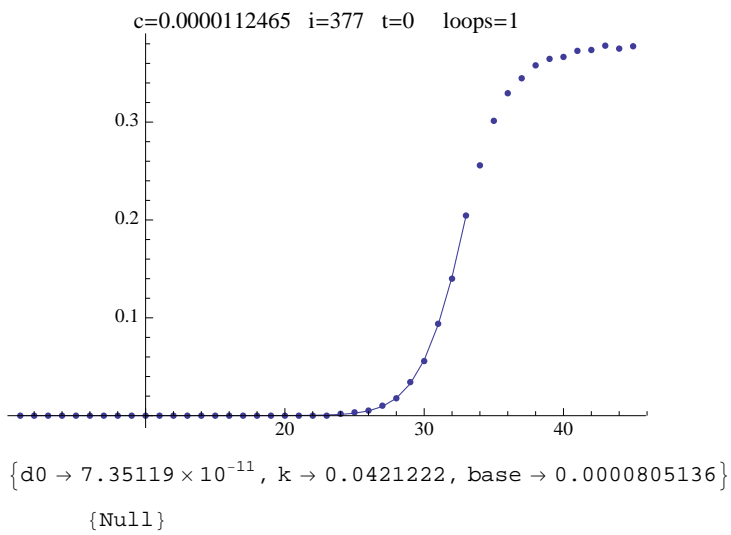

**MAK2[X613data]**

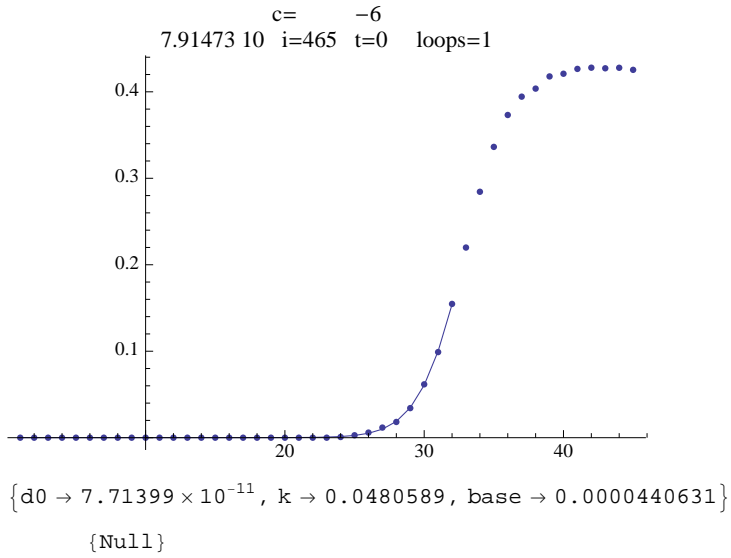

**MAK2[X614data]**

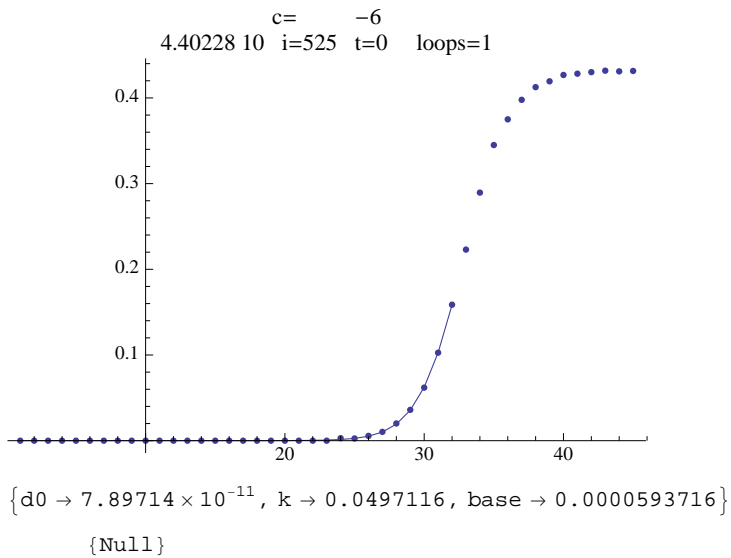

**MAK2[X621data]**



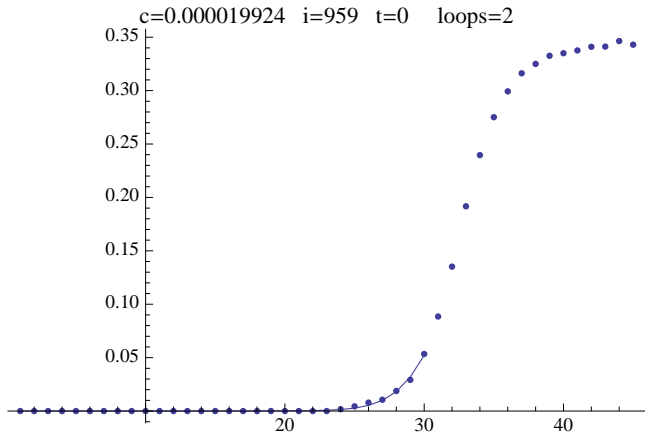

{d0 →  $8.14092 \times 10^{-11}$ , k → 0.0245, base → 0.0000735998}

{Null}

**MAK2[X622data]**

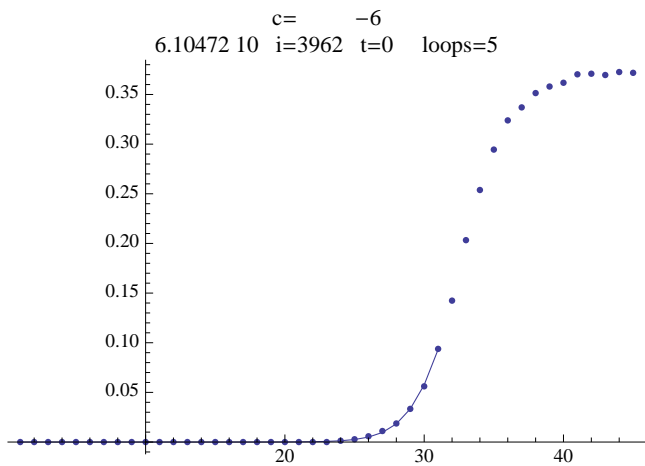

{d0 →  $7.64004 \times 10^{-11}$ , k → 0.0398124, base → 0.0000127666}

{Null}

**MAK2[X623data]**

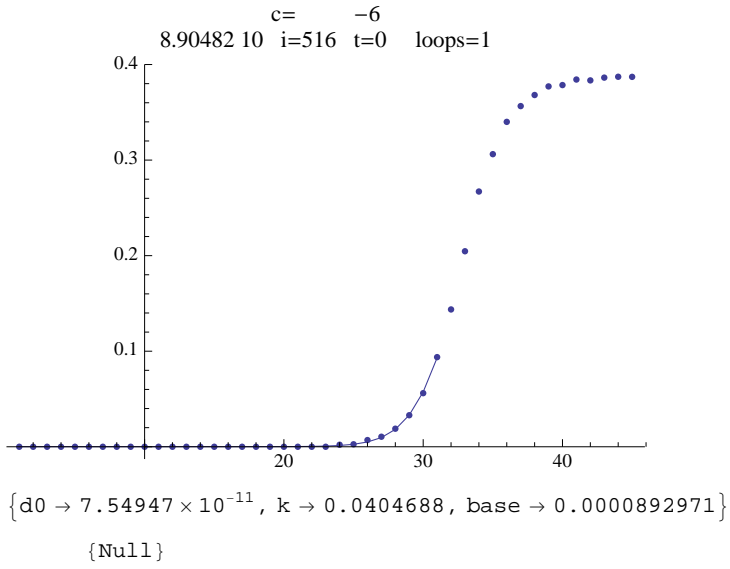

**MAK2[X624data]**

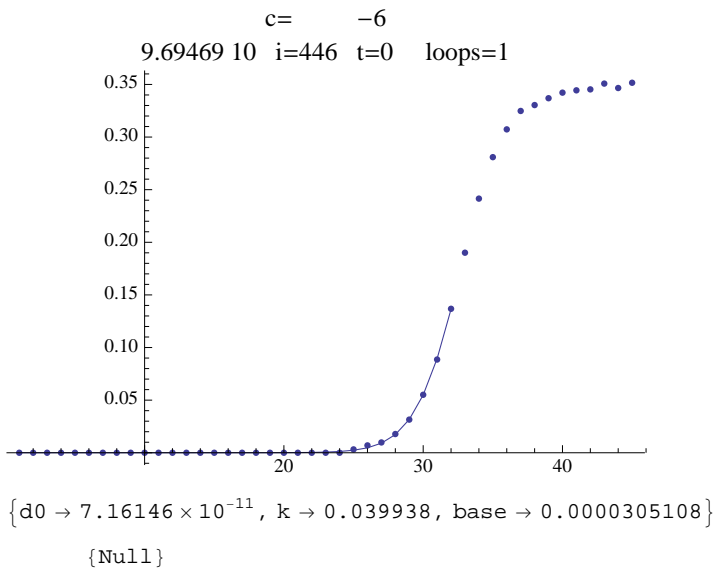

**MAK2[X631data]**

c=0.0000146343 i=427 t=0 loops=1

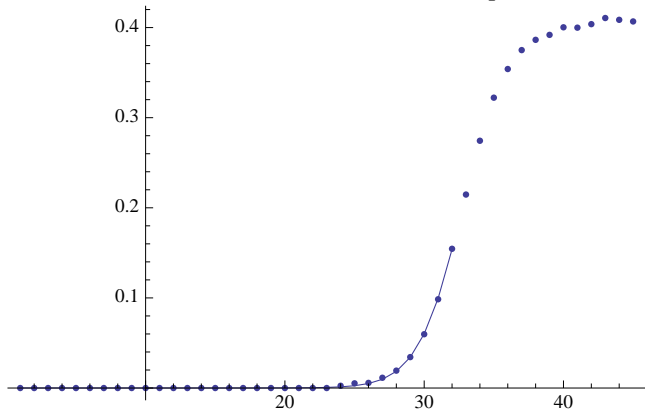

{d0 →  $7.5387 \times 10^{-11}$ , k → 0.0494609, base → 0.0000530316}

{Null}

**MAK2[X632data]**

c= -6

7.82491 10 i=450 t=0 loops=1

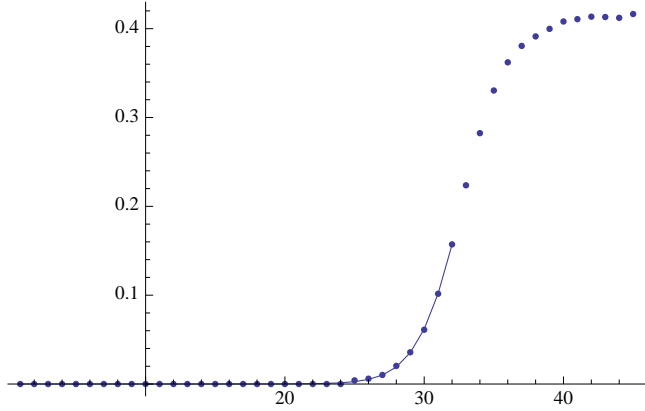

{d0 →  $7.84571 \times 10^{-11}$ , k → 0.048957, base → 0.0000569023}

{Null}

**MAK2[X633data]**

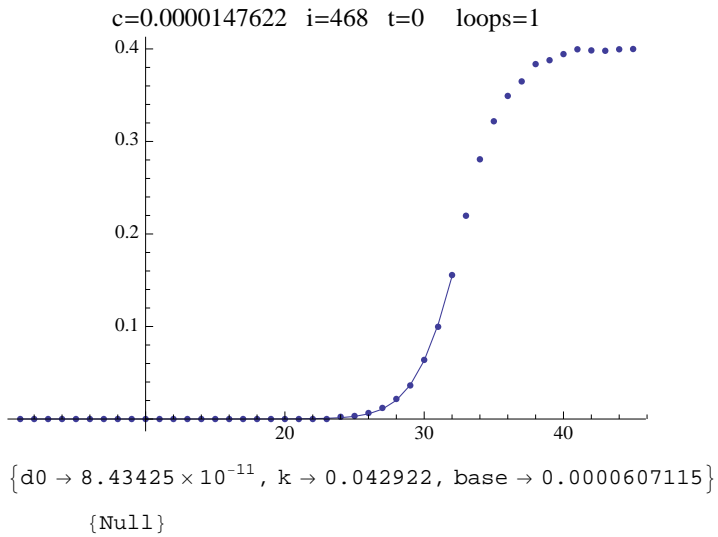

**MAK2[X634data]**

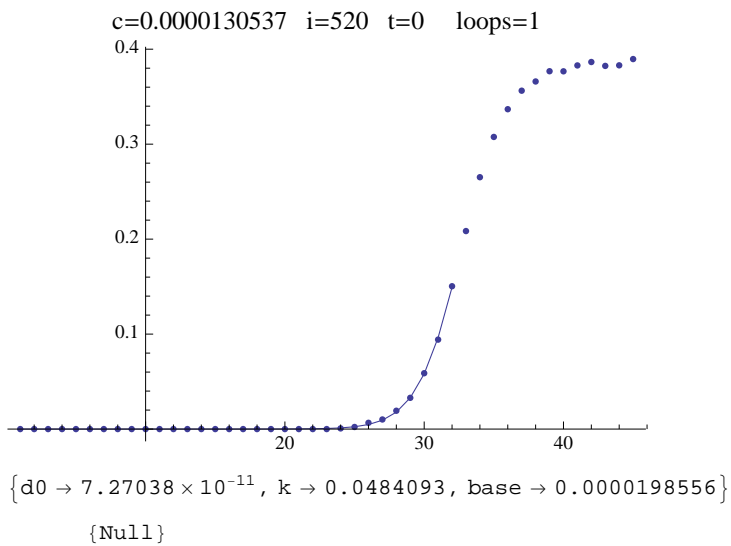

**MAK2[X641data]**

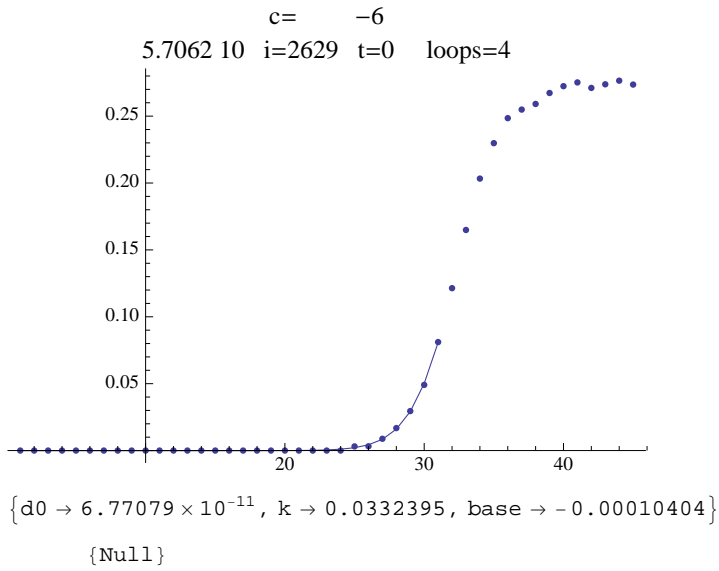

**MAK2[x642data]**

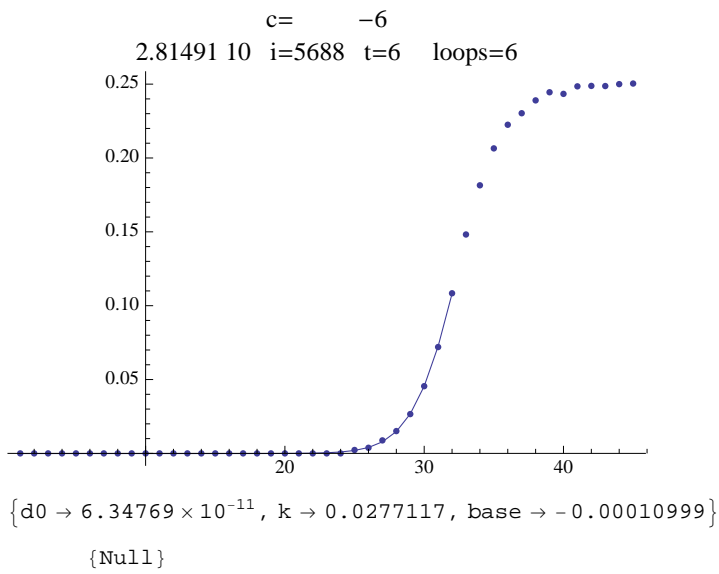

**MAK2[x643data]**

c=0.0000116747 i=372 t=0 loops=1

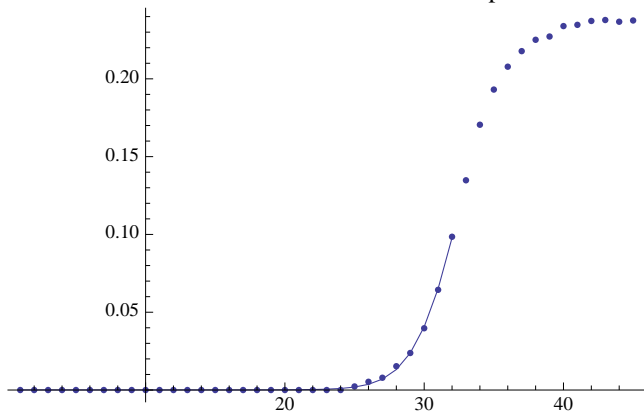

{d0 →  $5.5191 \times 10^{-11}$ , k → 0.0261687, base → 0.0000821592}

{Null}

**MAK2[x644data]**

c= -6

2.36496 10 i=5006 t=4 loops=6

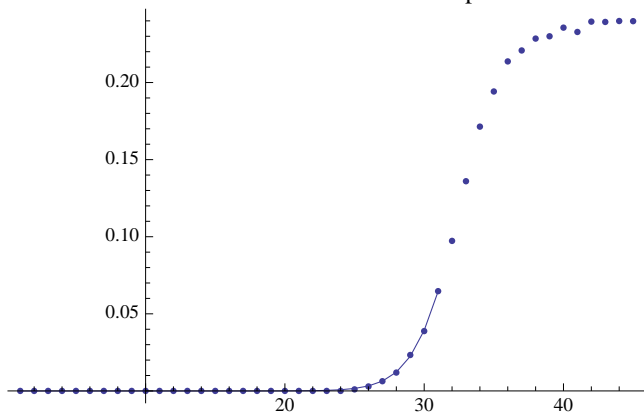

{d0 →  $5.03784 \times 10^{-11}$ , k → 0.0303454, base → -0.0000646715}

{Null}

**MAK2[x651data]**

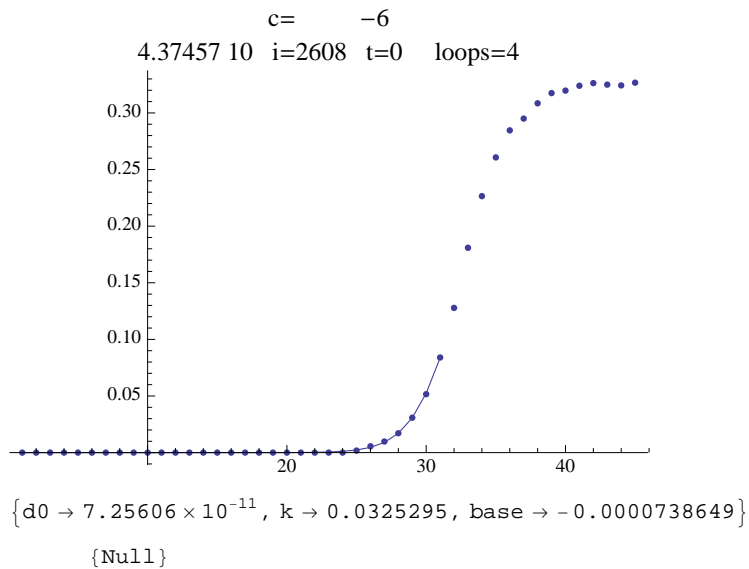

**MAK2[x652data]**

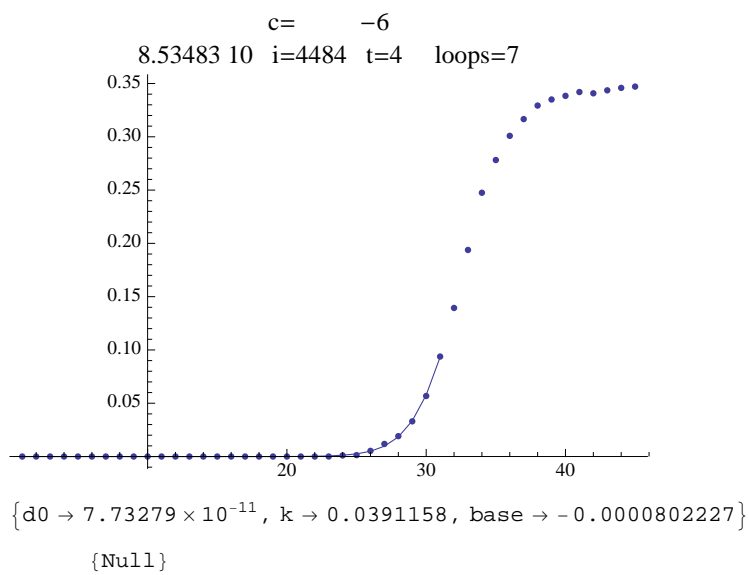

**MAK2[x653data]**

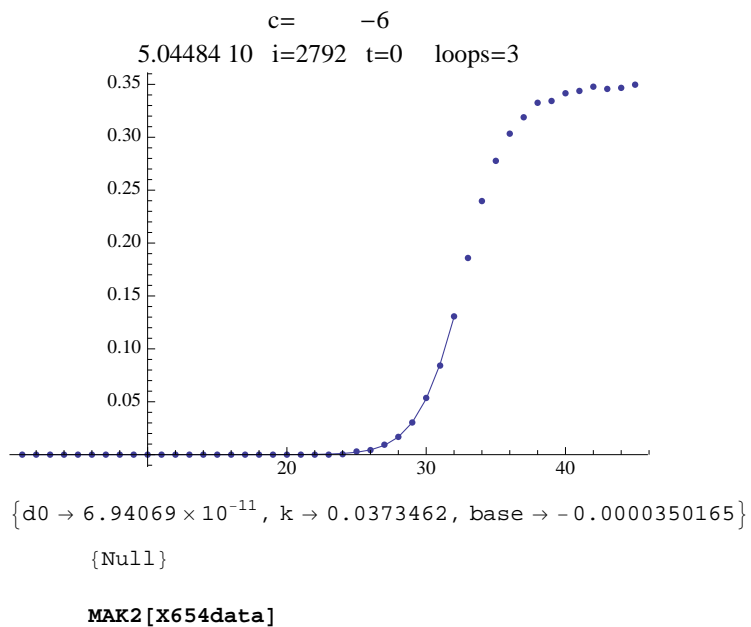



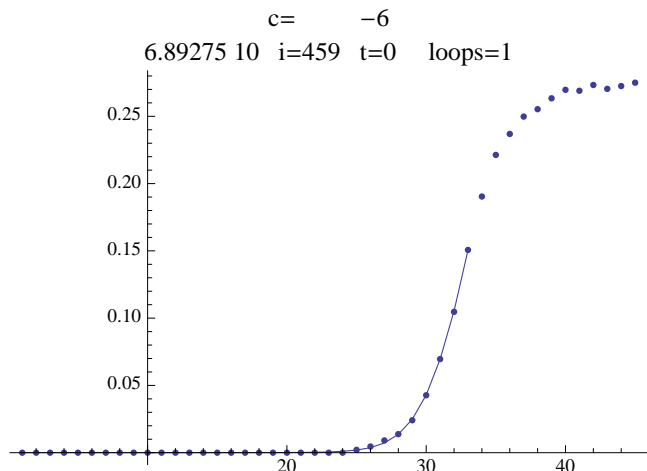

```
{d0 → 5.66489 × 10-11, k → 0.0298845, base → 0.0000617769}
```

```
{Null}
```

The following are data and trials from the 'reps.csv' dataset.

```
indata = Import["reps.csv"];
cycle = indata[[All, 1]][[2 ;;]];

F11data = Transpose[{cycle, indata[[All, 3]][[2 ;;]]}];
F12data = Transpose[{cycle, indata[[All, 4]][[2 ;;]]}];
F13data = Transpose[{cycle, indata[[All, 5]][[2 ;;]]}];
F14data = Transpose[{cycle, indata[[All, 6]][[2 ;;]]}];
F21data = Transpose[{cycle, indata[[All, 7]][[2 ;;]]}];
F22data = Transpose[{cycle, indata[[All, 8]][[2 ;;]]}];
F23data = Transpose[{cycle, indata[[All, 9]][[2 ;;]]}];
F24data = Transpose[{cycle, indata[[All, 10]][[2 ;;]]}];
F31data = Transpose[{cycle, indata[[All, 11]][[2 ;;]]}];
F32data = Transpose[{cycle, indata[[All, 12]][[2 ;;]]}];
F33data = Transpose[{cycle, indata[[All, 13]][[2 ;;]]}];
F34data = Transpose[{cycle, indata[[All, 14]][[2 ;;]]}];
F41data = Transpose[{cycle, indata[[All, 15]][[2 ;;]]}];
F42data = Transpose[{cycle, indata[[All, 16]][[2 ;;]]}];
F43data = Transpose[{cycle, indata[[All, 17]][[2 ;;]]}];
F44data = Transpose[{cycle, indata[[All, 18]][[2 ;;]]}];
F51data = Transpose[{cycle, indata[[All, 19]][[2 ;;]]}];
F52data = Transpose[{cycle, indata[[All, 20]][[2 ;;]]}];
F53data = Transpose[{cycle, indata[[All, 21]][[2 ;;]]}];
F54data = Transpose[{cycle, indata[[All, 22]][[2 ;;]]}];
F61data = Transpose[{cycle, indata[[All, 23]][[2 ;;]]}];
F62data = Transpose[{cycle, indata[[All, 24]][[2 ;;]]}];
F63data = Transpose[{cycle, indata[[All, 25]][[2 ;;]]}];
F64data = Transpose[{cycle, indata[[All, 26]][[2 ;;]]}];
F71data = Transpose[{cycle, indata[[All, 27]][[2 ;;]]}];
F72data = Transpose[{cycle, indata[[All, 28]][[2 ;;]]}];
F73data = Transpose[{cycle, indata[[All, 29]][[2 ;;]]}];
F74data = Transpose[{cycle, indata[[All, 30]][[2 ;;]]}];

MAK2[F11data]
```

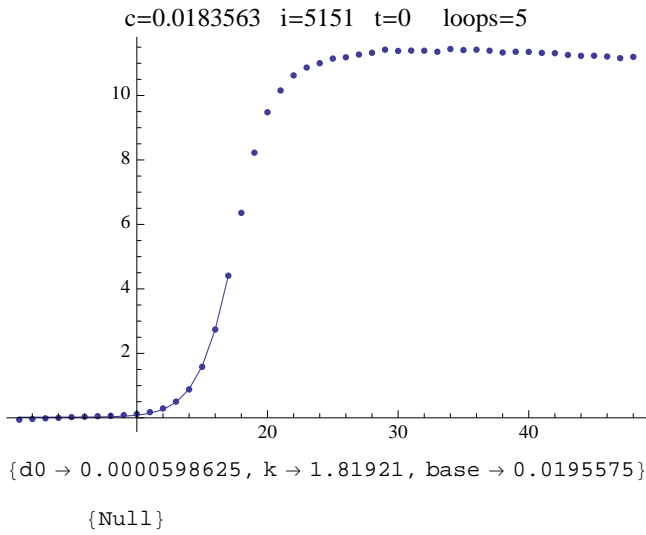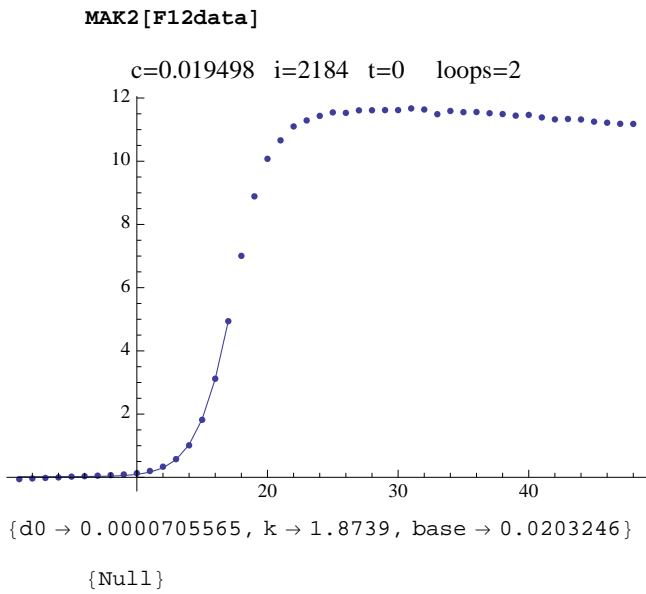

**MAK2[F13data]**

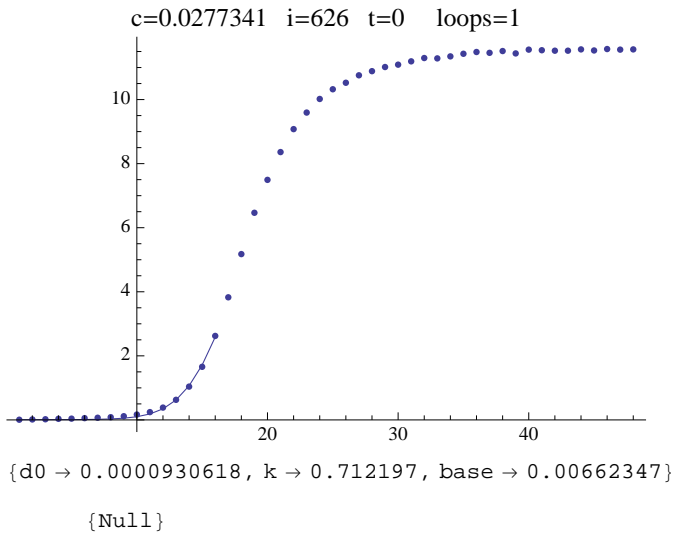

**MAK2[F14data]**

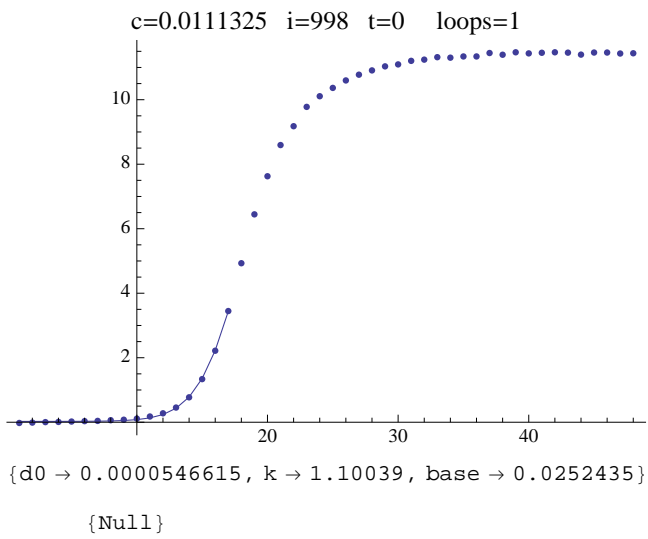

**MAK2[F21data]**

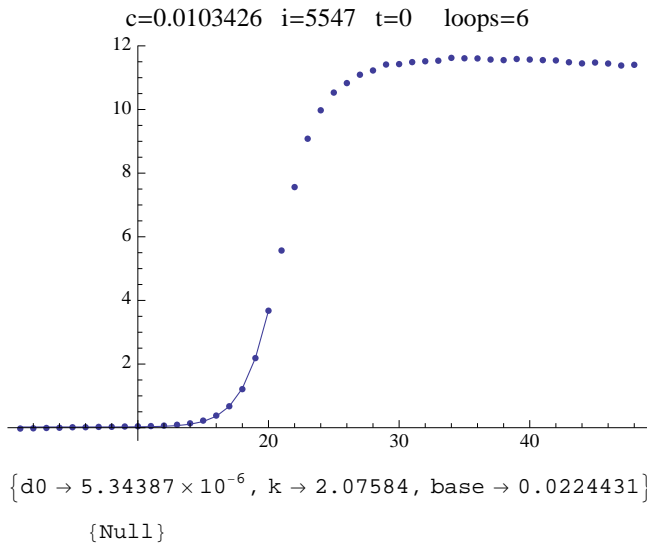

**MAK2[F22data]**

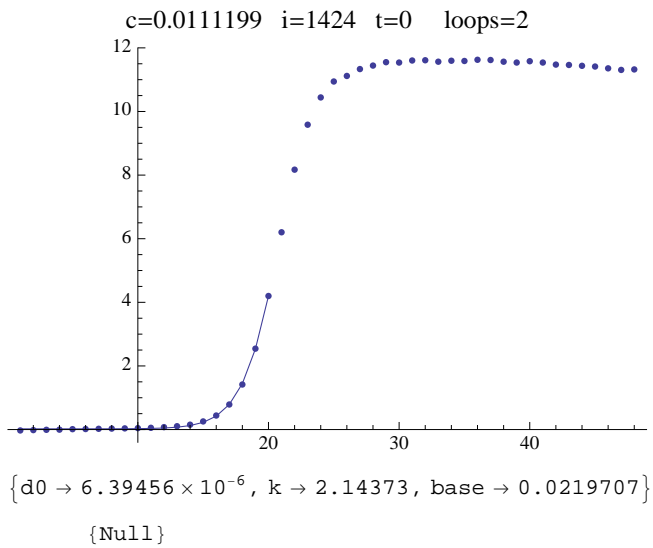

**MAK2[F23data]**

c=0.0209377 i=5002 t=4 loops=4

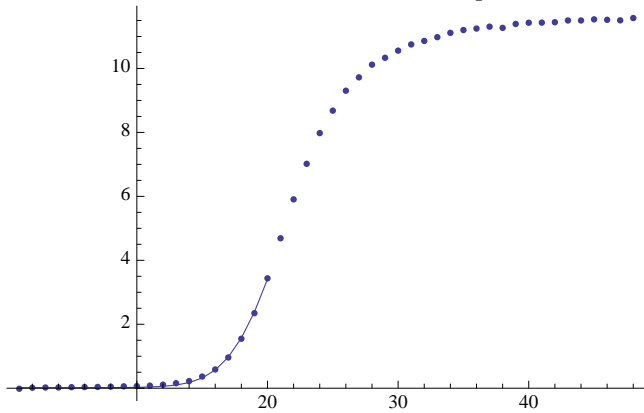

{d0 → 0.0000102571, k → 0.686167, base → 0.0175253}

{Null}

**MAK2[F24data]**

c=0.0220832 i=3096 t=0 loops=3

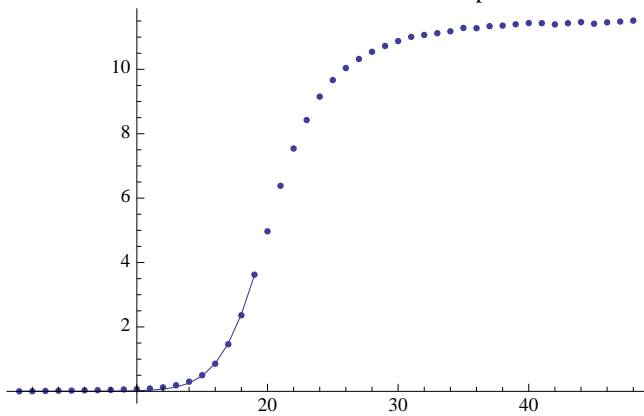

{d0 → 0.0000163518, k → 0.985408, base → 0.00281425}

{Null}

**MAK2[F31data]**

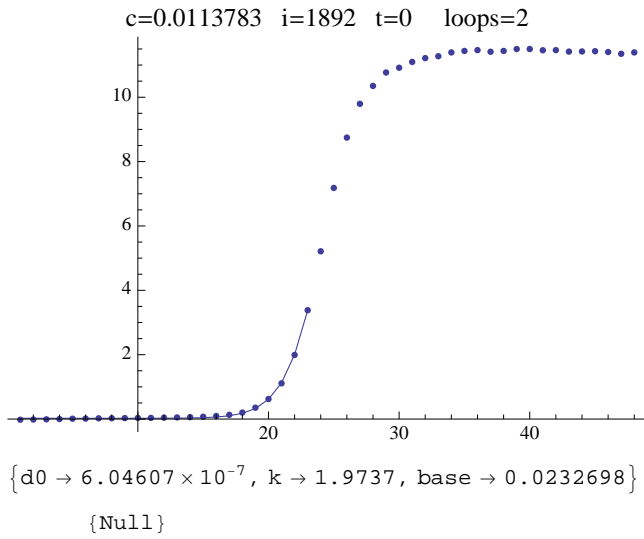

**MAK2[F32data]**

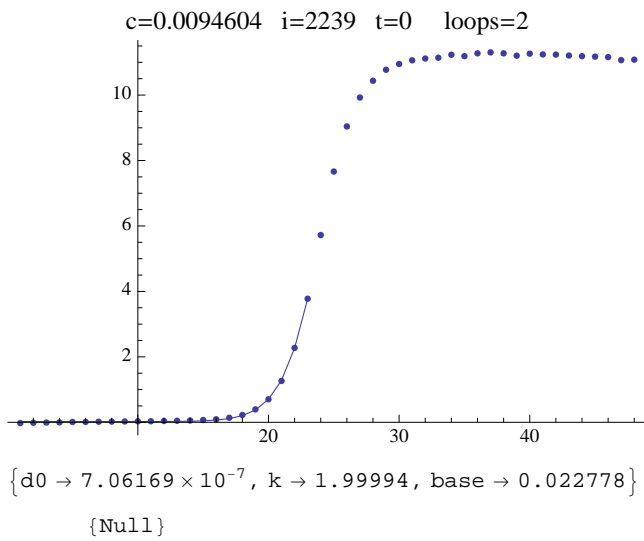

**MAK2[F33data]**

c=0.0311595 i=4027 t=5 loops=4

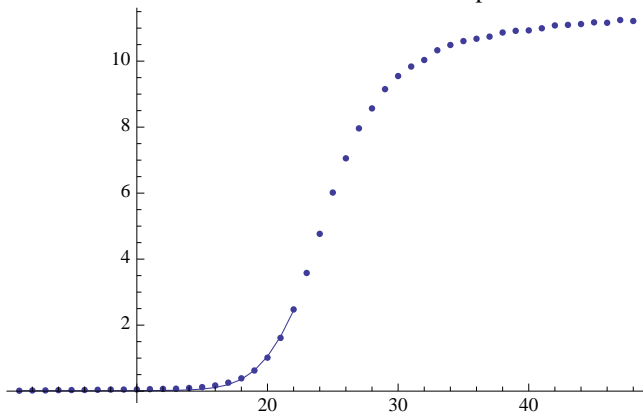

{d0 →  $1.50674 \times 10^{-6}$ , k → 0.601586, base → 0.0134873}

{Null}

**MAK2[F34data]**

c=0.0358389 i=1955 t=0 loops=2

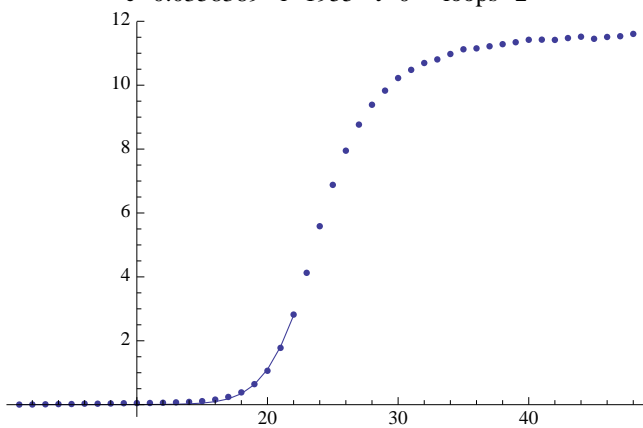

{d0 →  $1.43264 \times 10^{-6}$ , k → 0.868825, base → 0.00347211}

{Null}

**MAK2[F41data]**

c=0.0150711 i=2136 t=0 loops=2

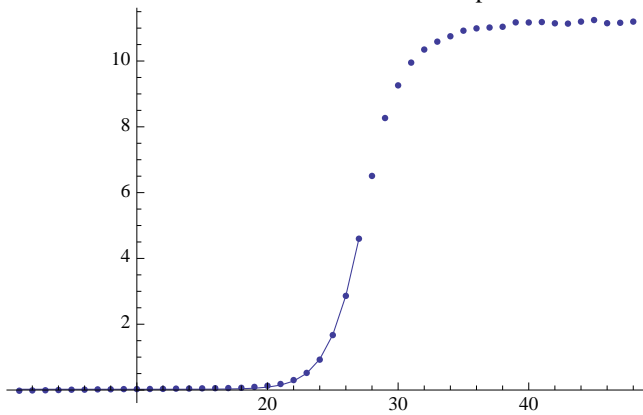

{d0 →  $6.1472 \times 10^{-8}$ , k → 1.86829, base → 0.0232914}

{Null}

**MAK2[F42data]**

c=0.0161348 i=977 t=0 loops=1

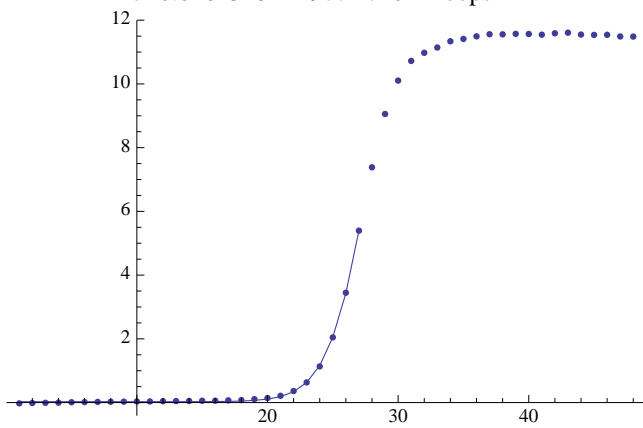

{d0 →  $7.80635 \times 10^{-8}$ , k → 1.9315, base → 0.0274261}

{Null}

**MAK2[F43data]**



c=0.050553 i=3874 t=0 loops=4

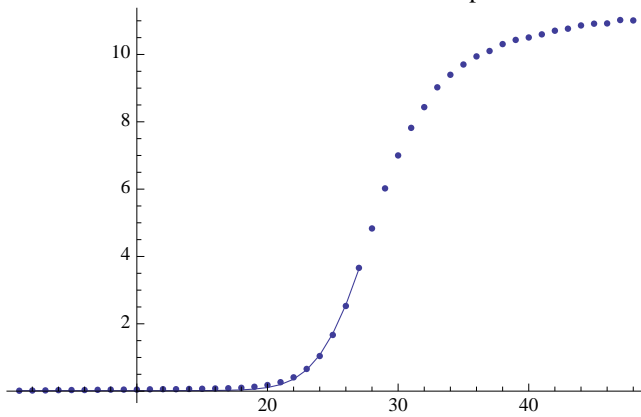

{d0 →  $9.203 \times 10^{-8}$ , k → 0.683405, base → 0.013557}

{Null}

c=0.0556355 i=1265 t=1 loops=1

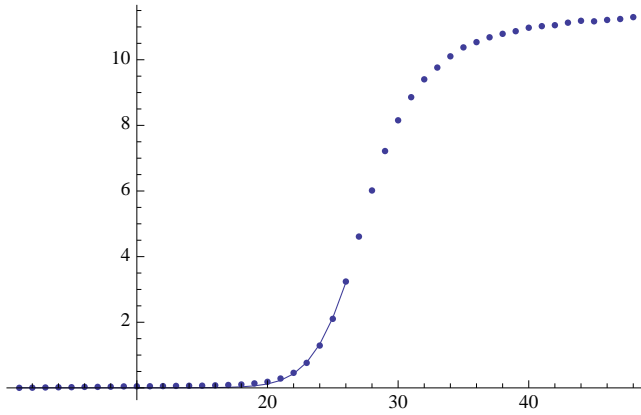

{d0 →  $1.15039 \times 10^{-7}$ , k → 0.867647, base → 0.00217796}

**MAK2[F51data]**

c=0.0477936 i=3168 t=0 loops=4

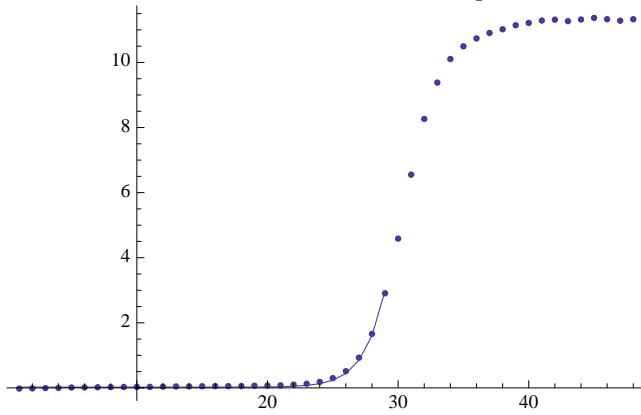

{d0 →  $6.38367 \times 10^{-9}$ , k → 4.97693, base → 0.0231121}

{Null}

**MAK2[F52data]**

c=0.0203987 i=944 t=0 loops=1

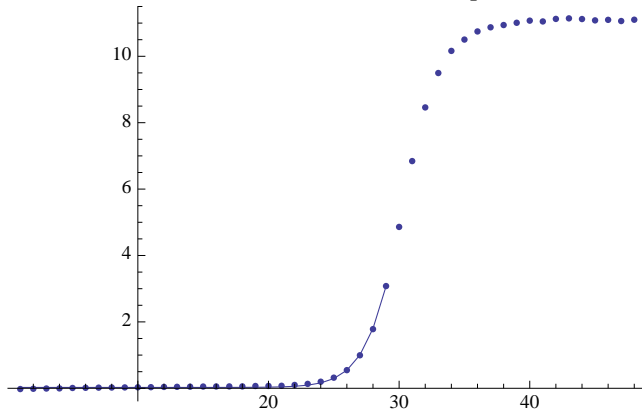

{d0 →  $8.23303 \times 10^{-9}$ , k → 1.99813, base → 0.025555}

{Null}

**MAK2[F53data]**

c=0.0409579 i=4204 t=4 loops=4

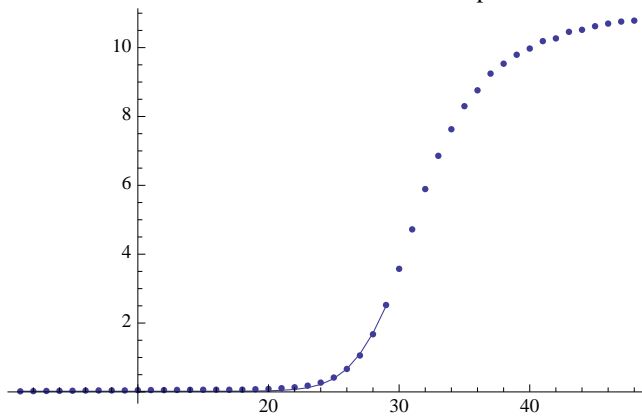

{d0 →  $1.28184 \times 10^{-8}$ , k → 0.569539, base → 0.0192616}

{Null}

**MAK2[F54data]**

c=0.0647214 i=4304 t=0 loops=5

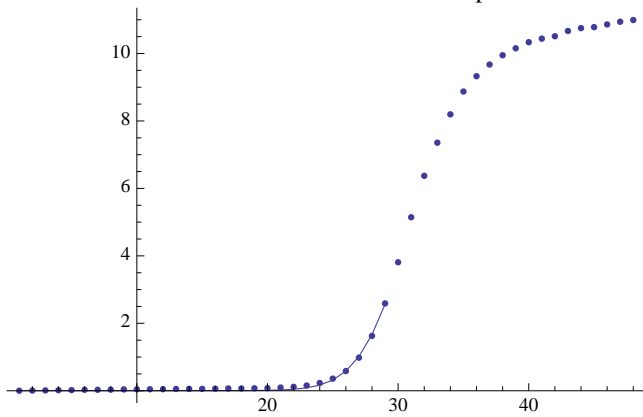

{d0 →  $1.04103 \times 10^{-8}$ , k → 0.782183, base → 0.00188566}

{Null}

**MAK2[F61data]**

c=0.030539 i=4330 t=0 loops=4

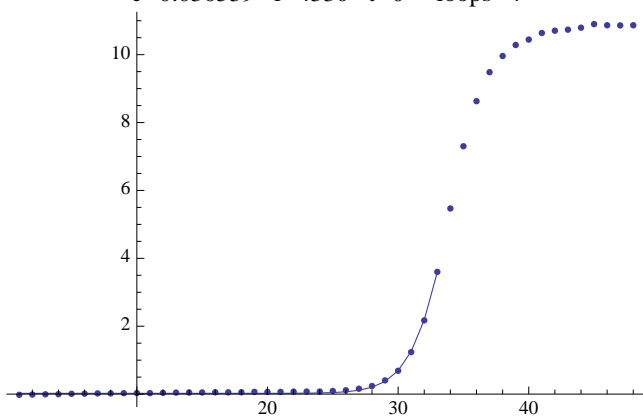

{d0 →  $6.85304 \times 10^{-10}$ , k → 1.72884, base → 0.0226451}

{Null}

**MAK2[F62data]**

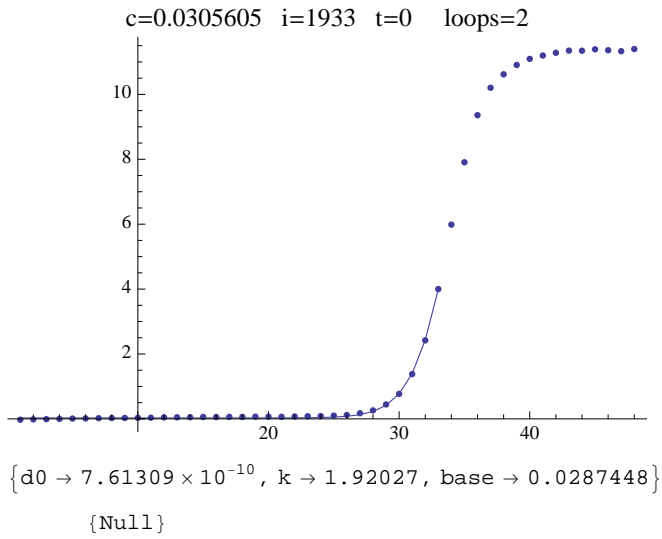

**MAK2[F63data]**

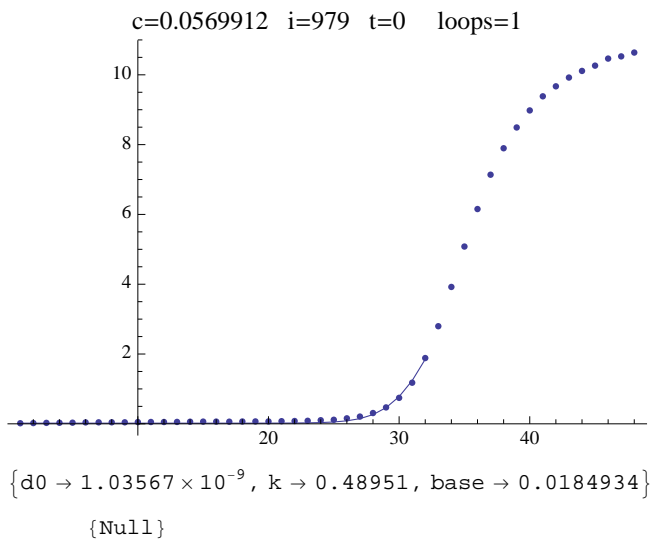

**MAK2[F64data]**

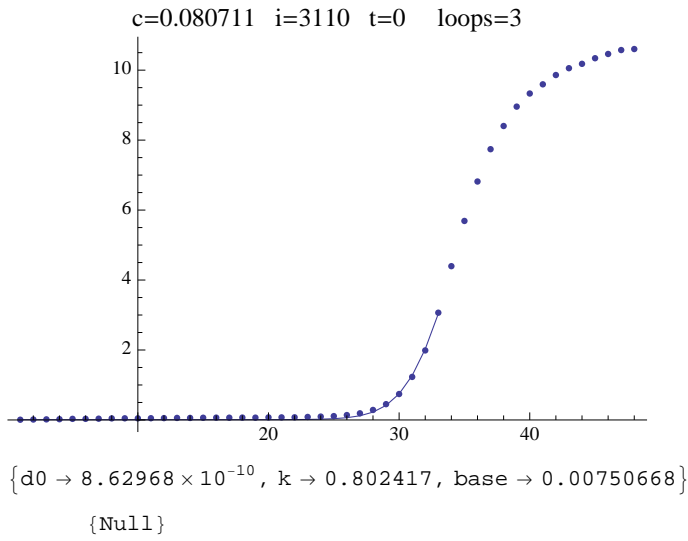

**MAK2[F71data]**

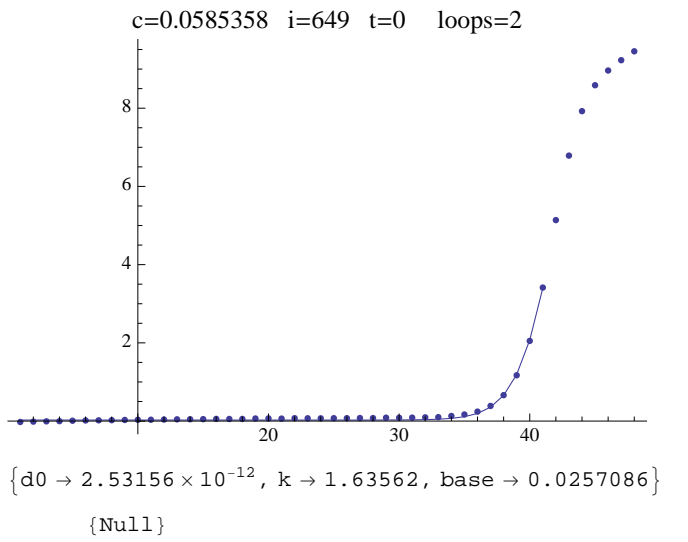

**MAK2[F72data]**

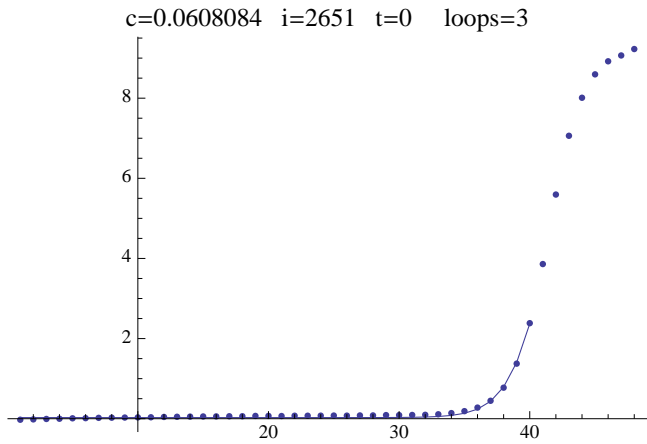

{d0 →  $3.17764 \times 10^{-12}$ , k → 1.42958, base → 0.0279425}

{Null}

**MAK2[F73data]**

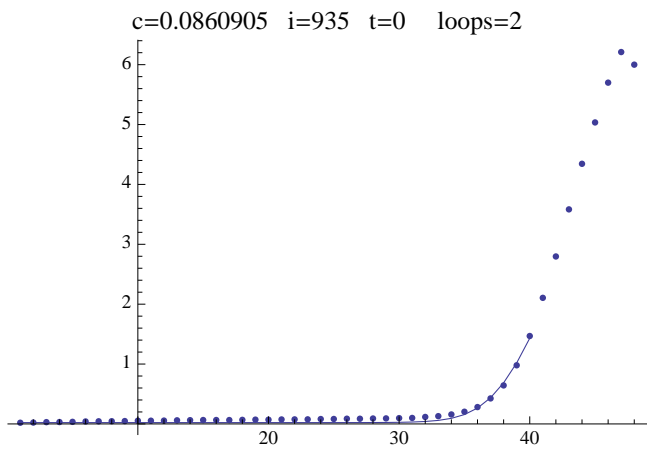

{d0 →  $4.43143 \times 10^{-12}$ , k → 0.264402, base → 0.0220891}

{Null}

**MAK2[F74data]**

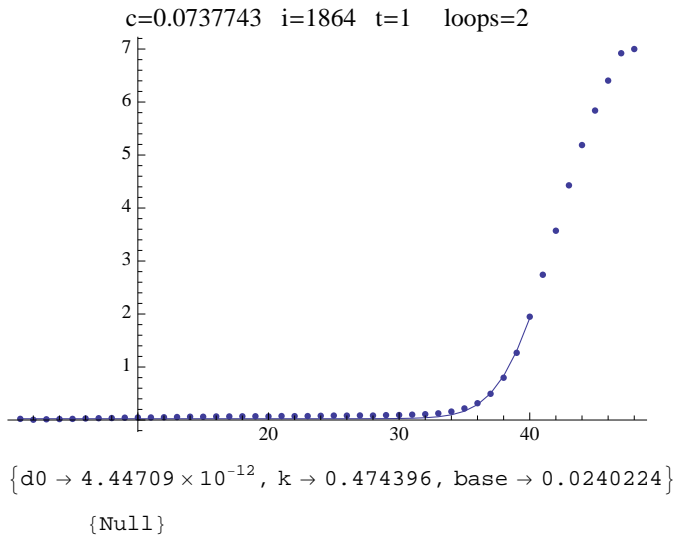

Supplement: pone.0012355.s005.pdf [file pone.0012355.s005.pdf]
