# Supplementary material for: A Mechanistic Model of PCR for Accurate Quantification of Quantitative PCR Data
Source: PubMed Central journal article supplement (PMC2930010; doi:10.1371/journal.pone.0012355), 2010-08-30

```

(*****)
(* This Mathematica notebook contains trials of fitting qPCR data with an exponential model. *)
(* The 'd0' values resulting from these trials are used to develop the plots in figure 3 of the MAK2 paper. *)
(* *)
(*****
Written by Gregory Boggy (November 2009)
*****)
(*****)

```

```

filepath = "Desktop/supplement/";
SetDirectory[filepath];
indata = Import["growth.csv"];
cycle = indata[[All, 1]];

```

```

D3data = Transpose[{cycle, indata[[All, 2]]}][[2 ;; 41]];
D4data = Transpose[{cycle, indata[[All, 3]]}][[2 ;; 41]];
D5data = Transpose[{cycle, indata[[All, 4]]}][[2 ;; 41]];
D6data = Transpose[{cycle, indata[[All, 5]]}][[2 ;; 41]];
D7data = Transpose[{cycle, indata[[All, 6]]}][[2 ;; 41]];
D8data = Transpose[{cycle, indata[[All, 7]]}][[2 ;; 41]];
E3data = Transpose[{cycle, indata[[All, 8]]}][[2 ;; 41]];
E4data = Transpose[{cycle, indata[[All, 9]]}][[2 ;; 41]];
E5data = Transpose[{cycle, indata[[All, 10]]}][[2 ;; 41]];
E6data = Transpose[{cycle, indata[[All, 11]]}][[2 ;; 41]];
E7data = Transpose[{cycle, indata[[All, 12]]}][[2 ;; 41]];
E8data = Transpose[{cycle, indata[[All, 13]]}][[2 ;; 41]];

```

```

D3exp = NonlinearModelFit[D3data[[1 ;; 28]], b + d0 * a^x, {b, d0, a}, x, MaxIterations -> 1000]

```

```

FittedModel[0.193431 + 2.77761 × 10-7 <<19>>x]

```

```

D3exp["BestFit"]

```

$$0.193431 + 2.77761 \times 10^{-7} 1.61913^x$$

```

Show[ListPlot[D3data[[1 ;; 28]], PlotRange -> All], Plot[D3exp[x], {x, 1, 31}]]

```

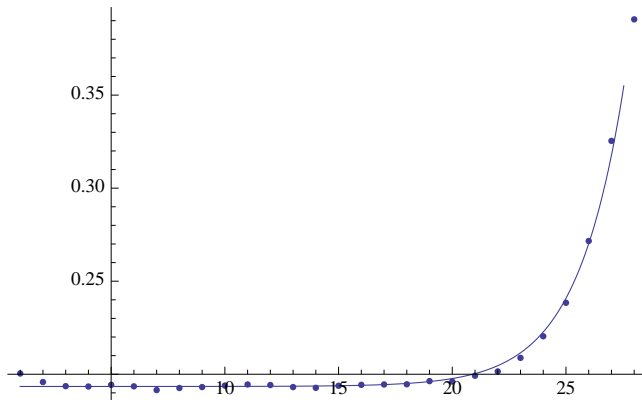

```

D4exp = NonlinearModelFit[D4data[[1 ;; 24]], b + d0 * a^x, {b, d0, a}, x, MaxIterations -> 10000]

```

```

FittedModel[0.193799 + 2.99676 × 10-7 <<19>>x]

```

**D4exp["BestFit"]**

$0.193799 + 2.99676 \times 10^{-7} 1.74385^x$

**Show[ListPlot[D4data[[1 ;; 24]], PlotRange -> All], Plot[D4exp[x], {x, 1, 28}]]**

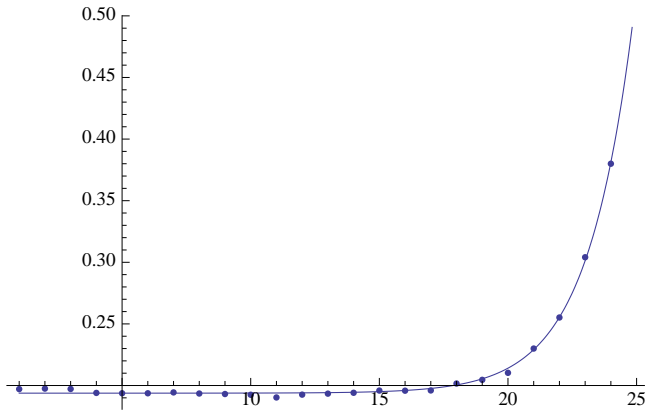

**D5exp = NonlinearModelFit[D5data[[1 ;; 20]], b + d0 \* a^x, {b, d0, a}, x, MaxIterations -> 10 000]**

FittedModel [  $0.195746 + 1.08399 \times 10^{-6} \ll 18 \gg^x$  ]

**D5exp["BestFit"]**

$0.195746 + 1.08399 \times 10^{-6} 1.82639^x$

**Show[ListPlot[D5data[[1 ;; 20]], PlotRange -> All], Plot[D5exp[x], {x, 1, 23}]]**

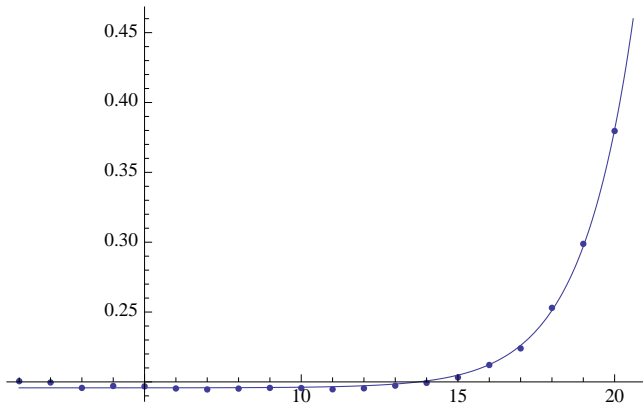

**D6exp = NonlinearModelFit[D6data[[1 ;; 17]], b + d0 \* a^x, {b, d0, a}, x, MaxIterations -> 10 000]**

FittedModel [  $0.191898 + 4.55187 \times 10^{-6} \ll 19 \gg^x$  ]

**D6exp["BestFit"]**

$0.191898 + 4.55187 \times 10^{-6} 1.86618^x$

```
Show[ListPlot[D6data[[1 ;; 17]], PlotRange -> All], Plot[D6exp[x], {x, 1, 19}]]
```

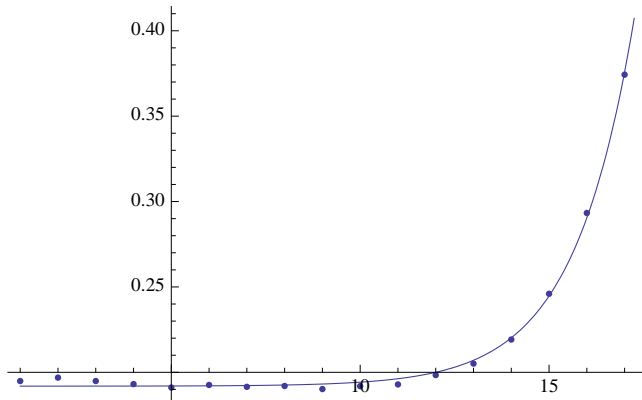

```
D7exp = NonlinearModelFit[D7data[[1 ;; 13]], b + d0 * a^x, {b, d0, a}, x, MaxIterations -> 1000]
```

```
FittedModel [ 0.196345 + 0.0000262309 <<19>>^x ]
```

```
D7exp["BestFit"]
```

```
0.196345 + 0.0000262309 1.95542^x
```

```
Show[ListPlot[D7data[[1 ;; 13]], PlotRange -> All], Plot[D7exp[x], {x, 1, 15}]]
```

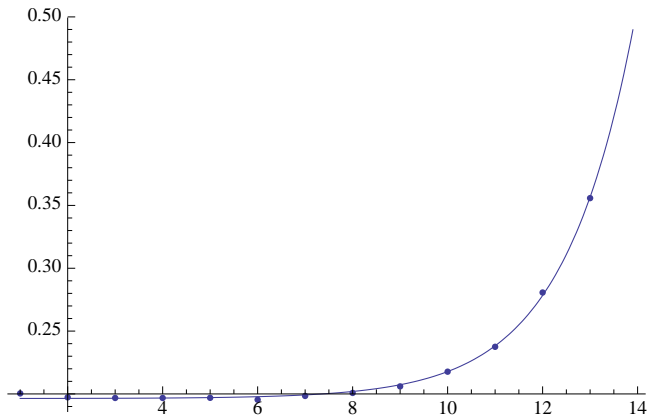

```
D8exp = NonlinearModelFit[D8data[[1 ;; 10]], b + d0 * a^x, {b, d0, a}, x, MaxIterations -> 10 000]
```

```
FittedModel [ 0.194705 + 0.000267799 <<19>>^x ]
```

```
D8exp["BestFit"]
```

```
0.194705 + 0.000267799 1.94344^x
```

```
Show[ListPlot[D8data[[1 ;; 10]], PlotRange -> All], Plot[D8exp[x], {x, 1, 10}]]
```

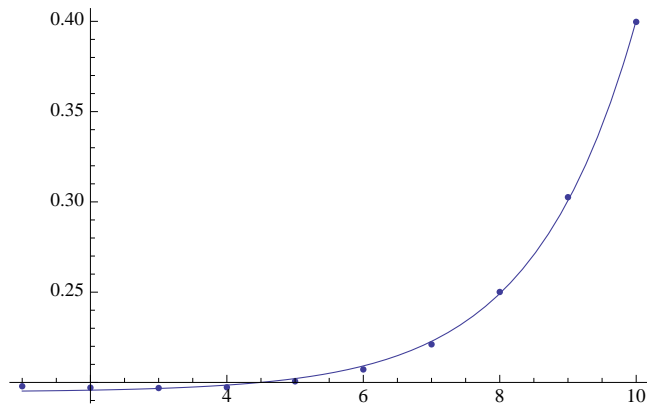

```
E3exp = NonlinearModelFit[E3data[[1 ;; 28]], b + d0 * a^x, {b, d0, a}, x, MaxIterations -> 10 000]
```

```
FittedModel [ 0.188313 + 4.72056 × 10-8 <<18>>x ]
```

```
E3exp["BestFit"]
```

```
0.188313 + 4.72056 × 10-8 1.72559x
```

```
Show[ListPlot[E3data[[1 ;; 28]], PlotRange -> All], Plot[E3exp[x], {x, 1, 31}]]
```

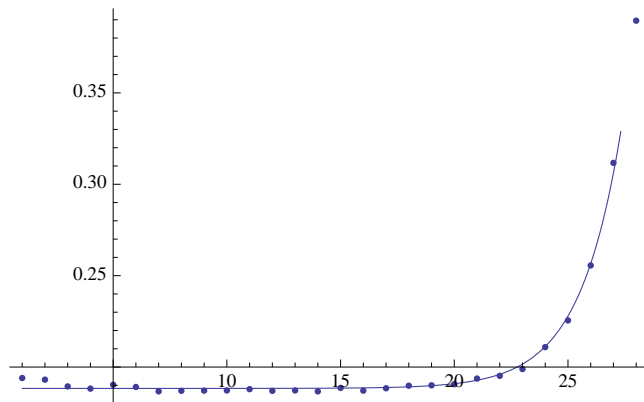

```
E4exp = NonlinearModelFit[E4data[[1 ;; 24]], b + d0 * a^x, {b, d0, a}, x, MaxIterations -> 10 000]
```

```
FittedModel [ 0.196468 + 1.87325 × 10-7 <<18>>x ]
```

```
E4exp["BestFit"]
```

```
0.196468 + 1.87325 × 10-7 1.79141x
```

```
Show[ListPlot[E4data[[1 ;; 24]], PlotRange -> All], Plot[E4exp[x], {x, 1, 28}]]
```

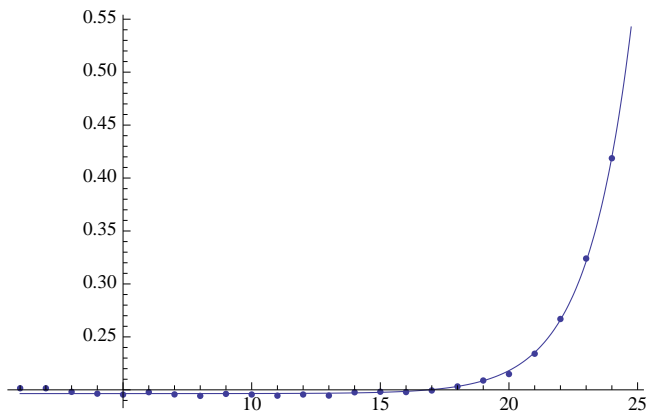

```
E5exp = NonlinearModelFit[E5data[[1 ;; 20]], b + d0 * a^x, {b, d0, a}, x, MaxIterations -> 10 000]
```

```
FittedModel [ 0.195601 + 1.61624 × 10-6 <<19>>x ]
```

```
E5exp["BestFit"]
```

```
0.195601 + 1.61624 × 10-6 1.79682x
```

```
Show[ListPlot[E5data[[1 ;; 20]], PlotRange -> All], Plot[E5exp[x], {x, 1, 23}]]
```

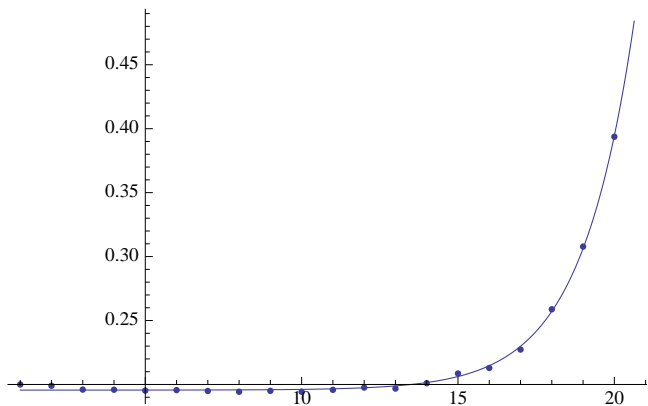

```
E6exp = NonlinearModelFit[E6data[[1 ;; 17]], b + d0 * a^x, {b, d0, a}, x, MaxIterations -> 10 000]
```

```
FittedModel [ 0.191688 + 5.26034 × 10-6 <<18>>x ]
```

```
E6exp["BestFit"]
```

```
0.191688 + 5.26034 × 10-6 1.8553x
```

```
Show[ListPlot[E6data[[1 ;; 17]], PlotRange -> All], Plot[E6exp[x], {x, 1, 19}]]
```

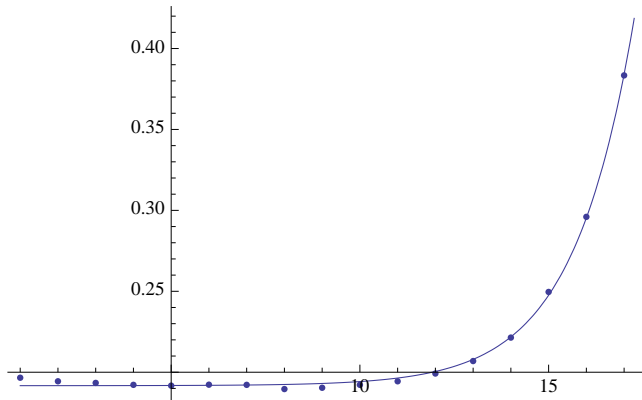

```
E7exp = NonlinearModelFit[E7data[[1 ;; 13]], b + d0 * a^x, {b, d0, a}, x, MaxIterations -> 10 000]
```

```
FittedModel [ 0.190447 + 0.0000264797 <<19>>^x ]
```

```
E7exp["BestFit"]
```

```
0.190447 + 0.0000264797 1.94885^x
```

```
Show[ListPlot[E7data[[1 ;; 13]], PlotRange -> All], Plot[E7exp[x], {x, 1, 15}]]
```

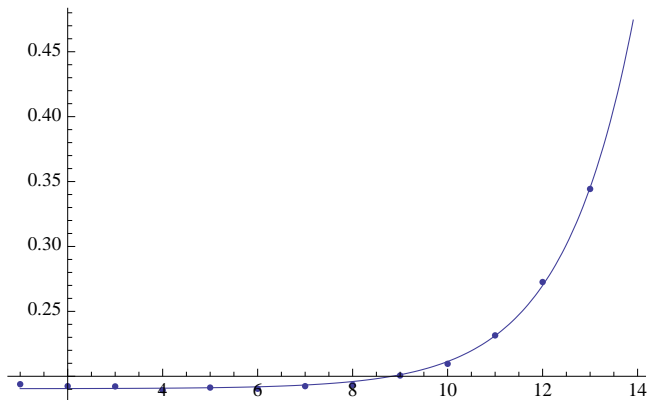

```
E8exp = NonlinearModelFit[E8data[[1 ;; 10]], b + d0 * a^x, {b, d0, a}, x, MaxIterations -> 10 000]
```

```
FittedModel [ 0.200804 + 0.000345749 <<18>>^x ]
```

```
E8exp["BestFit"]
```

```
0.200804 + 0.000345749 1.91906^x
```

```
Show[ListPlot[E8data[[1 ;; 10]], PlotRange -> All], Plot[E8exp[x], {x, 1, 10}]]
```

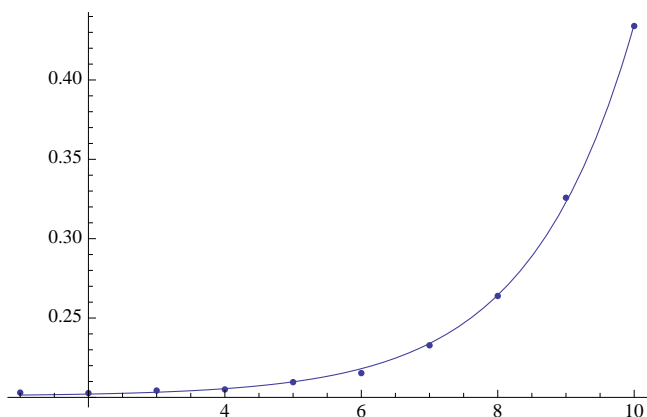

```
indata = Import["rutledge.csv"];
cycle = indata[[All, 1]][[2 ;;]];

```

```
X111data = Transpose[{cycle, indata[[All, 3]][[2 ;;]]};
X112data = Transpose[{cycle, indata[[All, 4]][[2 ;;]]};
X113data = Transpose[{cycle, indata[[All, 5]][[2 ;;]]};
X114data = Transpose[{cycle, indata[[All, 6]][[2 ;;]]};
X121data = Transpose[{cycle, indata[[All, 7]][[2 ;;]]};
X122data = Transpose[{cycle, indata[[All, 8]][[2 ;;]]};
X123data = Transpose[{cycle, indata[[All, 9]][[2 ;;]]};
X124data = Transpose[{cycle, indata[[All, 10]][[2 ;;]]};
X131data = Transpose[{cycle, indata[[All, 11]][[2 ;;]]};
X132data = Transpose[{cycle, indata[[All, 12]][[2 ;;]]};
X133data = Transpose[{cycle, indata[[All, 13]][[2 ;;]]};
X134data = Transpose[{cycle, indata[[All, 14]][[2 ;;]]};
X141data = Transpose[{cycle, indata[[All, 15]][[2 ;;]]};
X142data = Transpose[{cycle, indata[[All, 16]][[2 ;;]]};
X143data = Transpose[{cycle, indata[[All, 17]][[2 ;;]]};
X144data = Transpose[{cycle, indata[[All, 18]][[2 ;;]]};
X151data = Transpose[{cycle, indata[[All, 19]][[2 ;;]]};
X152data = Transpose[{cycle, indata[[All, 20]][[2 ;;]]};
X153data = Transpose[{cycle, indata[[All, 21]][[2 ;;]]};
X154data = Transpose[{cycle, indata[[All, 22]][[2 ;;]]};
X211data = Transpose[{cycle, indata[[All, 23]][[2 ;;]]};
X212data = Transpose[{cycle, indata[[All, 24]][[2 ;;]]};
```





```

X442data = Transpose[{cycle, indata[[All, 76]][[2 ;;]]}];
X443data = Transpose[{cycle, indata[[All, 77]][[2 ;;]]}];
X444data = Transpose[{cycle, indata[[All, 78]][[2 ;;]]}];
X451data = Transpose[{cycle, indata[[All, 79]][[2 ;;]]}];
X452data = Transpose[{cycle, indata[[All, 80]][[2 ;;]]}];
X453data = Transpose[{cycle, indata[[All, 81]][[2 ;;]]}];
X454data = Transpose[{cycle, indata[[All, 82]][[2 ;;]]}];
X511data = Transpose[{cycle, indata[[All, 83]][[2 ;;]]}];
X512data = Transpose[{cycle, indata[[All, 84]][[2 ;;]]}];
X513data = Transpose[{cycle, indata[[All, 85]][[2 ;;]]}];
X514data = Transpose[{cycle, indata[[All, 86]][[2 ;;]]}];
X521data = Transpose[{cycle, indata[[All, 87]][[2 ;;]]}];
X522data = Transpose[{cycle, indata[[All, 88]][[2 ;;]]}];
X523data = Transpose[{cycle, indata[[All, 89]][[2 ;;]]}];
X524data = Transpose[{cycle, indata[[All, 90]][[2 ;;]]}];
X531data = Transpose[{cycle, indata[[All, 91]][[2 ;;]]}];
X532data = Transpose[{cycle, indata[[All, 92]][[2 ;;]]}];
X533data = Transpose[{cycle, indata[[All, 93]][[2 ;;]]}];
X534data = Transpose[{cycle, indata[[All, 94]][[2 ;;]]}];
X541data = Transpose[{cycle, indata[[All, 95]][[2 ;;]]}];
X542data = Transpose[{cycle, indata[[All, 96]][[2 ;;]]}];
X543data = Transpose[{cycle, indata[[All, 97]][[2 ;;]]}];
X544data = Transpose[{cycle, indata[[All, 98]][[2 ;;]]}];
X551data = Transpose[{cycle, indata[[All, 99]][[2 ;;]]}];
X552data = Transpose[{cycle, indata[[All, 100]][[2 ;;]]}];
X553data = Transpose[{cycle, indata[[All, 101]][[2 ;;]]}];
X554data = Transpose[{cycle, indata[[All, 102]][[2 ;;]]}];
X611data = Transpose[{cycle, indata[[All, 103]][[2 ;;]]}];
X612data = Transpose[{cycle, indata[[All, 104]][[2 ;;]]}];
X613data = Transpose[{cycle, indata[[All, 105]][[2 ;;]]}];
X614data = Transpose[{cycle, indata[[All, 106]][[2 ;;]]}];
X621data = Transpose[{cycle, indata[[All, 107]][[2 ;;]]}];
X622data = Transpose[{cycle, indata[[All, 108]][[2 ;;]]}];
X623data = Transpose[{cycle, indata[[All, 109]][[2 ;;]]}];
X624data = Transpose[{cycle, indata[[All, 110]][[2 ;;]]}];
X631data = Transpose[{cycle, indata[[All, 111]][[2 ;;]]}];
X632data = Transpose[{cycle, indata[[All, 112]][[2 ;;]]}];
X633data = Transpose[{cycle, indata[[All, 113]][[2 ;;]]}];
X634data = Transpose[{cycle, indata[[All, 114]][[2 ;;]]}];
X641data = Transpose[{cycle, indata[[All, 115]][[2 ;;]]}];
X642data = Transpose[{cycle, indata[[All, 116]][[2 ;;]]}];
X643data = Transpose[{cycle, indata[[All, 117]][[2 ;;]]}];
X644data = Transpose[{cycle, indata[[All, 118]][[2 ;;]]}];
X651data = Transpose[{cycle, indata[[All, 119]][[2 ;;]]}];
X652data = Transpose[{cycle, indata[[All, 120]][[2 ;;]]}];
X653data = Transpose[{cycle, indata[[All, 121]][[2 ;;]]}];
X654data = Transpose[{cycle, indata[[All, 122]][[2 ;;]]}];

X111exp =
  NonlinearModelFit[X111data[[1 ;; 14]], b + d0 * a^x, {b, d0, a}, x, MaxIterations -> 1000]

FittedModel[-0.00219 + 0.000191693 <<19>>^x]

X111exp["BestFit"]

-0.00219 + 0.000191693 1.62508^x

```

```
Show[ListPlot[X111data[[1 ;; 14]], PlotRange -> All], Plot[X111exp[x], {x, 1, 15}]]
```

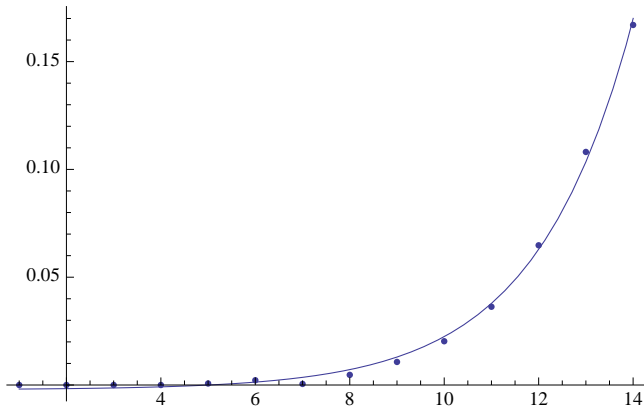

```
X112exp =
NonlinearModelFit[X112data[[1 ;; 14]], b + d0 * a^x, {b, d0, a}, x, MaxIterations -> 1000]
```

```
FittedModel[
$$-0.00238513 + 0.000226237 \ll 19 \gg^x$$
]
```

```
X112exp["BestFit"]
```

```

$$-0.00238513 + 0.000226237 1.62638^x$$

```

```
Show[ListPlot[X112data[[1 ;; 14]], PlotRange -> All], Plot[X112exp[x], {x, 1, 15}]]
```

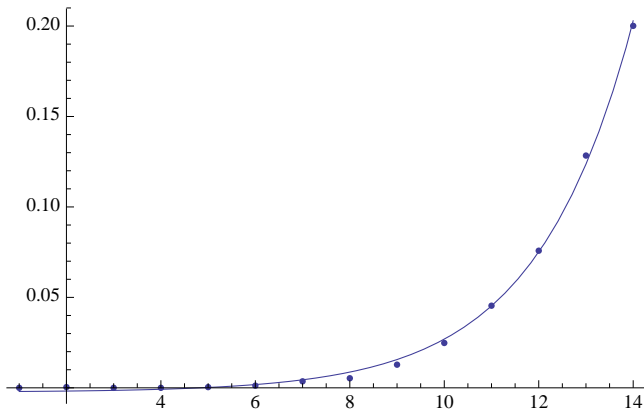

```
X113exp =
NonlinearModelFit[X113data[[1 ;; 14]], b + d0 * a^x, {b, d0, a}, x, MaxIterations -> 1000]
```

```
FittedModel[
$$-0.00191785 + 0.000166168 \ll 18 \gg^x$$
]
```

```
X113exp["BestFit"]
```

```

$$-0.00191785 + 0.000166168 1.6501^x$$

```

```
Show[ListPlot[X113data[[1 ;; 14]], PlotRange -> All], Plot[X113exp[x], {x, 1, 15}]]
```

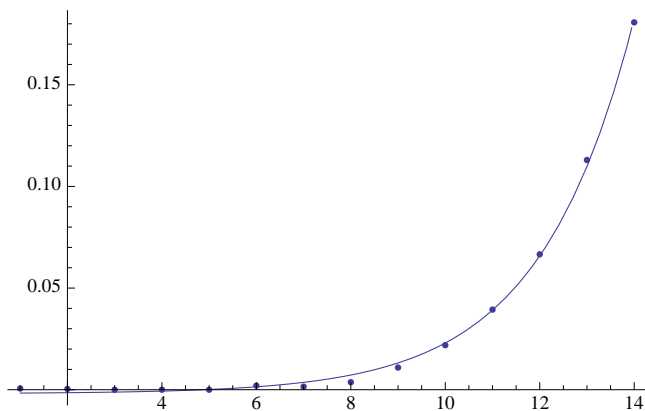

```
X114exp =
NonlinearModelFit[X114data[[1 ;; 14]], b + d0 * a^x, {b, d0, a}, x, MaxIterations -> 1000]
```

```
FittedModel[[-0.0020944 + 0.000187687 <<19>>^x]]
```

```
X114exp["BestFit"]
```

```
-0.0020944 + 0.000187687 1.63819^x
```

```
Show[ListPlot[X114data[[1 ;; 14]], PlotRange -> All], Plot[X114exp[x], {x, 1, 15}]]
```

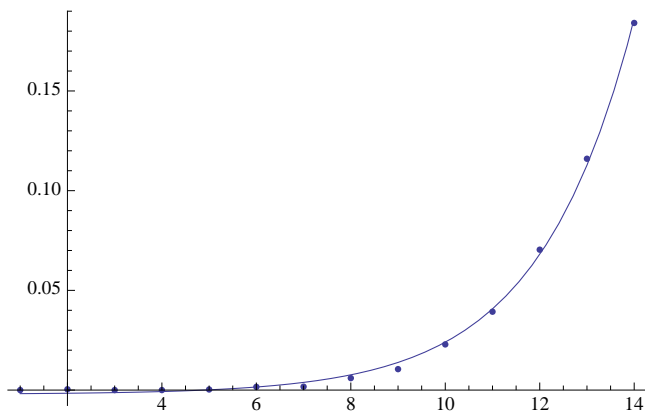

```
X121exp =
NonlinearModelFit[X121data[[1 ;; 14]], b + d0 * a^x, {b, d0, a}, x, MaxIterations -> 1000]
```

```
FittedModel[[-0.00161267 + 0.000160324 <<19>>^x]]
```

```
X121exp["BestFit"]
```

```
-0.00161267 + 0.000160324 1.62227^x
```

```
Show[ListPlot[X121data[[1 ;; 14]], PlotRange -> All], Plot[X121exp[x], {x, 1, 15}]]
```

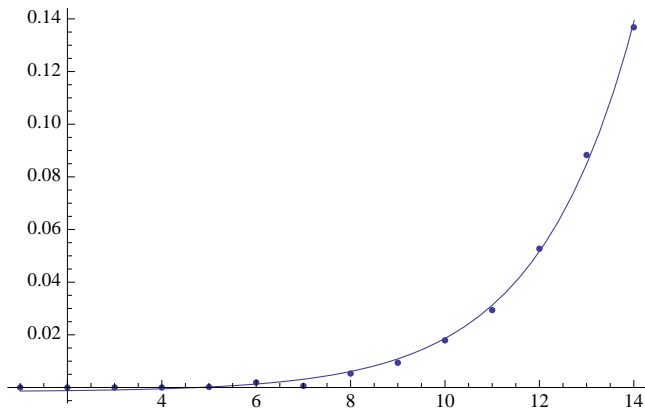

```
X122exp =  
NonlinearModelFit[X122data[[1 ;; 14]], b + d0 * a^x, {b, d0, a}, x, MaxIterations -> 1000]
```

```
FittedModel[  
-0.00145194 + 0.000118936 <<19>>^x  
]
```

```
X122exp["BestFit"]
```

```
-0.00145194 + 0.000118936 1.66126^x
```

```
Show[ListPlot[X122data[[1 ;; 14]], PlotRange -> All], Plot[X122exp[x], {x, 1, 15}]]
```

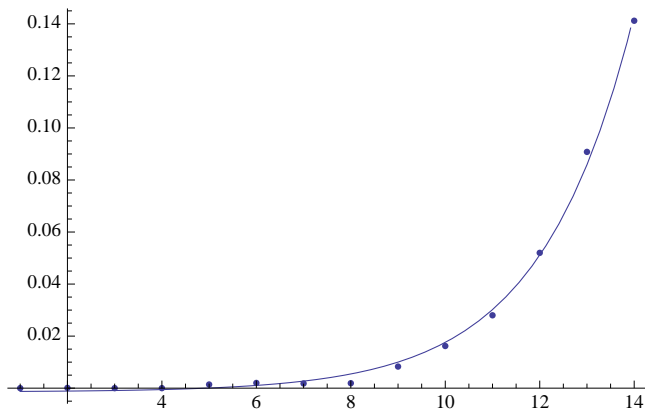

```
X123exp =  
NonlinearModelFit[X123data[[2 ;; 14]], b + d0 * a^x, {b, d0, a}, x, MaxIterations -> 1000]
```

```
FittedModel[  
-0.00159448 + 0.000156214 <<18>>^x  
]
```

```
X123exp["BestFit"]
```

```
-0.00159448 + 0.000156214 1.6133^x
```

```
Show[ListPlot[X123data[[1 ;; 14]], PlotRange -> All], Plot[X123exp[x], {x, 1, 15}]]
```

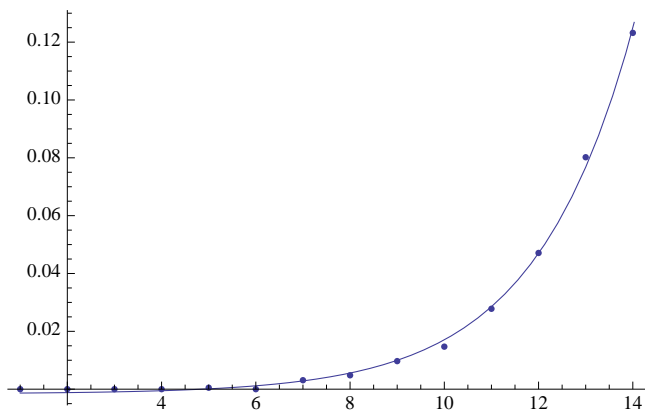

```
X124exp =
NonlinearModelFit[X124data[[2 ;; 14]], b + d0 * a^x, {b, d0, a}, x, MaxIterations -> 1000]
```

```
FittedModel[[-0.00133576 + 0.000125712 <<19>>^x]]
```

```
X124exp["BestFit"]
```

```
-0.00133576 + 0.000125712 1.63696^x
```

```
Show[ListPlot[X124data[[1 ;; 14]], PlotRange -> All], Plot[X124exp[x], {x, 1, 15}]]
```

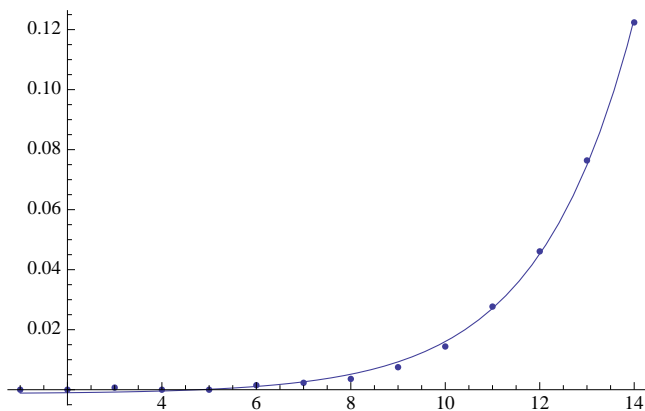

```
X131exp =
NonlinearModelFit[X131data[[2 ;; 14]], b + d0 * a^x, {b, d0, a}, x, MaxIterations -> 1000]
```

```
FittedModel[[-0.00100539 + 0.000137609 <<18>>^x]]
```

```
X131exp["BestFit"]
```

```
-0.00100539 + 0.000137609 1.61801^x
```

```
Show[ListPlot[X131data[[1 ;; 14]], PlotRange -> All], Plot[X131exp[x], {x, 1, 15}]]
```

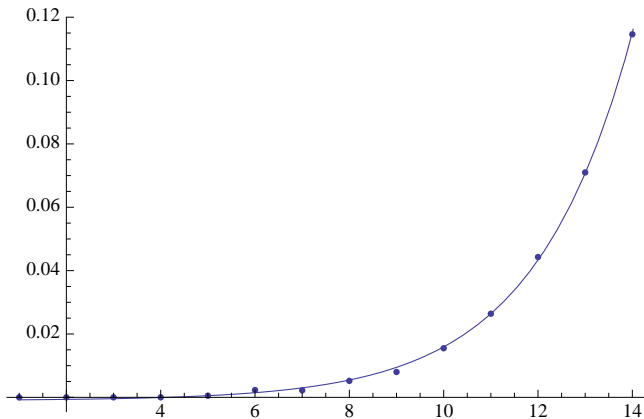

```
X132exp =  
NonlinearModelFit[X132data[[2 ;; 14]], b + d0 * a^x, {b, d0, a}, x, MaxIterations -> 1000]
```

```
FittedModel[  
-0.00155154 + 0.000164489 <<18>>^x  
]
```

```
X132exp["BestFit"]
```

```
-0.00155154 + 0.000164489 1.63397^x
```

```
Show[ListPlot[X132data[[1 ;; 14]], PlotRange -> All], Plot[X132exp[x], {x, 1, 15}]]
```

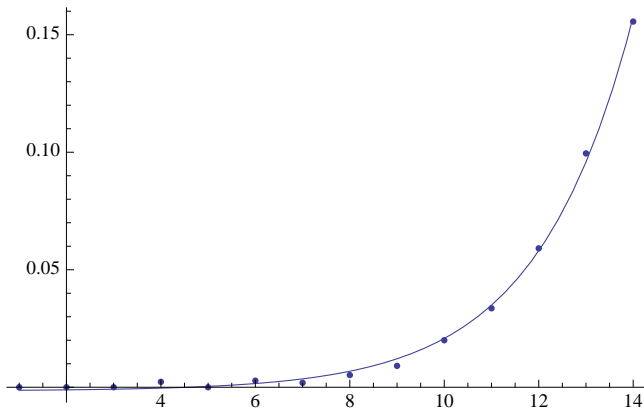

```
X133exp =  
NonlinearModelFit[X133data[[2 ;; 14]], b + d0 * a^x, {b, d0, a}, x, MaxIterations -> 1000]
```

```
FittedModel[  
-0.00176055 + 0.000176786 <<19>>^x  
]
```

```
X133exp["BestFit"]
```

```
-0.00176055 + 0.000176786 1.61879^x
```

```
Show[ListPlot[X133data[[1 ;; 14]], PlotRange -> All], Plot[X133exp[x], {x, 1, 15}]]
```

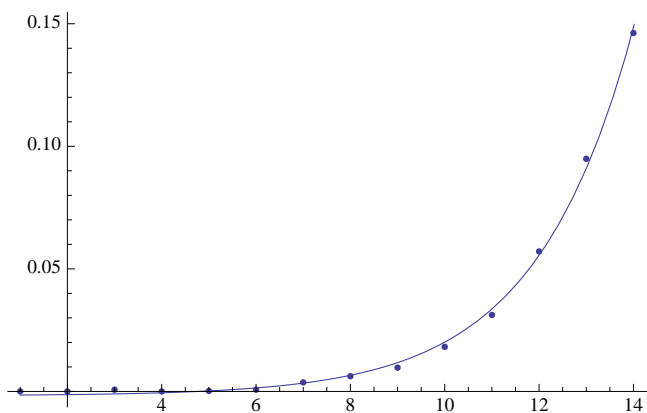

```
X134exp =  
NonlinearModelFit[X134data[[2 ;; 14]], b + d0 * a^x, {b, d0, a}, x, MaxIterations -> 1000]
```

```
FittedModel[[-0.00103387 + 0.000145468 <<19>>^x]]
```

```
X134exp["BestFit"]
```

$$-0.00103387 + 0.000145468 1.62944^x$$

```
Show[ListPlot[X134data[[1 ;; 14]], PlotRange -> All], Plot[X134exp[x], {x, 1, 15}]]
```

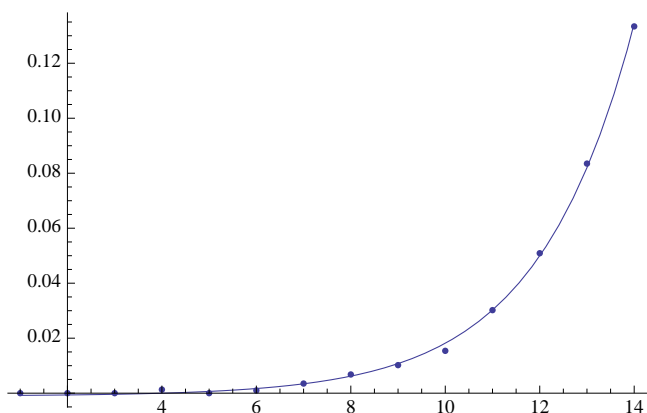

```
X141exp =  
NonlinearModelFit[X141data[[2 ;; 14]], b + d0 * a^x, {b, d0, a}, x, MaxIterations -> 1000]
```

```
FittedModel[[-0.00144893 + 0.000119027 <<19>>^x]]
```

```
X141exp["BestFit"]
```

$$-0.00144893 + 0.000119027 1.63747^x$$

```
Show[ListPlot[X141data[[1 ;; 14]], PlotRange -> All], Plot[X141exp[x], {x, 1, 15}]]
```

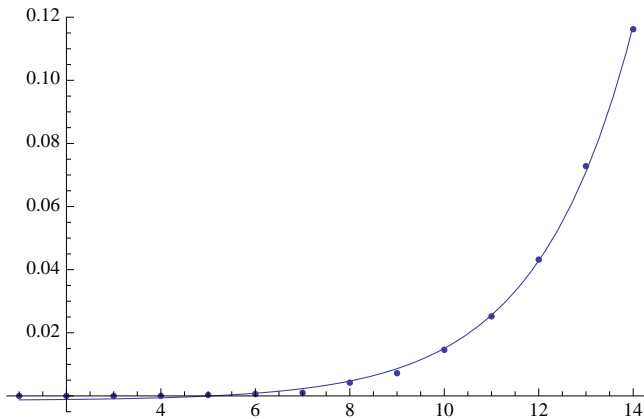

```
X142exp =  
NonlinearModelFit[X142data[[2 ;; 14]], b + d0 * a^x, {b, d0, a}, x, MaxIterations -> 1000]
```

```
FittedModel[[-0.00170321 + 0.000156386 <<19>>^x]]
```

```
X142exp["BestFit"]
```

```
-0.00170321 + 0.000156386 1.62582^x
```

```
Show[ListPlot[X142data[[1 ;; 14]], PlotRange -> All], Plot[X142exp[x], {x, 1, 15}]]
```

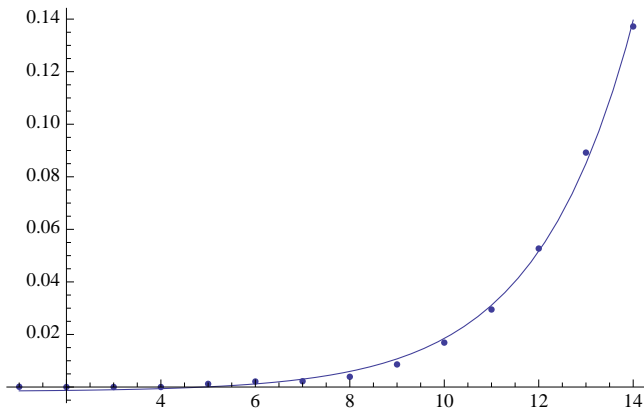

```
X143exp =  
NonlinearModelFit[X143data[[2 ;; 14]], b + d0 * a^x, {b, d0, a}, x, MaxIterations -> 1000]
```

```
FittedModel[[-0.00201219 + 0.000157495 <<19>>^x]]
```

```
X143exp["BestFit"]
```

```
-0.00201219 + 0.000157495 1.61995^x
```



```
Show[ListPlot[X143data[[1 ;; 14]], PlotRange -> All], Plot[X143exp[x], {x, 1, 15}]]
```

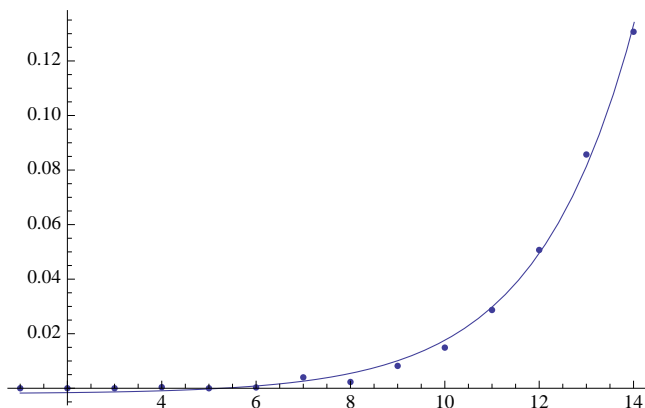

```
X144exp =
NonlinearModelFit[X144data[[2 ;; 14]], b + d0 * a^x, {b, d0, a}, x, MaxIterations -> 1000]
```

```
FittedModel[
$$-0.00162929 + 0.000189251 \ll 19 \gg^x$$
]
```

```
X144exp["BestFit"]
```

```
-0.00162929 + 0.000189251 1.60171^x
```

```
Show[ListPlot[X144data[[1 ;; 14]], PlotRange -> All], Plot[X144exp[x], {x, 1, 15}]]
```

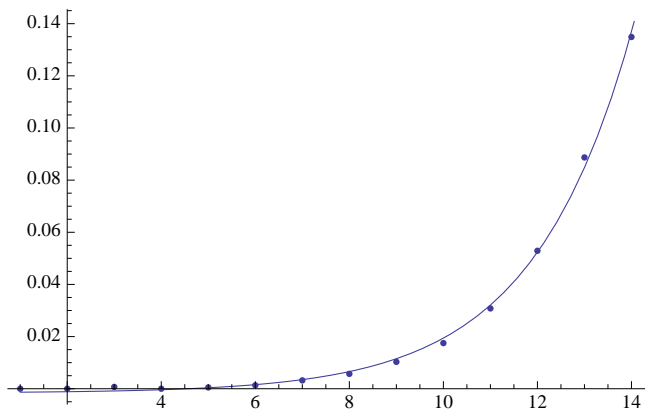

```
X151exp =
NonlinearModelFit[X151data[[2 ;; 14]], b + d0 * a^x, {b, d0, a}, x, MaxIterations -> 1000]
```

```
FittedModel[
$$-0.00233291 + 0.000168334 \ll 19 \gg^x$$
]
```

```
X151exp["BestFit"]
```

```
-0.00233291 + 0.000168334 1.62716^x
```

```
Show[ListPlot[X151data[[1 ;; 14]], PlotRange -> All], Plot[X151exp[x], {x, 1, 15}]]
```

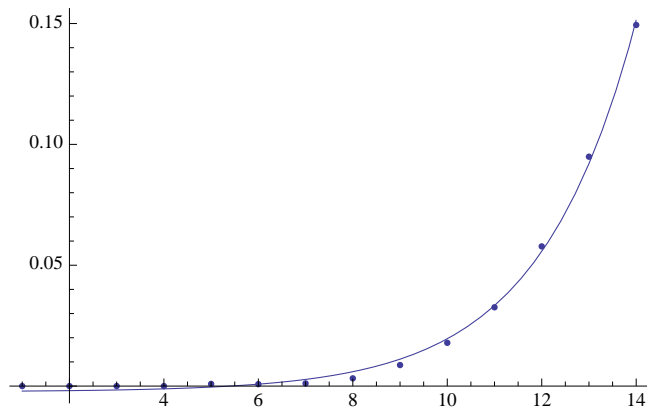

```
X152exp =
NonlinearModelFit[X152data[[2 ;; 14]], b + d0 * a^x, {b, d0, a}, x, MaxIterations -> 1000]
```

```
FittedModel[[-0.0021698 + 0.000170541 <<19>>^x]]
```

```
X152exp["BestFit"]
```

```
-0.0021698 + 0.000170541 1.6316^x
```

```
Show[ListPlot[X152data[[1 ;; 14]], PlotRange -> All], Plot[X152exp[x], {x, 1, 15}]]
```

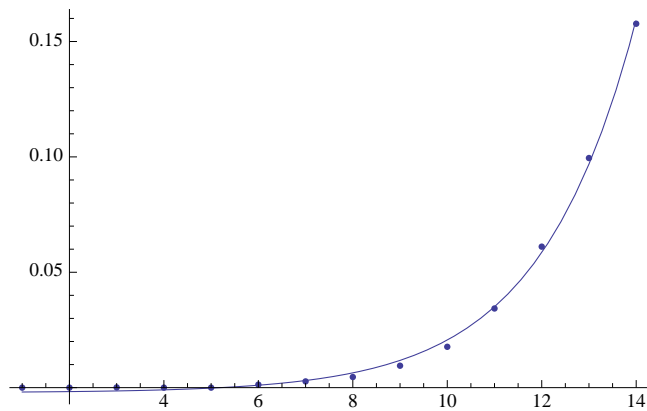

```
X153exp =
NonlinearModelFit[X153data[[2 ;; 14]], b + d0 * a^x, {b, d0, a}, x, MaxIterations -> 1000]
```

```
FittedModel[[-0.00209415 + 0.000197078 <<19>>^x]]
```

```
X153exp["BestFit"]
```

```
-0.00209415 + 0.000197078 1.61031^x
```

```
Show[ListPlot[X153data[[1 ;; 14]], PlotRange -> All], Plot[X153exp[x], {x, 1, 15}]]
```

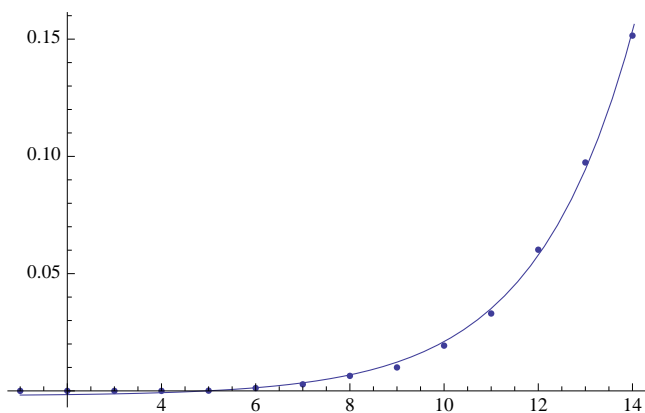

```
X154exp = NonlinearModelFit[X154data[[2 ;; 14]], b + d0 * a^x, {b, d0, a}, x, MaxIterations -> 1000]
```

```
FittedModel[[-0.00176367 + 0.000138434 <<19>>^x]]
```

```
X154exp["BestFit"]
```

$$-0.00176367 + 0.000138434 1.64197^x$$

```
Show[ListPlot[X154data[[1 ;; 14]], PlotRange -> All], Plot[X154exp[x], {x, 1, 15}]]
```

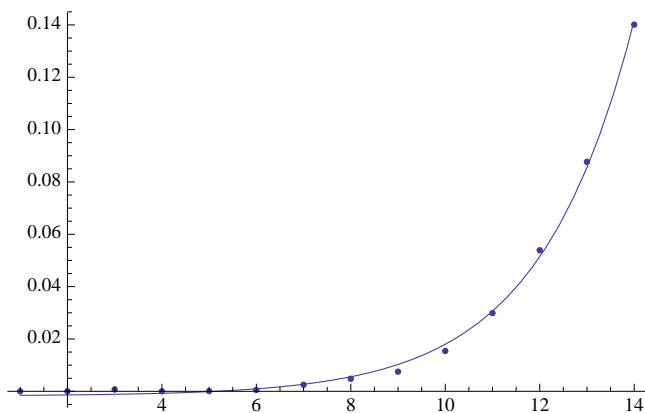

```
X211exp = NonlinearModelFit[X211data[[1 ;; 15]], b + d0 * a^x, {b, d0, a}, x, MaxIterations -> 1000]
```

```
FittedModel[ [ 0.000110522 + 6.11733 × 10-6 <<19>>^x ] ]
```

```
X211exp["BestFit"]
```

$$0.000110522 + 6.11733 \times 10^{-6} 1.8182^x$$

```
Show[ListPlot[X211data[[1 ;; 20]], PlotRange -> All], Plot[X211exp[x], {x, 1, 20}]]
```

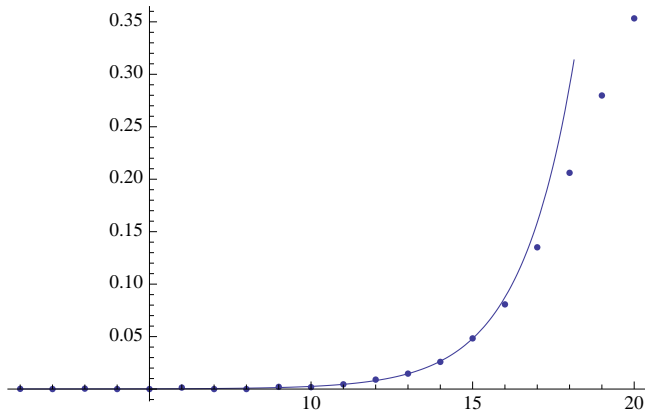

```
X212exp =
NonlinearModelFit[X212data[[1 ;; 15]], b + d0 * a^x, {b, d0, a}, x, MaxIterations -> 1000]
```

```
FittedModel[0.000063897 + 2.87221 × 10-6 <<19>>x]
```

```
X212exp["BestFit"]
```

```
0.000063897 + 2.87221 × 10-6 1.90837x
```

```
Show[ListPlot[X212data[[1 ;; 15]], PlotRange -> All], Plot[X212exp[x], {x, 1, 16}]]
```

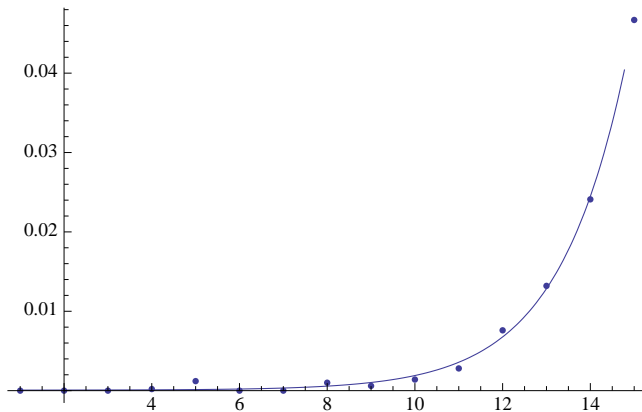

```
X213exp =
NonlinearModelFit[X213data[[2 ;; 15]], b + d0 * a^x, {b, d0, a}, x, MaxIterations -> 1000]
```

```
FittedModel[2.46294 × 10-6 + 8.81896 × 10-7 <<18>>x]
```

```
X213exp["BestFit"]
```

```
2.46294 × 10-6 + 8.81896 × 10-7 2.02643x
```

```
Show[ListPlot[X213data[[1 ;; 15]], PlotRange -> All], Plot[X213exp[x], {x, 1, 17}]]
```

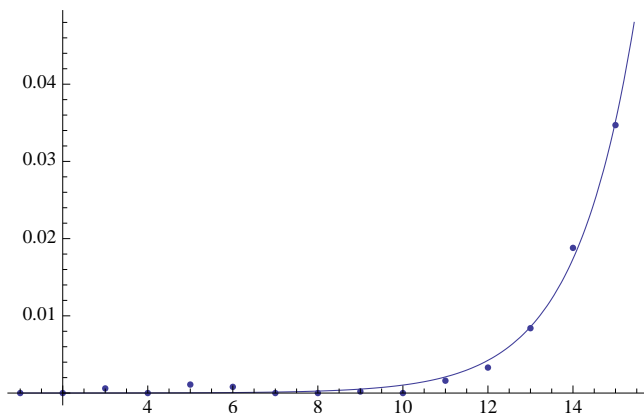

```
X214exp =
NonlinearModelFit[X214data[[2 ;; 15]], b + d0 * a^x, {b, d0, a}, x, MaxIterations -> 1000]
```

```
FittedModel[ 0.000103384 + 3.18872 × 10-6 <<19>>x ]
```

```
X214exp["BestFit"]
```

```
0.000103384 + 3.18872 × 10-6 1.86465x
```

```
Show[ListPlot[X214data[[1 ;; 20]], PlotRange -> All], Plot[X214exp[x], {x, 1, 22}]]
```

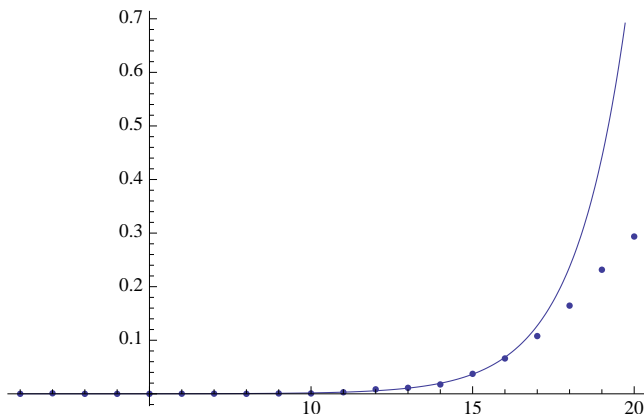

```
X221exp =
NonlinearModelFit[X221data[[1 ;; 15]], b + d0 * a^x, {b, d0, a}, x, MaxIterations -> 1000]
```

```
FittedModel[ 0.0000345803 + 0.0000176973 <<19>>x ]
```

```
X221exp["BestFit"]
```

```
0.0000345803 + 0.0000176973 1.66956x
```

```
Show[ListPlot[X221data[[1 ;; 20]], PlotRange -> All], Plot[X221exp[x], {x, 1, 20}]]
```

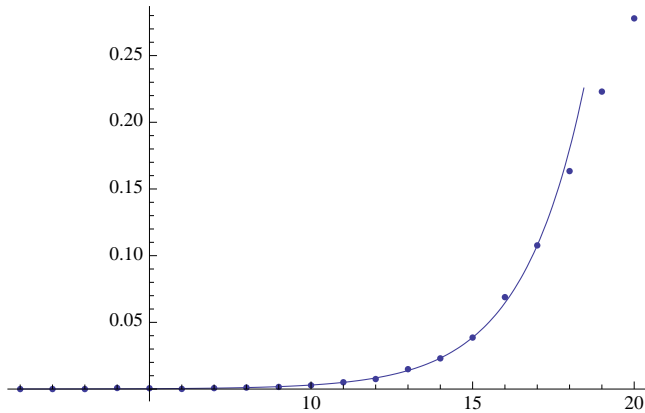

```
X222exp =
NonlinearModelFit[X222data[[1 ;; 15]], b + d0 * a^x, {b, d0, a}, x, MaxIterations -> 1000]
```

```
FittedModel[0.000543117 + 8.4109 × 10-6 <<19>>x]
```

```
X222exp["BestFit"]
```

```
0.000543117 + 8.4109 × 10-6 1.74762x
```

```
Show[ListPlot[X222data[[1 ;; 15]], PlotRange -> All], Plot[X222exp[x], {x, 1, 16}]]
```

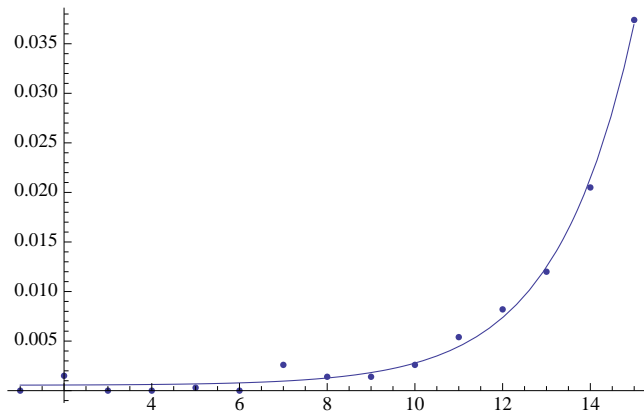

```
X223exp =
NonlinearModelFit[X223data[[2 ;; 15]], b + d0 * a^x, {b, d0, a}, x, MaxIterations -> 1000]
```

```
FittedModel[-0.000158784 + 6.77524 × 10-6 <<19>>x]
```

```
X223exp["BestFit"]
```

```
-0.000158784 + 6.77524 × 10-6 1.77526x
```

```
Show[ListPlot[X223data[[1 ;; 15]], PlotRange -> All], Plot[X223exp[x], {x, 1, 17}]]
```

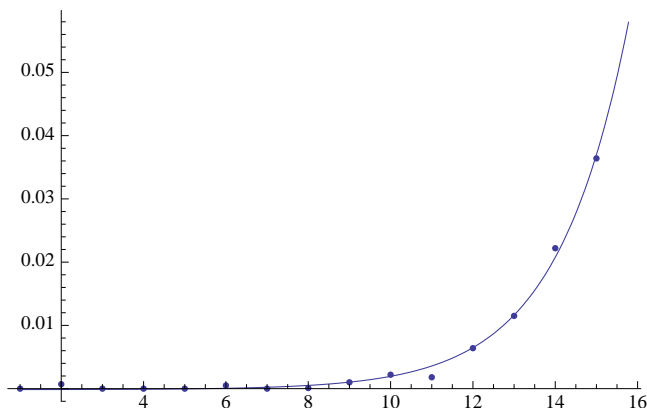

```
X224exp =
  NonlinearModelFit[X224data[[2 ;; 15]], b + d0 * a^x, {b, d0, a}, x, MaxIterations -> 1000]
```

```
FittedModel [ 0.000588167 + 5.36974 × 10-6 <<19>>x ]
```

```
X224exp["BestFit"]
```

$$0.000588167 + 5.36974 \times 10^{-6} 1.80439^x$$

```
Show[ListPlot[X224data[[1 ;; 20]], PlotRange -> All], Plot[X224exp[x], {x, 1, 22}]]
```

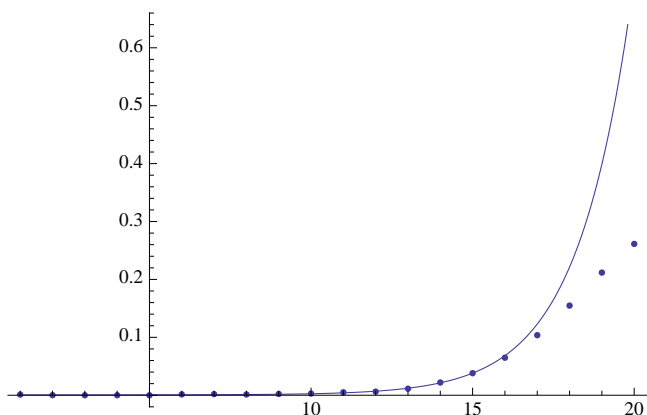

```
X231exp =
  NonlinearModelFit[X231data[[1 ;; 15]], b + d0 * a^x, {b, d0, a}, x, MaxIterations -> 1000]
```

```
FittedModel [ -0.0000314852 + 9.43912 × 10-6 <<19>>x ]
```

```
X231exp["BestFit"]
```

$$-0.0000314852 + 9.43912 \times 10^{-6} 1.74424^x$$

```
Show[ListPlot[X231data[[1 ;; 20]], PlotRange -> All], Plot[X231exp[x], {x, 1, 20}]]
```

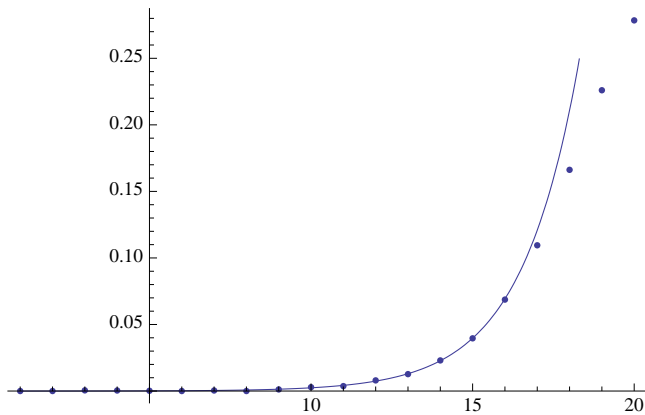

```
X232exp =
NonlinearModelFit[X232data[[1 ;; 15]], b + d0 * a^x, {b, d0, a}, x, MaxIterations -> 1000]
```

```
FittedModel[0.000101681 + 6.19129 × 10-6 <<19>>x]
```

```
X232exp["BestFit"]
```

```
0.000101681 + 6.19129 × 10-6 1.78595x
```

```
Show[ListPlot[X232data[[1 ;; 15]], PlotRange -> All], Plot[X232exp[x], {x, 1, 16}]]
```

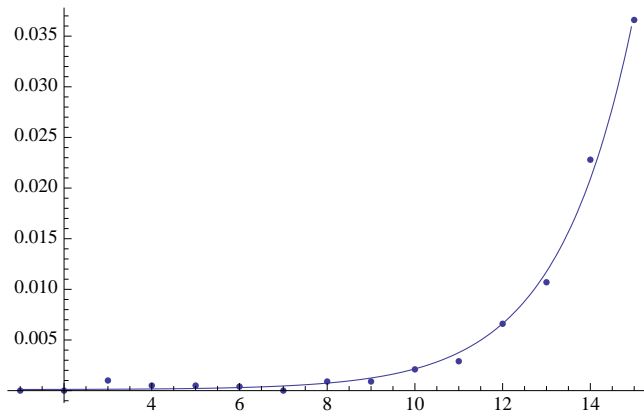

```
X233exp =
NonlinearModelFit[X233data[[2 ;; 15]], b + d0 * a^x, {b, d0, a}, x, MaxIterations -> 1000]
```

```
FittedModel[0.000396906 + 0.0000190444 <<19>>x]
```

```
X233exp["BestFit"]
```

```
0.000396906 + 0.0000190444 1.65027x
```



```
Show[ListPlot[X233data[[1 ;; 15]], PlotRange -> All], Plot[X233exp[x], {x, 1, 17}]]
```

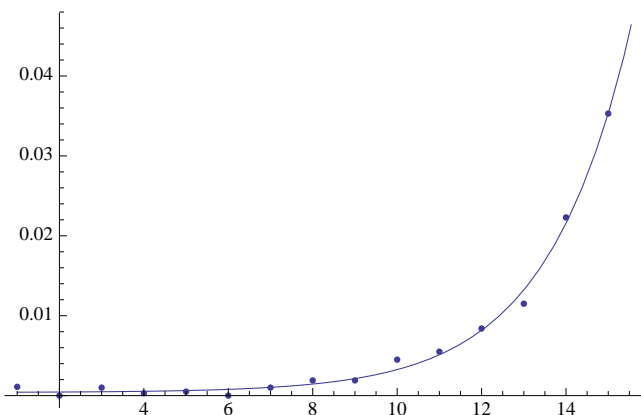

```
X234exp =
NonlinearModelFit[X234data[[2 ;; 15]], b + d0 * a^x, {b, d0, a}, x, MaxIterations -> 1000]
```

```
FittedModel[ 0.000286217 + 5.04736 × 10-6 <<19>>x ]
```

```
X234exp["BestFit"]
```

```
0.000286217 + 5.04736 × 10-6 1.80303x
```

```
Show[ListPlot[X234data[[1 ;; 20]], PlotRange -> All], Plot[X234exp[x], {x, 1, 22}]]
```

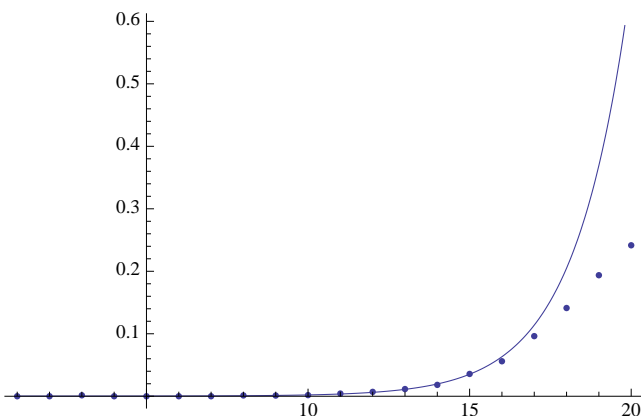

```
X241exp =
NonlinearModelFit[X241data[[1 ;; 15]], b + d0 * a^x, {b, d0, a}, x, MaxIterations -> 1000]
```

```
FittedModel[ 0.0000187071 + 0.0000100793 <<19>>x ]
```

```
X241exp["BestFit"]
```

```
0.0000187071 + 0.0000100793 1.75597x
```

```
Show[ListPlot[X241data[[1 ;; 20]], PlotRange -> All], Plot[X241exp[x], {x, 1, 20}]]
```

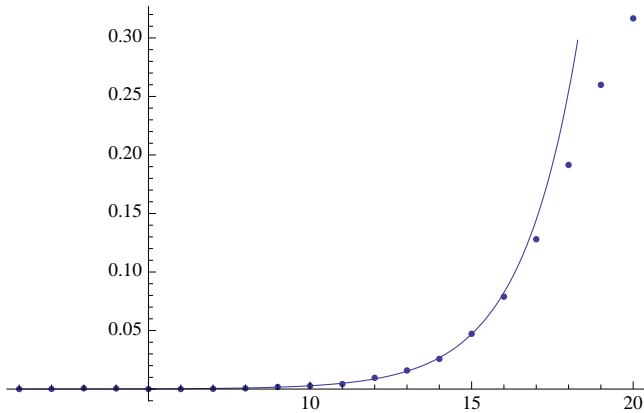

```
X242exp =
NonlinearModelFit[X242data[[1 ;; 15]], b + d0 * a^x, {b, d0, a}, x, MaxIterations -> 1000]
```

```
FittedModel [ 0.000103583 + 5.04605 × 10-6 <<19>>x ]
```

```
X242exp["BestFit"]
```

```
0.000103583 + 5.04605 × 10-6 1.81483x
```

```
Show[ListPlot[X242data[[1 ;; 15]], PlotRange -> All], Plot[X242exp[x], {x, 1, 16}]]
```

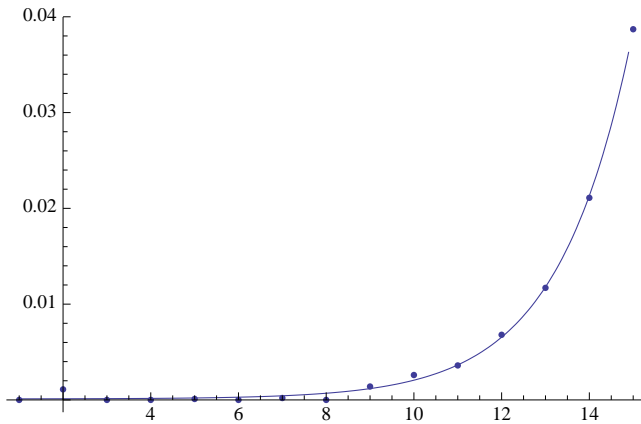

```
X243exp =
NonlinearModelFit[X243data[[2 ;; 15]], b + d0 * a^x, {b, d0, a}, x, MaxIterations -> 1000]
```

```
FittedModel [ -0.0000868314 + 5.18919 × 10-6 <<19>>x ]
```

```
X243exp["BestFit"]
```

```
-0.0000868314 + 5.18919 × 10-6 1.78797x
```

```
Show[ListPlot[X243data[[1 ;; 15]], PlotRange -> All], Plot[X243exp[x], {x, 1, 17}]]
```

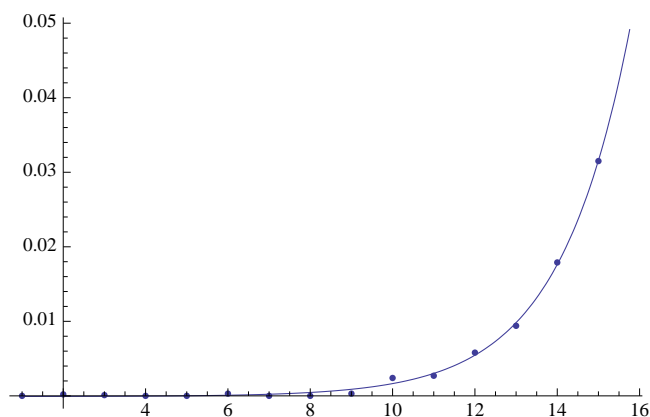

```
X244exp =
NonlinearModelFit[X244data[[2 ;; 15]], b + d0 * a^x, {b, d0, a}, x, MaxIterations -> 1000]
```

```
FittedModel[
$$-6.79183 \times 10^{-6} + 4.03432 \times 10^{-6} \ll 19 \gg^x$$
]
```

```
X244exp["BestFit"]
```

```

$$-6.79183 \times 10^{-6} + 4.03432 \times 10^{-6} 1.81664^x$$

```

```
Show[ListPlot[X244data[[1 ;; 20]], PlotRange -> All], Plot[X244exp[x], {x, 1, 22}]]
```

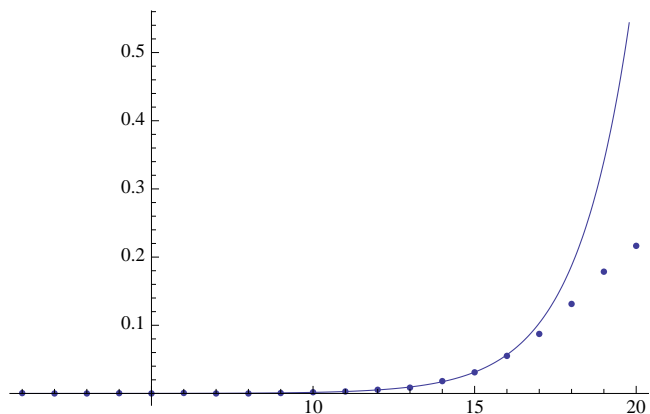

```
X251exp =
NonlinearModelFit[X251data[[1 ;; 15]], b + d0 * a^x, {b, d0, a}, x, MaxIterations -> 1000]
```

```
FittedModel[
$$0.000279727 + 0.0000186937 \ll 19 \gg^x$$
]
```

```
X251exp["BestFit"]
```

```

$$0.000279727 + 0.0000186937 1.66883^x$$

```

```
Show[ListPlot[X251data[[1 ;; 20]], PlotRange -> All], Plot[X251exp[x], {x, 1, 20}]]
```

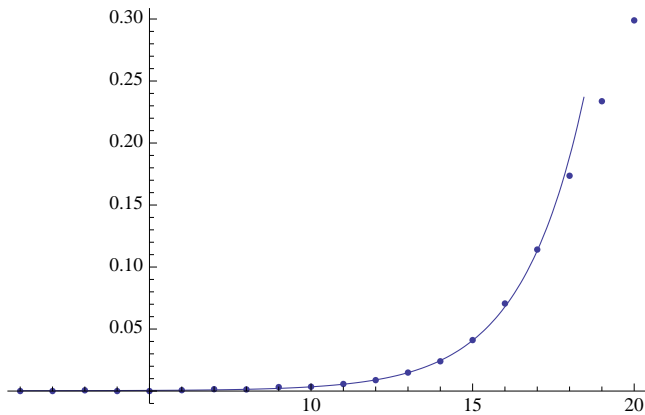

```
X252exp =  
NonlinearModelFit[X252data[[1 ;; 15]], b + d0 * a^x, {b, d0, a}, x, MaxIterations -> 1000]
```

```
FittedModel[  
0.0000186645 + 9.61072 × 10-6 <<19>>x  
]
```

```
X252exp["BestFit"]
```

```
0.0000186645 + 9.61072 × 10-6 1.74947x
```

```
Show[ListPlot[X252data[[1 ;; 15]], PlotRange -> All], Plot[X252exp[x], {x, 1, 16}]]
```

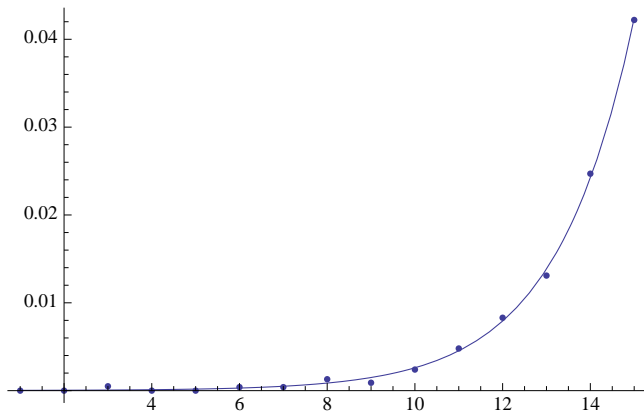

```
X253exp =  
NonlinearModelFit[X253data[[2 ;; 15]], b + d0 * a^x, {b, d0, a}, x, MaxIterations -> 1000]
```

```
FittedModel[  
0.0000711672 + 5.78513 × 10-6 <<19>>x  
]
```

```
X253exp["BestFit"]
```

```
0.0000711672 + 5.78513 × 10-6 1.78574x
```

```
Show[ListPlot[X253data[[1 ;; 15]], PlotRange -> All], Plot[X253exp[x], {x, 1, 17}]]
```

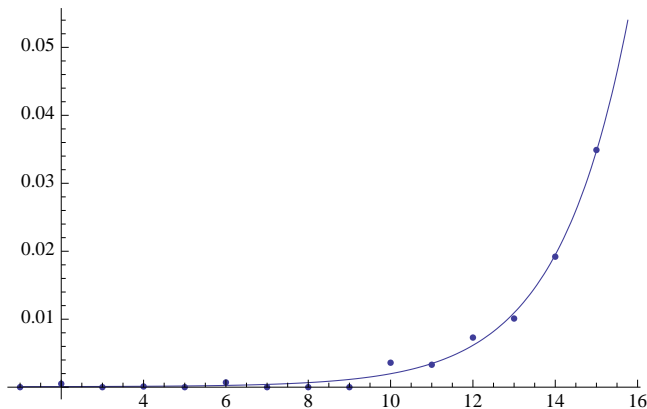

```
X254exp =
  NonlinearModelFit[X254data[[2 ;; 15]], b + d0 * a^x, {b, d0, a}, x, MaxIterations -> 1000]
```

FittedModel [ 0.000550572 + 2.88881 × 10<sup>-6</sup> <<19>><sup>x</sup> ]

```
X254exp["BestFit"]
```

0.000550572 + 2.88881 × 10<sup>-6</sup> 1.87563<sup>x</sup>

```
Show[ListPlot[X254data[[1 ;; 20]], PlotRange -> All], Plot[X254exp[x], {x, 1, 22}]]
```

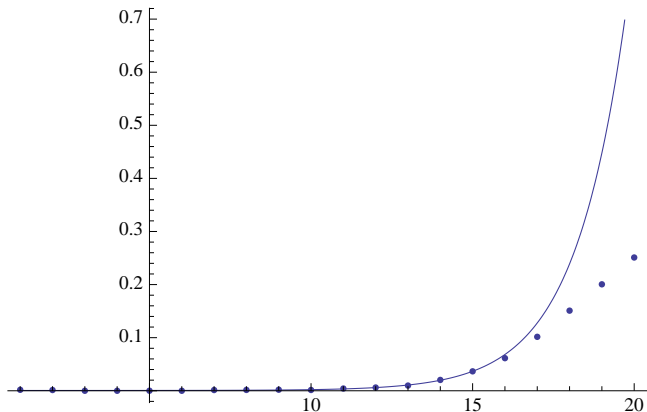

```
X311exp =
  NonlinearModelFit[X311data[[2 ;; 19]], b + d0 * a^x, {b, d0, a}, x, MaxIterations -> 1000]
```

FittedModel [ 0.000297039 + 2.37729 × 10<sup>-7</sup> <<18>><sup>x</sup> ]

```
X311exp["BestFit"]
```

0.000297039 + 2.37729 × 10<sup>-7</sup> 1.88632<sup>x</sup>

```
Show[ListPlot[X311data[[1 ;; 19]], PlotRange -> All], Plot[X311exp[x], {x, 1, 21}]]
```

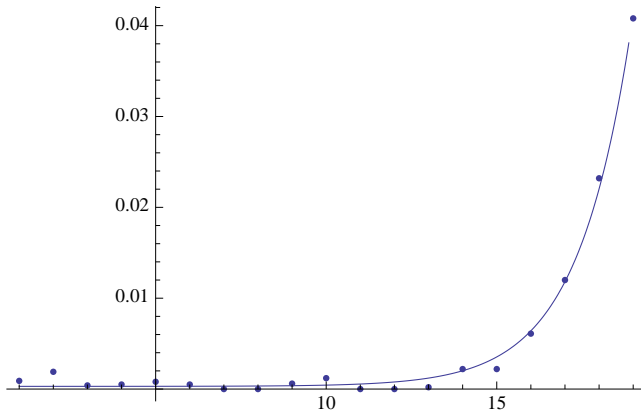

```
X312exp =
NonlinearModelFit[X312data[[2 ;; 19]], b + d0 * a^x, {b, d0, a}, x, MaxIterations -> 1000]
```

```
FittedModel [ 0.000161324 + 7.06402 × 10-7 <<19>>x ]
```

```
X312exp["BestFit"]
```

```
0.000161324 + 7.06402 × 10-7 1.78783x
```

```
Show[ListPlot[X312data[[1 ;; 19]], PlotRange -> All], Plot[X312exp[x], {x, 1, 21}]]
```

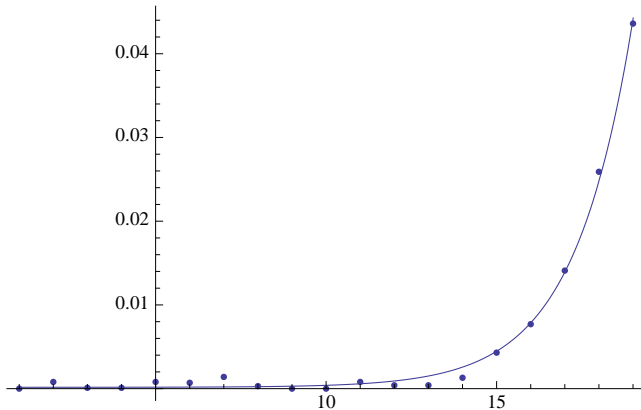

```
X313exp =
NonlinearModelFit[X313data[[2 ;; 19]], b + d0 * a^x, {b, d0, a}, x, MaxIterations -> 1000]
```

```
FittedModel [ -0.000109957 + 1.40857 × 10-6 <<19>>x ]
```

```
X313exp["BestFit"]
```

```
-0.000109957 + 1.40857 × 10-6 1.70873x
```

```
Show[ListPlot[X313data[[1 ;; 19]], PlotRange -> All], Plot[X313exp[x], {x, 1, 21}]]
```

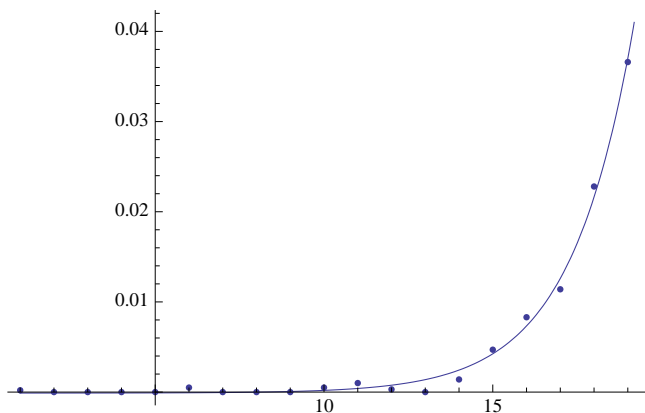

```
X314exp = NonlinearModelFit[X314data[[2 ;; 19]], b + d0 * a^x, {b, d0, a}, x, MaxIterations -> 1000]
```

```
FittedModel[0.000290109 + 7.68663 × 10-7 <<19>>x]
```

```
X314exp["BestFit"]
```

$$0.000290109 + 7.68663 \times 10^{-7} 1.76487^x$$

```
Show[ListPlot[X314data[[1 ;; 19]], PlotRange -> All], Plot[X314exp[x], {x, 1, 21}]]
```

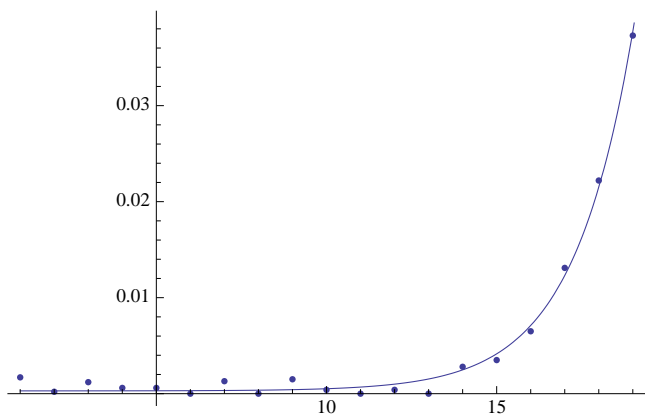

```
X321exp = NonlinearModelFit[X321data[[2 ;; 19]], b + d0 * a^x, {b, d0, a}, x, MaxIterations -> 1000]
```

```
FittedModel[-0.000171617 + 5.09911 × 10-7 <<19>>x]
```

```
X321exp["BestFit"]
```

$$-0.000171617 + 5.09911 \times 10^{-7} 1.80669^x$$

```
Show[ListPlot[X321data[[1 ;; 20]], PlotRange -> All], Plot[X321exp[x], {x, 1, 20}]]
```

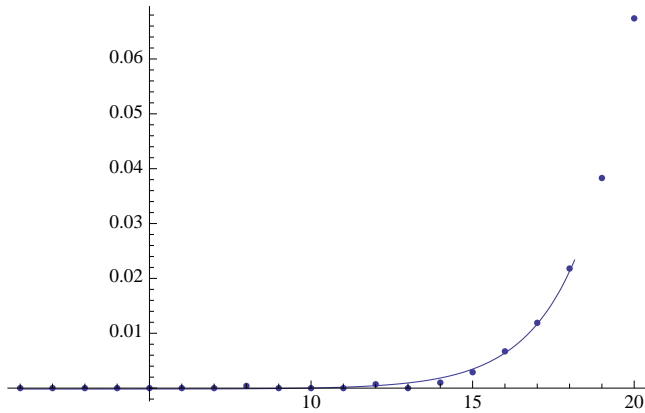

```
X322exp =
  NonlinearModelFit[X322data[[2 ;; 19]], b + d0 * a^x, {b, d0, a}, x, MaxIterations -> 1000]
```

```
FittedModel[
$$-0.000117151 + 5.72873 \times 10^{-7} \ll 18 \gg^x$$
]
```

```
X322exp["BestFit"]
```

```

$$-0.000117151 + 5.72873 \times 10^{-7} 1.80331^x$$

```

```
Show[ListPlot[X322data[[1 ;; 19]], PlotRange -> All], Plot[X322exp[x], {x, 1, 22}]]
```

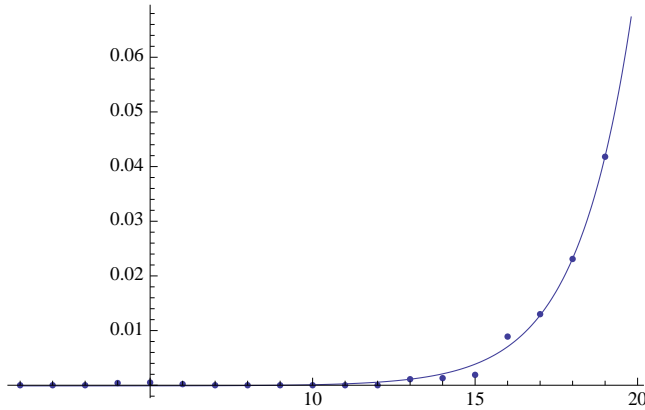

```
X323exp =
  NonlinearModelFit[X323data[[2 ;; 19]], b + d0 * a^x, {b, d0, a}, x, MaxIterations -> 1000]
```

```
FittedModel[
$$-0.0000529368 + 8.26306 \times 10^{-7} \ll 18 \gg^x$$
]
```

```
X323exp["BestFit"]
```

```

$$-0.0000529368 + 8.26306 \times 10^{-7} 1.78125^x$$

```



```
Show[ListPlot[X323data[[1 ;; 19]], PlotRange -> All], Plot[X323exp[x], {x, 1, 21}]]
```

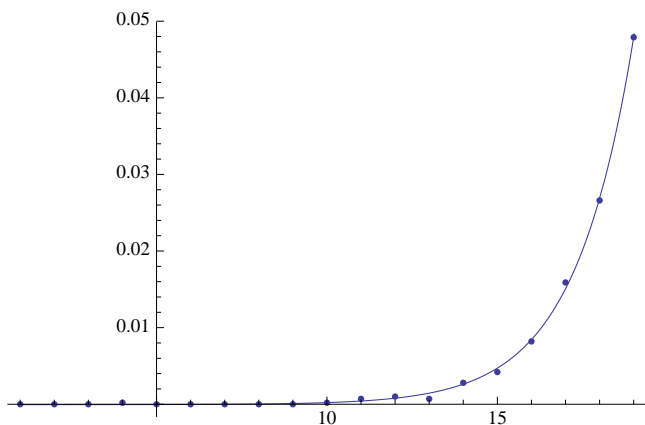

```
X324exp = NonlinearModelFit[X324data[[2 ;; 19]], b + d0 * a^x, {b, d0, a}, x, MaxIterations -> 1000]
```

```
FittedModel[[-0.000136721 + 6.20397 × 10-7 <<19>>x]]
```

```
X324exp["BestFit"]
```

$$-0.000136721 + 6.20397 \times 10^{-7} 1.81211^x$$

```
Show[ListPlot[X324data[[1 ;; 20]], PlotRange -> All], Plot[X324exp[x], {x, 1, 22}]]
```

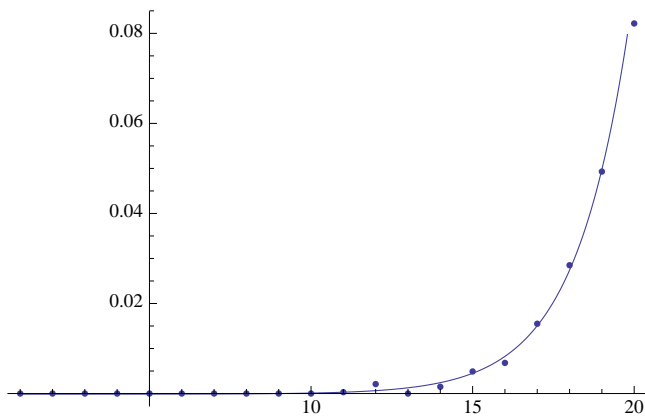

```
X331exp = NonlinearModelFit[X331data[[2 ;; 19]], b + d0 * a^x, {b, d0, a}, x, MaxIterations -> 1000]
```

```
FittedModel[[-0.0000362272 + 4.23537 × 10-7 <<18>>x]]
```

```
X331exp["BestFit"]
```

$$-0.0000362272 + 4.23537 \times 10^{-7} 1.84691^x$$

```
Show[ListPlot[X331data[[1 ;; 20]], PlotRange -> All], Plot[X331exp[x], {x, 1, 23}]]
```

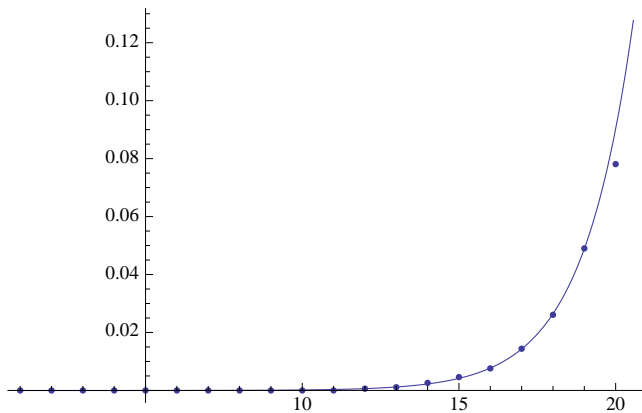

```
X332exp =
NonlinearModelFit[X332data[[10 ;; 19]], b + d0 * a^x, {b, d0, a}, x, MaxIterations -> 1000]
```

```
FittedModel [ -0.000677626 + 6.47734 × 10-7 <<19>>x ]
```

```
X332exp["BestFit"]
```

```
-0.000677626 + 6.47734 × 10-7 1.82007x
```

```
Show[ListPlot[X332data[[1 ;; 19]], PlotRange -> All], Plot[X332exp[x], {x, 1, 22}]]
```

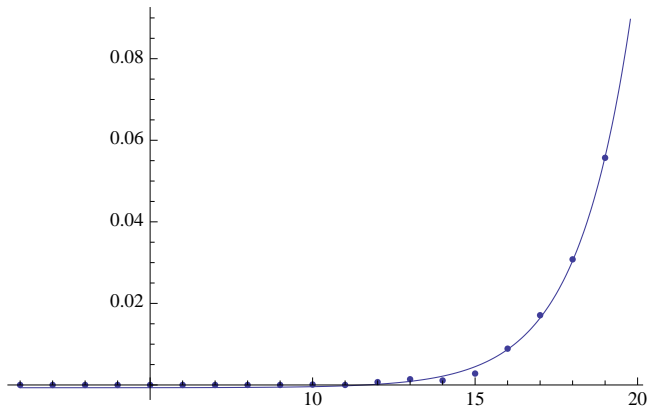

```
X333exp =
NonlinearModelFit[X333data[[2 ;; 19]], b + d0 * a^x, {b, d0, a}, x, MaxIterations -> 1000]
```

```
FittedModel [ -0.00014129 + 6.76233 × 10-7 <<19>>x ]
```

```
X333exp["BestFit"]
```

```
-0.00014129 + 6.76233 × 10-7 1.80744x
```

```
Show[ListPlot[X333data[[1 ;; 19]], PlotRange -> All], Plot[X333exp[x], {x, 1, 22}]]
```

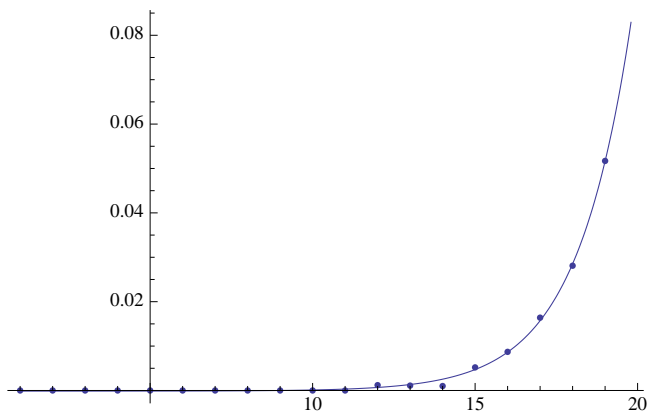

```
X334exp = NonlinearModelFit[X334data[[10 ;; 19]], b + d0 * a^x, {b, d0, a}, x, MaxIterations -> 1000]
```

```
FittedModel[[-0.000581152 + 1.2912 × 10-6 <<19>>x]]
```

```
X334exp["BestFit"]
```

$$-0.000581152 + 1.2912 \times 10^{-6} 1.754^x$$

```
Show[ListPlot[X334data[[1 ;; 20]], PlotRange -> All], Plot[X334exp[x], {x, 1, 22}]]
```

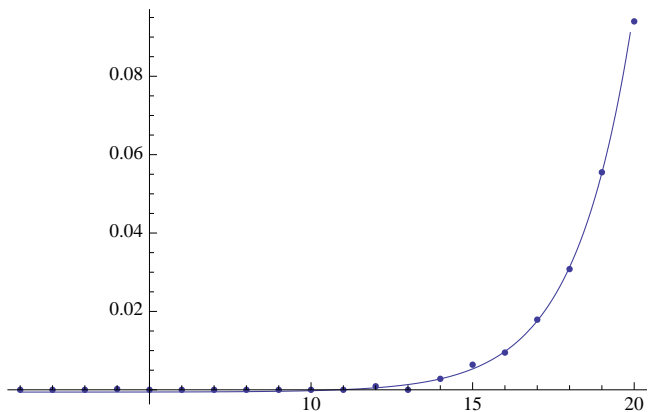

```
X341exp = NonlinearModelFit[X341data[[2 ;; 19]], b + d0 * a^x, {b, d0, a}, x, MaxIterations -> 1000]
```

```
FittedModel[[0.000197982 + 5.11667 × 10-7 <<19>>x]]
```

```
X341exp["BestFit"]
```

$$0.000197982 + 5.11667 \times 10^{-7} 1.80593^x$$

```
Show[ListPlot[X341data[[1 ;; 20]], PlotRange -> All], Plot[X341exp[x], {x, 1, 22}]]
```

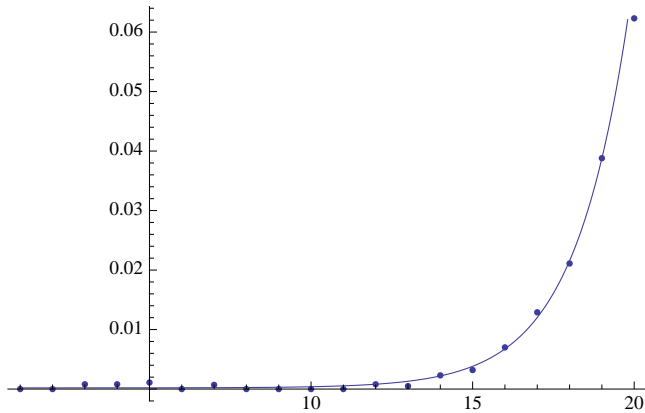

```
X342exp =
NonlinearModelFit[X342data[[2 ;; 19]], b + d0 * a^x, {b, d0, a}, x, MaxIterations -> 1000]
```

```
FittedModel [ -0.000130338 + 8.42584 × 10-7 <<19>>x ]
```

```
X342exp["BestFit"]
```

```
-0.000130338 + 8.42584 × 10-7 1.77362x
```

```
Show[ListPlot[X342data[[1 ;; 20]], PlotRange -> All], Plot[X342exp[x], {x, 1, 22}]]
```

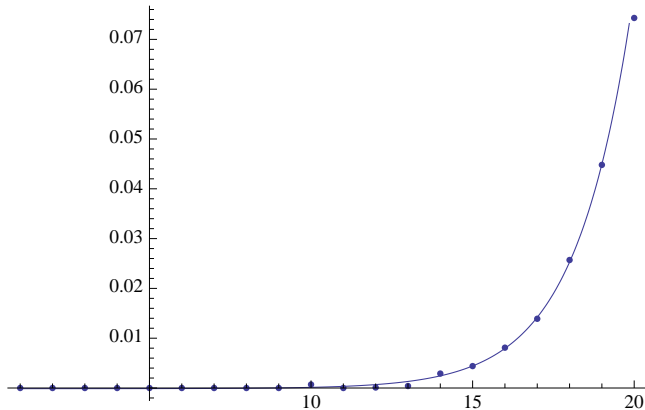

```
X343exp =
NonlinearModelFit[X343data[[2 ;; 19]], b + d0 * a^x, {b, d0, a}, x, MaxIterations -> 1000]
```

```
FittedModel [ -0.000264434 + 1.40858 × 10-6 <<19>>x ]
```

```
X343exp["BestFit"]
```

```
-0.000264434 + 1.40858 × 10-6 1.71202x
```

```
Show[ListPlot[X343data[[1 ;; 20]], PlotRange -> All], Plot[X343exp[x], {x, 1, 22}]]
```

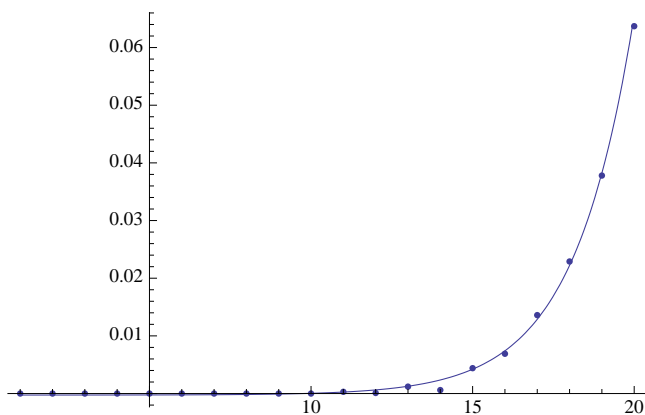

```
X344exp =
  NonlinearModelFit[X344data[[2 ;; 19]], b + d0 * a^x, {b, d0, a}, x, MaxIterations -> 1000]
```

```
FittedModel [ -0.000290228 + 2.38968 × 10-6 <<18>>x ]
```

```
X344exp["BestFit"]
```

```
-0.000290228 + 2.38968 × 10-6 1.66801x
```

```
Show[ListPlot[X344data[[1 ;; 20]], PlotRange -> All], Plot[X344exp[x], {x, 1, 22}]]
```

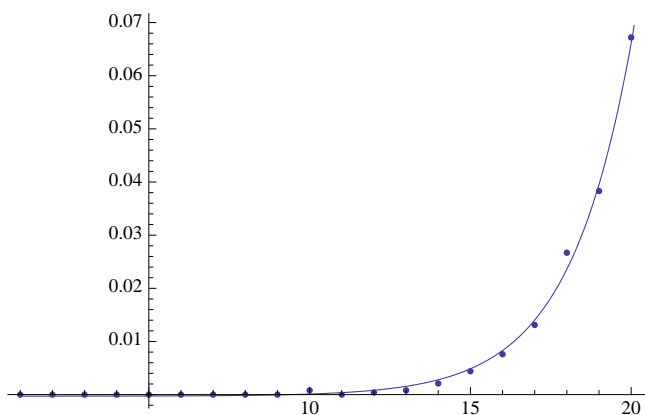

```
X351exp =
  NonlinearModelFit[X351data[[2 ;; 19]], b + d0 * a^x, {b, d0, a}, x, MaxIterations -> 1000]
```

```
FittedModel [ -0.000056511 + 9.06115 × 10-7 <<19>>x ]
```

```
X351exp["BestFit"]
```

```
-0.000056511 + 9.06115 × 10-7 1.7564x
```

```
Show[ListPlot[X351data[[1 ;; 20]], PlotRange -> All], Plot[X351exp[x], {x, 1, 22}]]
```

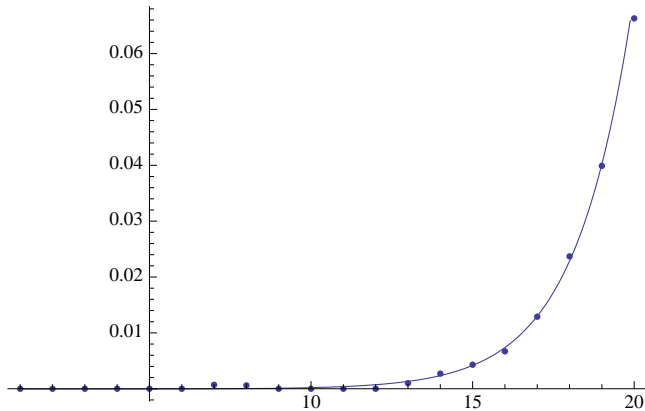

```
X352exp =
NonlinearModelFit[X352data[[2 ;; 19]], b + d0 * a^x, {b, d0, a}, x, MaxIterations -> 1000]
```

```
FittedModel[-0.0000753951 + 4.33935 × 10-7 <<19>>x]
```

```
X352exp["BestFit"]
```

```
-0.0000753951 + 4.33935 × 10-7 1.84402x
```

```
Show[ListPlot[X352data[[1 ;; 20]], PlotRange -> All], Plot[X352exp[x], {x, 1, 22}]]
```

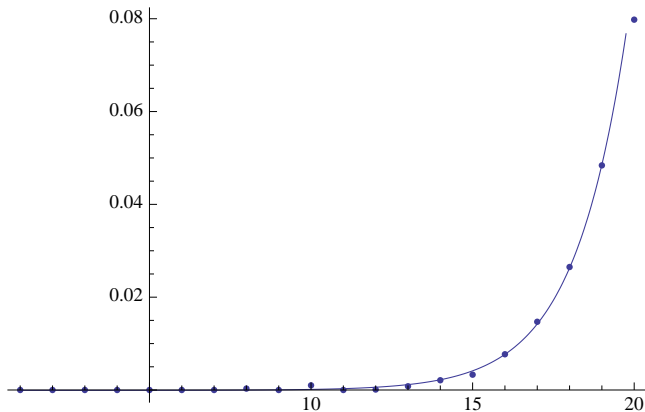

```
X353exp =
NonlinearModelFit[X353data[[2 ;; 19]], b + d0 * a^x, {b, d0, a}, x, MaxIterations -> 1000]
```

```
FittedModel[0.0000138645 + 5.21369 × 10-7 <<18>>x]
```

```
X353exp["BestFit"]
```

```
0.0000138645 + 5.21369 × 10-7 1.82324x
```

```
Show[ListPlot[X353data[[1 ;; 20]], PlotRange -> All], Plot[X353exp[x], {x, 1, 22}]]
```

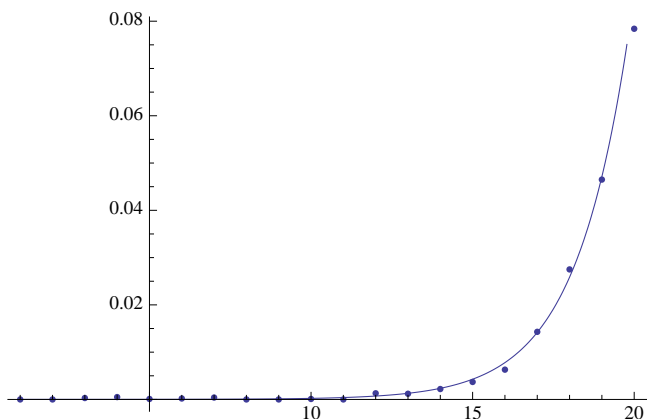

```
X354exp = NonlinearModelFit[X354data[[5 ;; 20]], b + d0 * a^x, {b, d0, a}, x, MaxIterations -> 1000]
```

```
FittedModel[[-0.00024931 + 1.32729 × 10-6 <<19>>x]]
```

```
X354exp["BestFit"]
```

$$-0.00024931 + 1.32729 \times 10^{-6} 1.75395^x$$

```
Show[ListPlot[X354data[[1 ;; 20]], PlotRange -> All], Plot[X354exp[x], {x, 1, 22}]]
```

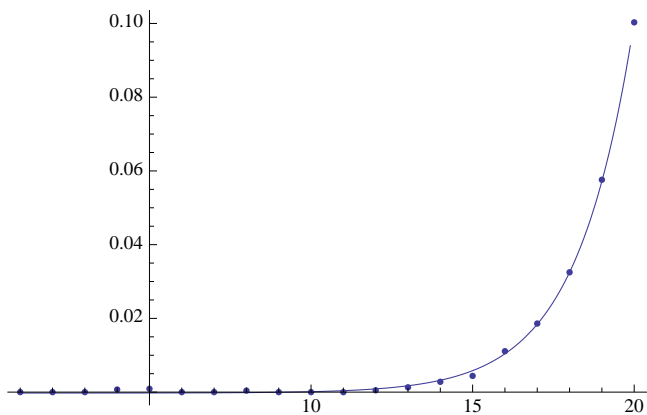

```
X411exp = NonlinearModelFit[X411data[[13 ;; 24]], b + d0 * a^x, {b, d0, a}, x, MaxIterations -> 1000]
```

```
FittedModel[[-0.00098573 + 3.4953 × 10-7 <<19>>x]]
```

```
X411exp["BestFit"]
```

$$-0.00098573 + 3.4953 \times 10^{-7} 1.66586^x$$

```
Show[ListPlot[X411data[[1 ;; 26]], PlotRange -> All], Plot[X411exp[x], {x, 1, 28}]]
```

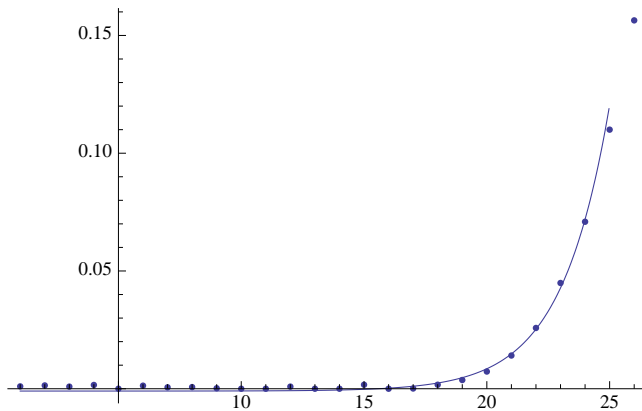

```
X412exp =
```

```
NonlinearModelFit[X412data[[13 ;; 24]], b + d0 * a^x, {b, d0, a}, x, MaxIterations -> 1000]
```

```
FittedModel[-0.000772384 + 3.98604 × 10-7 <<19>>x]
```

```
X412exp["BestFit"]
```

```
-0.000772384 + 3.98604 × 10-7 1.65521x
```

```
Show[ListPlot[X412data[[1 ;; 26]], PlotRange -> All], Plot[X412exp[x], {x, 1, 29}]]
```

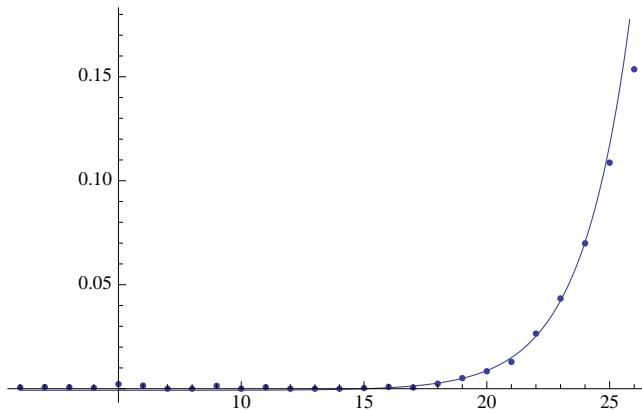

```
X413exp =
```

```
NonlinearModelFit[X413data[[13 ;; 24]], b + d0 * a^x, {b, d0, a}, x, MaxIterations -> 1000]
```

```
FittedModel[-0.000930879 + 1.87063 × 10-7 <<19>>x]
```

```
X413exp["BestFit"]
```

```
-0.000930879 + 1.87063 × 10-7 1.70983x
```



```
Show[ListPlot[X413data[[1 ;; 24]], PlotRange -> All], Plot[X413exp[x], {x, 1, 28}]]
```

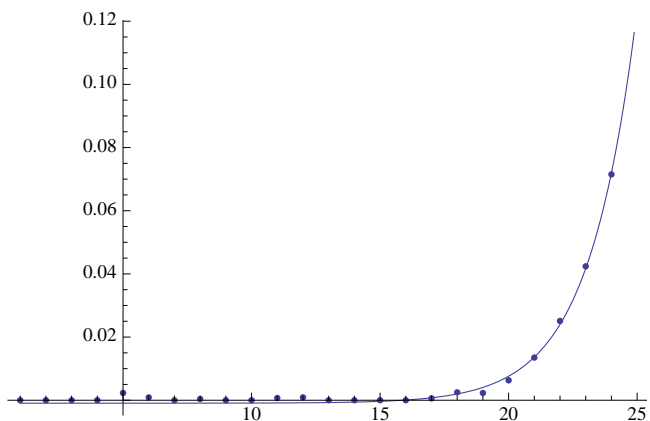

```
X414exp = NonlinearModelFit[X414data[[13 ;; 24]], b + d0 * a^x, {b, d0, a}, x, MaxIterations -> 1000]
```

```
FittedModel[[-0.000674251 + 2.07316 × 10-7 <<19>>x]]
```

```
X414exp["BestFit"]
```

$$-0.000674251 + 2.07316 \times 10^{-7} 1.70565^x$$

```
Show[ListPlot[X414data[[1 ;; 24]], PlotRange -> All], Plot[X414exp[x], {x, 1, 28}]]
```

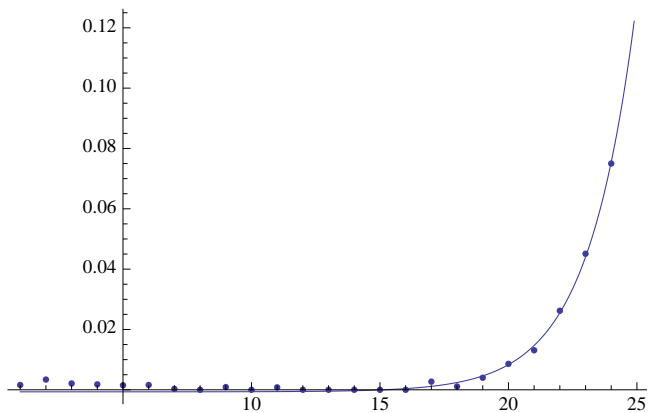

```
X421exp = NonlinearModelFit[X421data[[13 ;; 24]], b + d0 * a^x, {b, d0, a}, x, MaxIterations -> 1000]
```

```
FittedModel[[-0.000618286 + 3.8546 × 10-7 <<19>>x]]
```

```
X421exp["BestFit"]
```

$$-0.000618286 + 3.8546 \times 10^{-7} 1.66564^x$$

```
Show[ListPlot[X421data[[1 ;; 23]], PlotRange -> All], Plot[X421exp[x], {x, 1, 26}]]
```

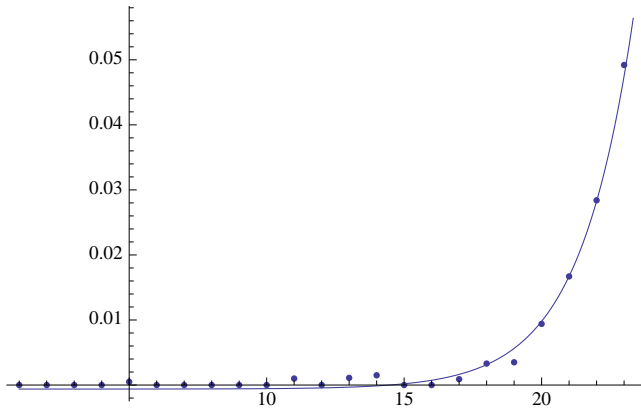

```
X422exp =
NonlinearModelFit[X422data[[10 ;; 23]], b + d0 * a^x, {b, d0, a}, x, MaxIterations -> 1000]
```

```
FittedModel[
$$-0.000032854 + 1.83662 \times 10^{-7} \ll 19 \gg^x$$
]
```

```
X422exp["BestFit"]
```

```

$$-0.000032854 + 1.83662 \times 10^{-7} 1.73312^x$$

```

```
Show[ListPlot[X422data[[1 ;; 23]], PlotRange -> All], Plot[X422exp[x], {x, 1, 26}]]
```

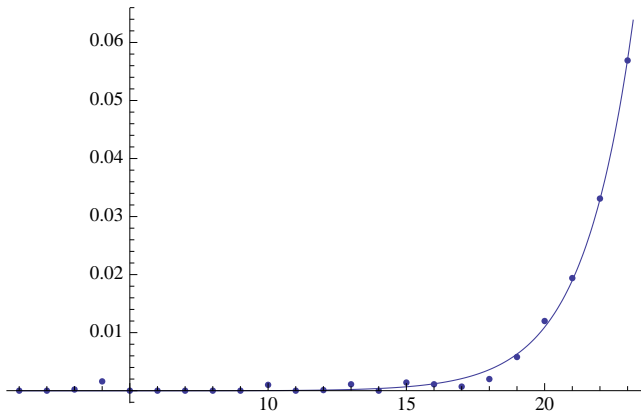

```
X423exp =
NonlinearModelFit[X423data[[12 ;; 25]], b + d0 * a^x, {b, d0, a}, x, MaxIterations -> 1000]
```

```
FittedModel[
$$-0.0013683 + 1.28066 \times 10^{-6} \ll 19 \gg^x$$
]
```

```
X423exp["BestFit"]
```

```

$$-0.0013683 + 1.28066 \times 10^{-6} 1.58555^x$$

```

```
Show[ListPlot[X423data[[1 ;; 23]], PlotRange -> All], Plot[X423exp[x], {x, 1, 26}]]
```

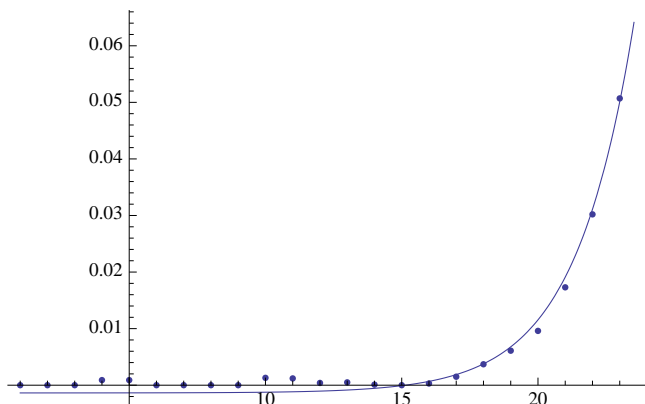

```
X424exp =
  NonlinearModelFit[X424data[[12 ;; 25]], b + d0 * a^x, {b, d0, a}, x, MaxIterations -> 1000]
```

```
FittedModel[[-0.000183795 + 9.28537 × 10-7 <<19>>x]]
```

```
X424exp["BestFit"]
```

$$-0.000183795 + 9.28537 \times 10^{-7} 1.60154^x$$

```
Show[ListPlot[X424data[[1 ;; 25]], PlotRange -> All], Plot[X424exp[x], {x, 1, 28}]]
```

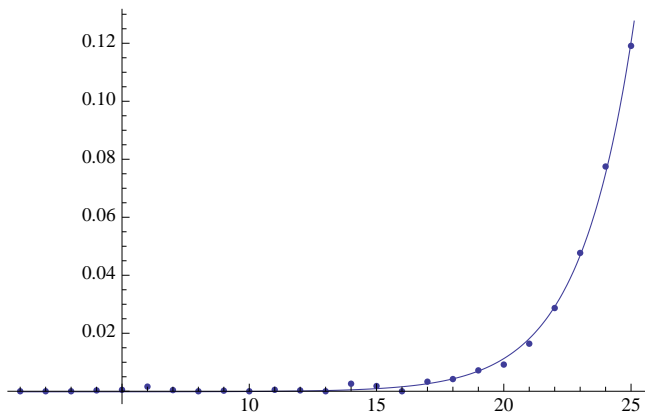

```
X431exp =
  NonlinearModelFit[X431data[[11 ;; 24]], b + d0 * a^x, {b, d0, a}, x, MaxIterations -> 1000]
```

```
FittedModel[[-0.000400246 + 3.79123 × 10-7 <<19>>x]]
```

```
X431exp["BestFit"]
```

$$-0.000400246 + 3.79123 \times 10^{-7} 1.68011^x$$

```
Show[ListPlot[X431data[[1 ;; 23]], PlotRange -> All], Plot[X431exp[x], {x, 1, 26}]]
```

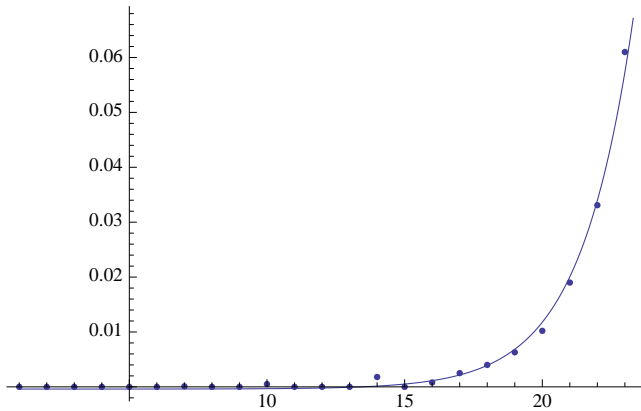

```
X432exp =
NonlinearModelFit[X432data[[11 ;; 24]], b + d0 * a^x, {b, d0, a}, x, MaxIterations -> 1000]
```

```
FittedModel [ -0.000351816 + 3.13799 × 10-7 <<18>>x ]
```

```
X432exp["BestFit"]
```

```
-0.000351816 + 3.13799 × 10-7 1.69303x
```

```
Show[ListPlot[X432data[[1 ;; 23]], PlotRange -> All], Plot[X432exp[x], {x, 1, 26}]]
```

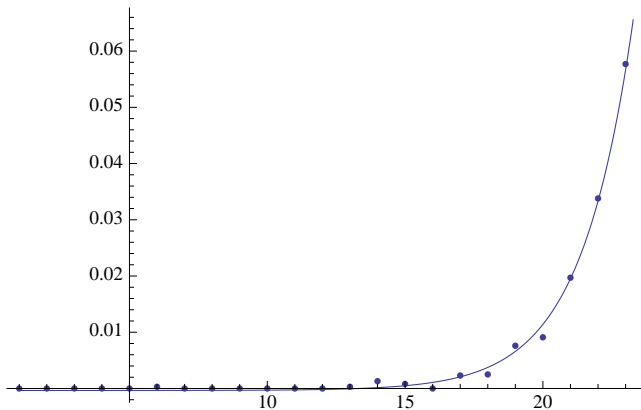

```
X433exp =
NonlinearModelFit[X433data[[11 ;; 24]], b + d0 * a^x, {b, d0, a}, x, MaxIterations -> 1000]
```

```
FittedModel [ -0.000280012 + 3.30429 × 10-7 <<18>>x ]
```

```
X433exp["BestFit"]
```

```
-0.000280012 + 3.30429 × 10-7 1.68116x
```

```
Show[ListPlot[X433data[[1 ;; 23]], PlotRange -> All], Plot[X433exp[x], {x, 1, 26}]]
```

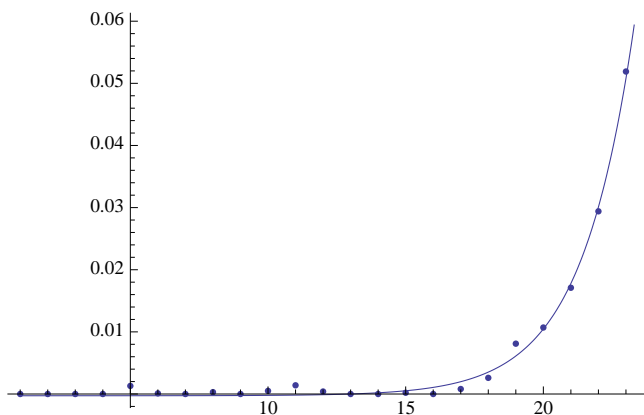

```
X434exp =
NonlinearModelFit[X434data[[11 ;; 24]], b + d0 * a^x, {b, d0, a}, x, MaxIterations -> 1000]
```

```
FittedModel [ -0.0000122649 + 3.10098 × 10-7 <<19>>x ]
```

```
X434exp["BestFit"]
```

```
-0.0000122649 + 3.10098 × 10-7 1.68435x
```

```
Show[ListPlot[X434data[[1 ;; 23]], PlotRange -> All], Plot[X434exp[x], {x, 1, 26}]]
```

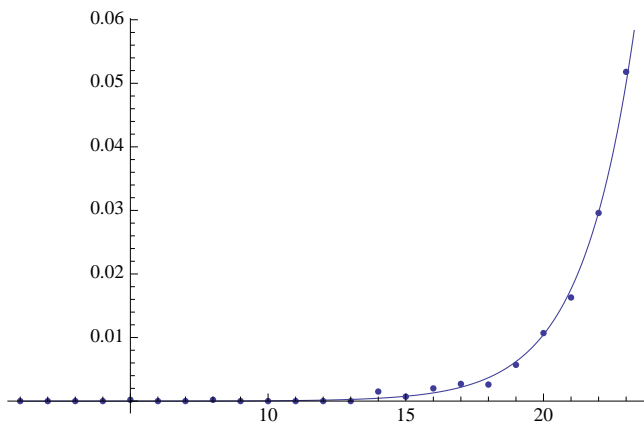

```
X441exp =
NonlinearModelFit[X441data[[13 ;; 24]], b + d0 * a^x, {b, d0, a}, x, MaxIterations -> 1000]
```

```
FittedModel [ -0.00030012 + 3.19644 × 10-7 <<19>>x ]
```

```
X441exp["BestFit"]
```

```
-0.00030012 + 3.19644 × 10-7 1.66867x
```

```
Show[ListPlot[X441data[[1 ;; 24]], PlotRange -> All], Plot[X441exp[x], {x, 1, 27}]]
```

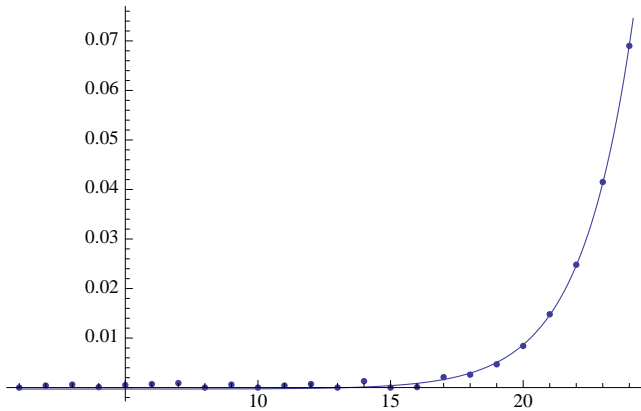

```
X442exp =
NonlinearModelFit[X442data[[13 ;; 24]], b + d0 * a^x, {b, d0, a}, x, MaxIterations -> 1000]
```

```
FittedModel[[-0.00028773 + 3.67806 × 10-7 <<19>>x]]
```

```
X442exp["BestFit"]
```

```
-0.00028773 + 3.67806 × 10-7 1.6634x
```

```
Show[ListPlot[X442data[[1 ;; 23]], PlotRange -> All], Plot[X442exp[x], {x, 1, 26}]]
```

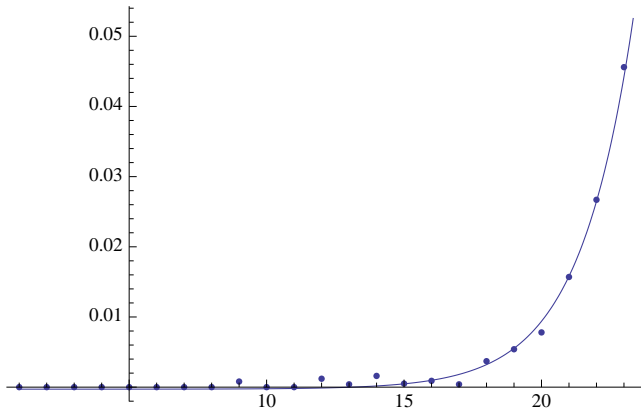

```
X443exp =
NonlinearModelFit[X443data[[13 ;; 24]], b + d0 * a^x, {b, d0, a}, x, MaxIterations -> 1000]
```

```
FittedModel[[0.000177021 + 2.62147 × 10-7 <<19>>x]]
```

```
X443exp["BestFit"]
```

```
0.000177021 + 2.62147 × 10-7 1.67969x
```

```
Show[ListPlot[X443data[[1 ;; 23]], PlotRange -> All], Plot[X443exp[x], {x, 1, 26}]]
```

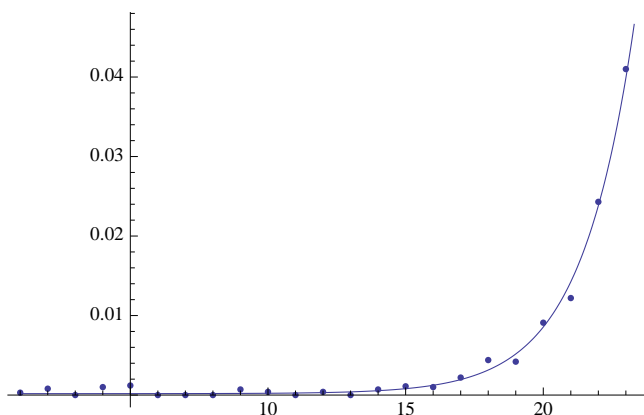

```
X444exp =  
NonlinearModelFit[X444data[[13 ;; 24]], b + d0 * a^x, {b, d0, a}, x, MaxIterations -> 1000]
```

```
FittedModel [ -0.000290316 + 2.91505 × 10-7 <<19>>x ]
```

```
X444exp["BestFit"]
```

```
-0.000290316 + 2.91505 × 10-7 1.67459x
```

```
Show[ListPlot[X444data[[1 ;; 24]], PlotRange -> All], Plot[X444exp[x], {x, 1, 27}]]
```

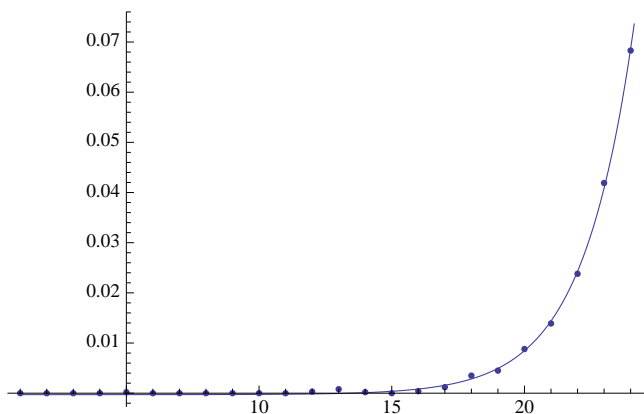

```
X451exp =  
NonlinearModelFit[X451data[[13 ;; 24]], b + d0 * a^x, {b, d0, a}, x, MaxIterations -> 1000]
```

```
FittedModel [ -0.000971878 + 5.64705 × 10-7 <<19>>x ]
```

```
X451exp["BestFit"]
```

```
-0.000971878 + 5.64705 × 10-7 1.63888x
```

```
Show[ListPlot[X451data[[1 ;; 24]], PlotRange -> All], Plot[X451exp[x], {x, 1, 27}]]
```

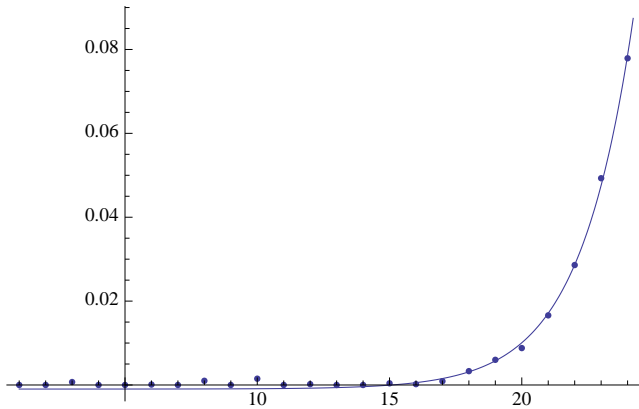

```
X452exp =
  NonlinearModelFit[X452data[[11 ;; 24]], b + d0 * a^x, {b, d0, a}, x, MaxIterations -> 1000]
```

```
FittedModel[-0.000454658 + 3.80166 × 10-7 <<18>>x]
```

```
X452exp["BestFit"]
```

```
-0.000454658 + 3.80166 × 10-7 1.6833x
```

```
Show[ListPlot[X452data[[1 ;; 24]], PlotRange -> All], Plot[X452exp[x], {x, 1, 27}]]
```

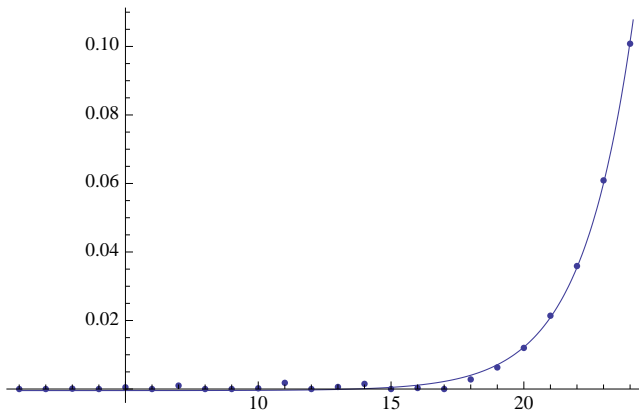

```
X453exp =
  NonlinearModelFit[X453data[[11 ;; 24]], b + d0 * a^x, {b, d0, a}, x, MaxIterations -> 1000]
```

```
FittedModel[-0.000238962 + 4.96792 × 10-7 <<19>>x]
```

```
X453exp["BestFit"]
```

```
-0.000238962 + 4.96792 × 10-7 1.65712x
```



```
Show[ListPlot[X453data[[1 ;; 24]], PlotRange -> All], Plot[X453exp[x], {x, 1, 27}]]
```

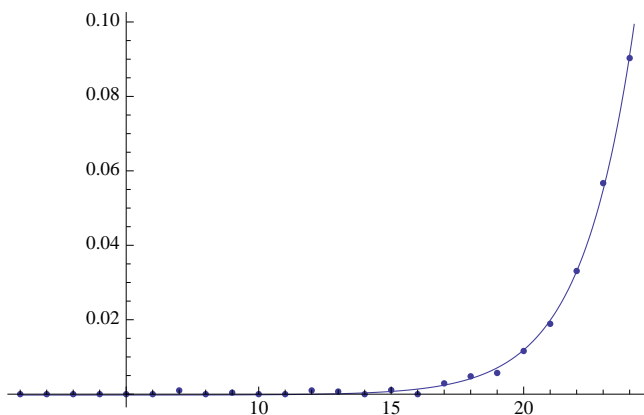

```
X454exp =
  NonlinearModelFit[X454data[[13 ;; 24]], b + d0 * a^x, {b, d0, a}, x, MaxIterations -> 1000]
```

```
FittedModel[
$$-0.000516062 + 2.61187 \times 10^{-7} \ll 19 \gg^x$$
]
```

```
X454exp["BestFit"]
```

```

$$-0.000516062 + 2.61187 \times 10^{-7} 1.69537^x$$

```

```
Show[ListPlot[X454data[[1 ;; 24]], PlotRange -> All], Plot[X454exp[x], {x, 1, 27}]]
```

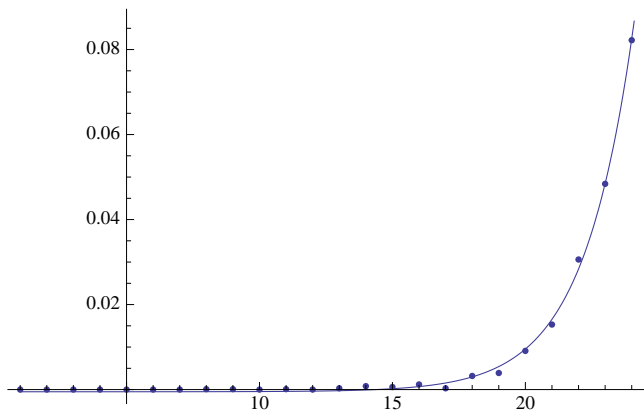

```
X511exp =
  NonlinearModelFit[X511data[[15 ;; 27]], b + d0 * a^x, {b, d0, a}, x, MaxIterations -> 1000]
```

```
FittedModel[
$$-0.000738987 + 4.47959 \times 10^{-8} \ll 19 \gg^x$$
]
```

```
X511exp["BestFit"]
```

```

$$-0.000738987 + 4.47959 \times 10^{-8} 1.71203^x$$

```

```
Show[ListPlot[X511data[[1 ;; 28]], PlotRange -> All], Plot[X511exp[x], {x, 1, 30}]]
```

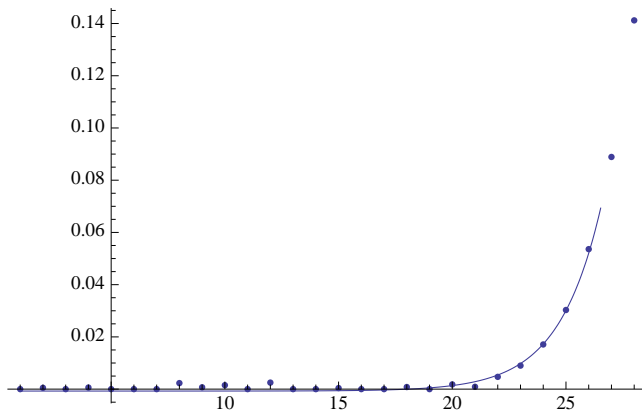

```
X512exp =
NonlinearModelFit[X512data[[15 ;; 27]], b + d0 * a^x, {b, d0, a}, x, MaxIterations -> 1000]
```

```
FittedModel[[-0.000331286 + 2.66729 × 10-8 <<19>>x]
```

```
X512exp["BestFit"]
```

```
-0.000331286 + 2.66729 × 10-8 1.74297x
```

```
Show[ListPlot[X512data[[1 ;; 27]], PlotRange -> All], Plot[X512exp[x], {x, 1, 30}]]
```

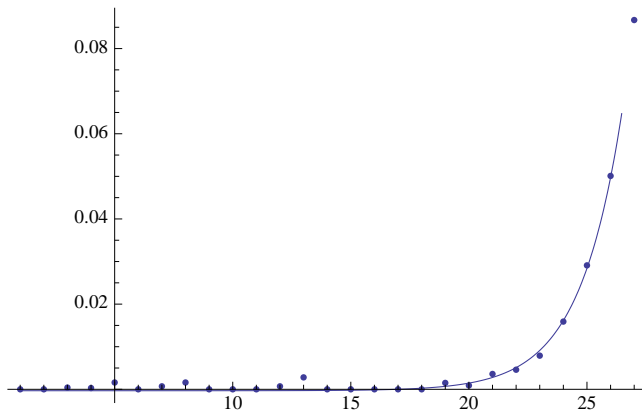

```
X513exp =
NonlinearModelFit[X513data[[15 ;; 27]], b + d0 * a^x, {b, d0, a}, x, MaxIterations -> 1000]
```

```
FittedModel[[-0.000301367 + 3.83936 × 10-8 <<19>>x]
```

```
X513exp["BestFit"]
```

```
-0.000301367 + 3.83936 × 10-8 1.71503x
```

```
Show[ListPlot[X513data[[1 ;; 27]], PlotRange -> All], Plot[X513exp[x], {x, 1, 31}]]
```

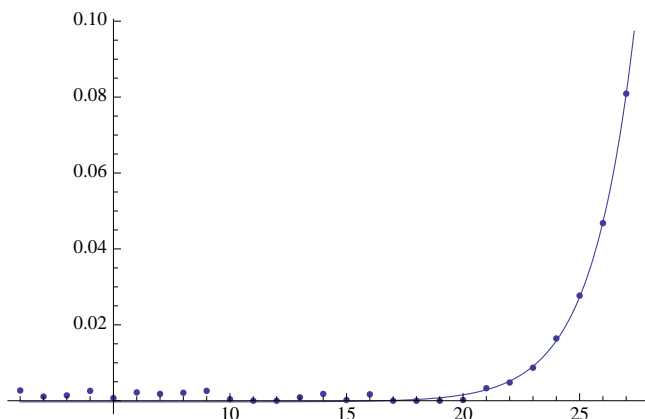

```
X514exp = NonlinearModelFit[X514data[[15 ;; 27]], b + d0 * a^x, {b, d0, a}, x, MaxIterations -> 1000]
```

```
FittedModel[ -0.000209407 + 2.03618 × 10-8 <<19>>x ]
```

```
X514exp["BestFit"]
```

$$-0.000209407 + 2.03618 \times 10^{-8} 1.74617^x$$

```
Show[ListPlot[X514data[[1 ;; 27]], PlotRange -> All], Plot[X514exp[x], {x, 1, 30}]]
```

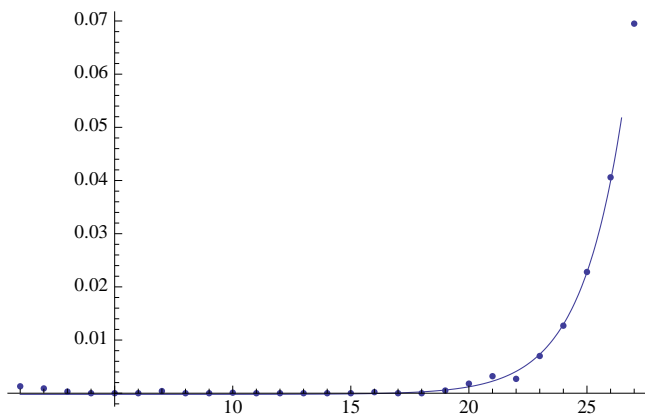

```
X521exp = NonlinearModelFit[X521data[[13 ;; 27]], b + d0 * a^x, {b, d0, a}, x, MaxIterations -> 1000]
```

```
FittedModel[ -0.000285885 + 4.9818 × 10-8 <<18>>x ]
```

```
X521exp["BestFit"]
```

$$-0.000285885 + 4.9818 \times 10^{-8} 1.69672^x$$

```
Show[ListPlot[X521data[[1 ;; 27]], PlotRange -> All], Plot[X521exp[x], {x, 1, 31}]]
```

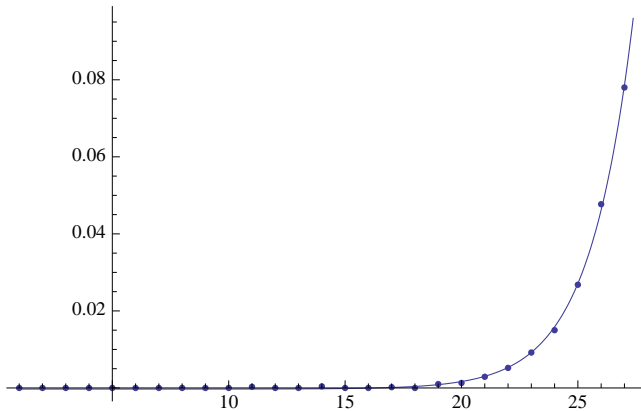

```
X522exp =
NonlinearModelFit[X522data[[13 ;; 27]], b + d0 * a^x, {b, d0, a}, x, MaxIterations -> 1000]
```

```
FittedModel [ -0.000318698 + 5.26792 × 10-8 <<19>>x ]
```

```
X522exp["BestFit"]
```

```
-0.000318698 + 5.26792 × 10-8 1.6907x
```

```
Show[ListPlot[X522data[[1 ;; 27]], PlotRange -> All], Plot[X522exp[x], {x, 1, 31}]]
```

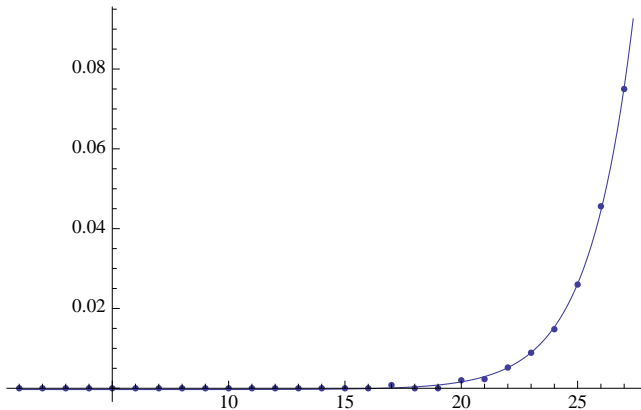

```
X523exp =
NonlinearModelFit[X523data[[13 ;; 27]], b + d0 * a^x, {b, d0, a}, x, MaxIterations -> 1000]
```

```
FittedModel [ -0.000354803 + 3.74318 × 10-8 <<19>>x ]
```

```
X523exp["BestFit"]
```

```
-0.000354803 + 3.74318 × 10-8 1.716x
```

```
Show[ListPlot[X523data[[1 ;; 27]], PlotRange -> All], Plot[X523exp[x], {x, 1, 31}]]
```

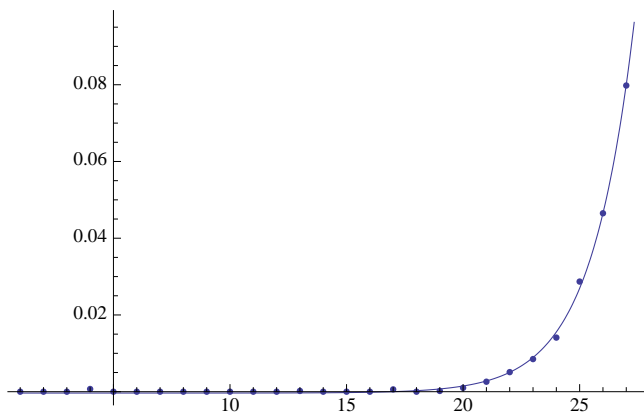

```
X524exp =
NonlinearModelFit[X524data[[13 ;; 27]], b + d0 * a^x, {b, d0, a}, x, MaxIterations -> 1000]
```

```
FittedModel[-0.000200681 + 2.2863 × 10-8 <<18>>x]
```

```
X524exp["BestFit"]
```

```
-0.000200681 + 2.2863 × 10-8 1.7433x
```

```
Show[ListPlot[X524data[[1 ;; 27]], PlotRange -> All], Plot[X524exp[x], {x, 1, 31}]]
```

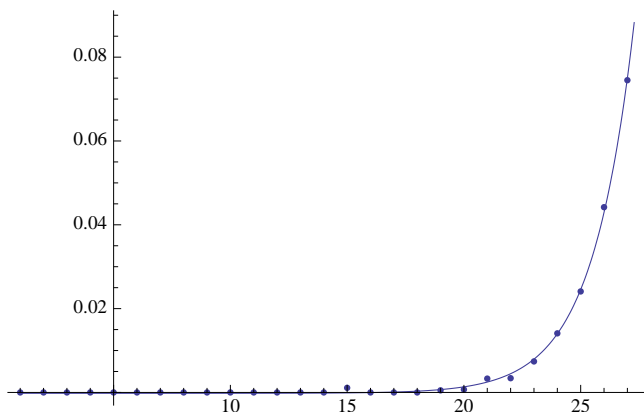

```
X531exp =
NonlinearModelFit[X531data[[13 ;; 27]], b + d0 * a^x, {b, d0, a}, x, MaxIterations -> 1000]
```

```
FittedModel[-0.000509783 + 7.10334 × 10-8 <<19>>x]
```

```
X531exp["BestFit"]
```

```
-0.000509783 + 7.10334 × 10-8 1.67938x
```

```
Show[ListPlot[X531data[[1 ;; 27]], PlotRange -> All], Plot[X531exp[x], {x, 1, 31}]]
```

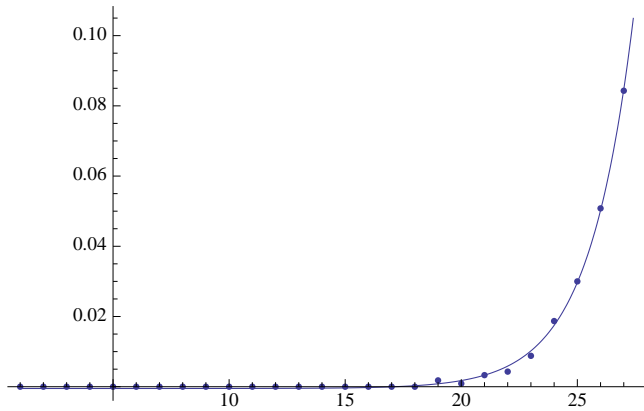

```
X532exp =
```

```
NonlinearModelFit[X532data[[13 ;; 27]], b + d0 * a^x, {b, d0, a}, x, MaxIterations -> 1000]
```

```
FittedModel[
$$-0.000262809 + 4.7395 \times 10^{-8} \ll 18 \gg^x$$
]
```

```
X532exp["BestFit"]
```

```

$$-0.000262809 + 4.7395 \times 10^{-8} 1.7032^x$$

```

```
Show[ListPlot[X532data[[1 ;; 27]], PlotRange -> All], Plot[X532exp[x], {x, 1, 31}]]
```

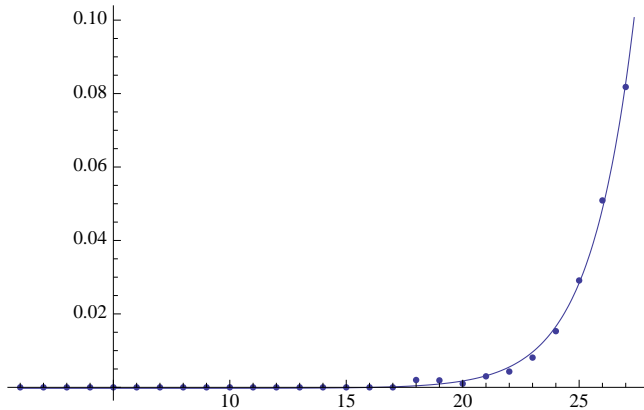

```
X533exp =
```

```
NonlinearModelFit[X533data[[13 ;; 27]], b + d0 * a^x, {b, d0, a}, x, MaxIterations -> 1000]
```

```
FittedModel[
$$-0.000370126 + 3.02444 \times 10^{-8} \ll 19 \gg^x$$
]
```

```
X533exp["BestFit"]
```

```

$$-0.000370126 + 3.02444 \times 10^{-8} 1.73662^x$$

```

```
Show[ListPlot[X533data[[1 ;; 27]], PlotRange -> All], Plot[X533exp[x], {x, 1, 31}]]
```

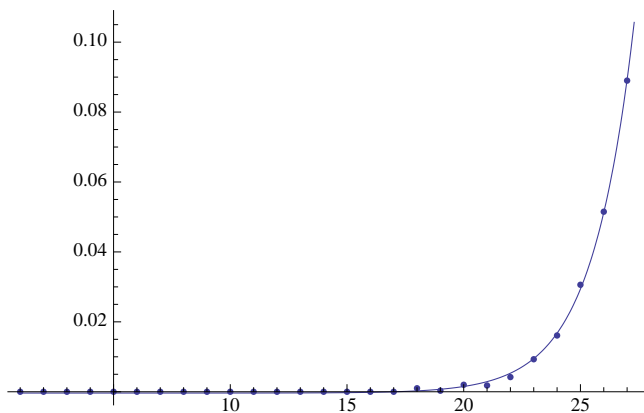

```
X534exp =
```

```
NonlinearModelFit[X534data[[13 ;; 27]], b + d0 * a^x, {b, d0, a}, x, MaxIterations -> 1000]
```

```
FittedModel[[-0.000524581 + 6.14339 × 10-8 <<19>>x]
```

```
X534exp["BestFit"]
```

```
-0.000524581 + 6.14339 × 10-8 1.68776x
```

```
Show[ListPlot[X534data[[1 ;; 27]], PlotRange -> All], Plot[X534exp[x], {x, 1, 31}]]
```

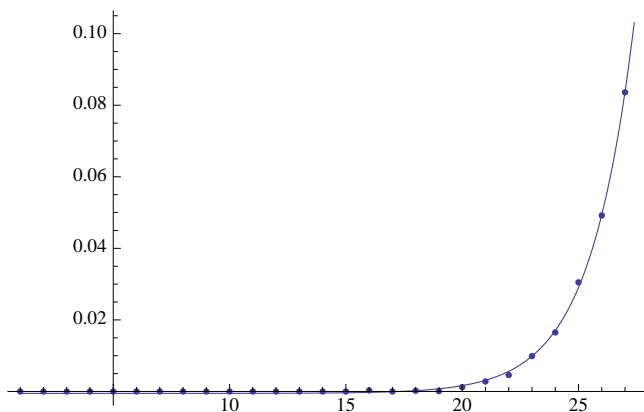

```
X541exp =
```

```
NonlinearModelFit[X541data[[14 ;; 28]], b + d0 * a^x, {b, d0, a}, x, MaxIterations -> 1000]
```

```
FittedModel[[-0.00113956 + 1.33382 × 10-7 <<19>>x]
```

```
X541exp["BestFit"]
```

```
-0.00113956 + 1.33382 × 10-7 1.62869x
```

```
Show[ListPlot[X541data[[1 ;; 28]], PlotRange -> All], Plot[X541exp[x], {x, 1, 32}]]
```

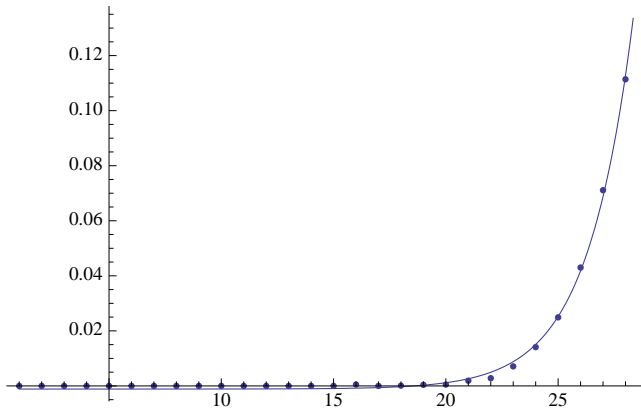

```
X542exp =
NonlinearModelFit[X542data[[14 ;; 28]], b + d0 * a^x, {b, d0, a}, x, MaxIterations -> 1000]
```

```
FittedModel[-0.000649883 + 4.58214 × 10-8 <<16>>x]
```

```
X542exp["BestFit"]
```

```
-0.000649883 + 4.58214 × 10-8 1.68604x
```

```
Show[ListPlot[X542data[[1 ;; 28]], PlotRange -> All], Plot[X542exp[x], {x, 1, 32}]]
```

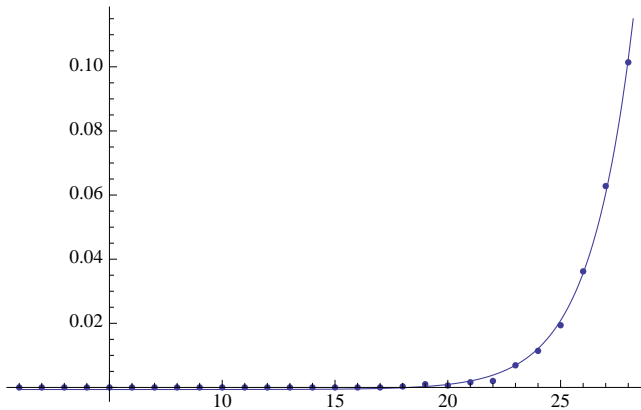

```
X543exp =
NonlinearModelFit[X543data[[13 ;; 27]], b + d0 * a^x, {b, d0, a}, x, MaxIterations -> 1000]
```

```
FittedModel[-0.00040915 + 3.17519 × 10-8 <<19>>x]
```

```
X543exp["BestFit"]
```

```
-0.00040915 + 3.17519 × 10-8 1.72533x
```



```
Show[ListPlot[X543data[[1 ;; 27]], PlotRange -> All], Plot[X543exp[x], {x, 1, 31}]]
```

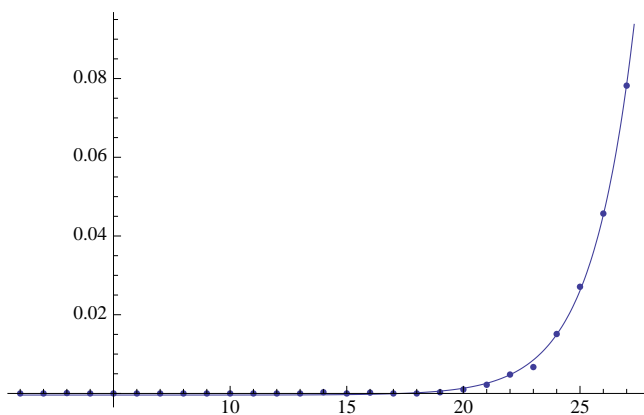

```
X544exp =
NonlinearModelFit[X544data[[14 ;; 28]], b + d0 * a^x, {b, d0, a}, x, MaxIterations -> 1000]
```

```
FittedModel[
$$-0.000889306 + 1.44809 \times 10^{-7} \ll 19 \gg^x$$
]
```

```
X544exp["BestFit"]
```

```

$$-0.000889306 + 1.44809 \times 10^{-7} 1.61614^x$$

```

```
Show[ListPlot[X544data[[1 ;; 28]], PlotRange -> All], Plot[X544exp[x], {x, 1, 32}]]
```

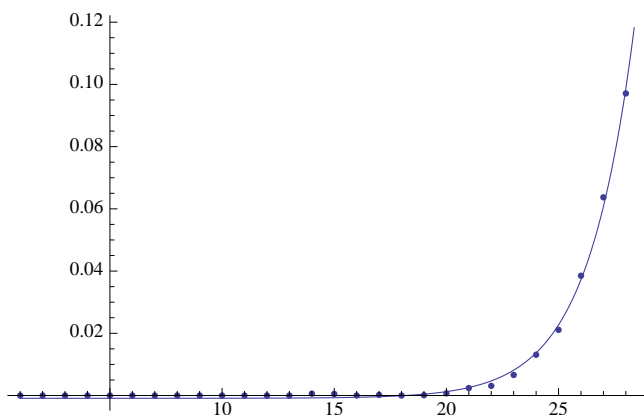

```
X551exp =
NonlinearModelFit[X551data[[13 ;; 27]], b + d0 * a^x, {b, d0, a}, x, MaxIterations -> 1000]
```

```
FittedModel[
$$-0.000287049 + 4.57546 \times 10^{-8} \ll 18 \gg^x$$
]
```

```
X551exp["BestFit"]
```

```

$$-0.000287049 + 4.57546 \times 10^{-8} 1.69713^x$$

```

```
Show[ListPlot[X551data[[1 ;; 27]], PlotRange -> All], Plot[X551exp[x], {x, 1, 31}]]
```

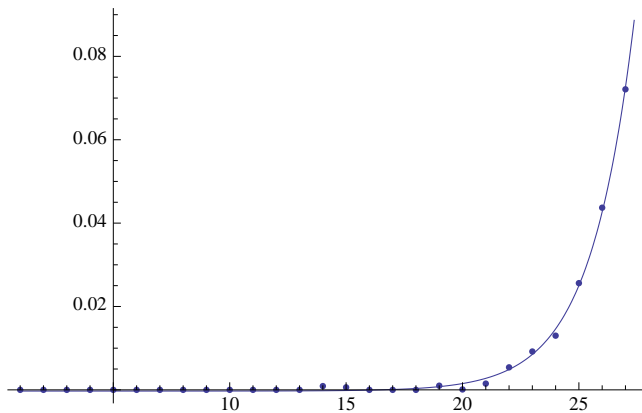

```
X552exp =
NonlinearModelFit[X552data[[13 ;; 27]], b + d0 * a^x, {b, d0, a}, x, MaxIterations -> 1000]
```

```
FittedModel [ -0.000357023 + 2.83702 × 10-8 <<19>>x ]
```

```
X552exp["BestFit"]
```

```
-0.000357023 + 2.83702 × 10-8 1.72954x
```

```
Show[ListPlot[X552data[[1 ;; 27]], PlotRange -> All], Plot[X552exp[x], {x, 1, 31}]]
```

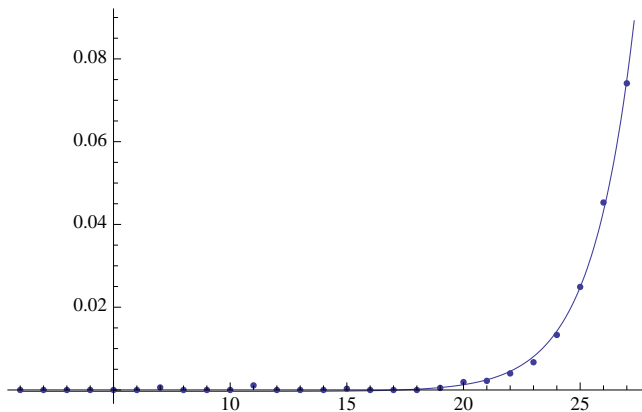

```
X553exp =
NonlinearModelFit[X553data[[13 ;; 27]], b + d0 * a^x, {b, d0, a}, x, MaxIterations -> 1000]
```

```
FittedModel [ -0.000262054 + 4.40371 × 10-8 <<19>>x ]
```

```
X553exp["BestFit"]
```

```
-0.000262054 + 4.40371 × 10-8 1.70584x
```

```
Show[ListPlot[X553data[[1 ;; 27]], PlotRange -> All], Plot[X553exp[x], {x, 1, 31}]]
```

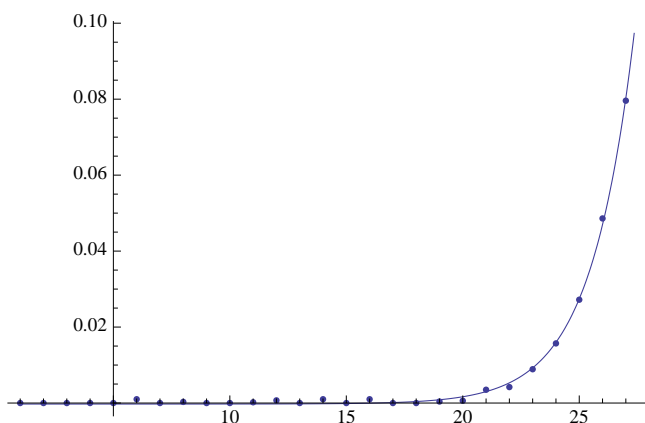

```
X554exp =
  NonlinearModelFit[X554data[[14 ;; 28]], b + d0 * a^x, {b, d0, a}, x, MaxIterations -> 1000]
```

```
FittedModel [ -0.000684677 + 8.24391 × 10-8 <<19>>x ]
```

```
X554exp["BestFit"]
```

$$-0.000684677 + 8.24391 \times 10^{-8} 1.65668^x$$

```
Show[ListPlot[X554data[[1 ;; 28]], PlotRange -> All], Plot[X554exp[x], {x, 1, 32}]]
```

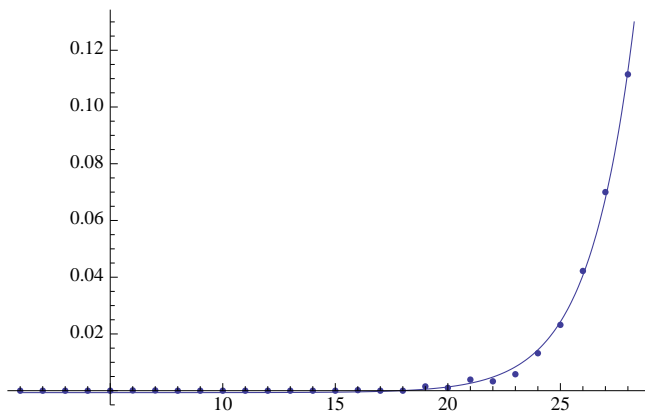

```
X611exp =
  NonlinearModelFit[X611data[[18 ;; 30]], b + d0 * a^x, {b, d0, a}, x, MaxIterations -> 1000]
```

```
FittedModel [ -0.0000908231 + 2.98514 × 10-9 <<19>>x ]
```

```
X611exp["BestFit"]
```

$$-0.0000908231 + 2.98514 \times 10^{-9} 1.74162^x$$

```
Show[ListPlot[X611data[[1 ;; 30]], PlotRange -> All], Plot[X611exp[x], {x, 1, 35}]]
```

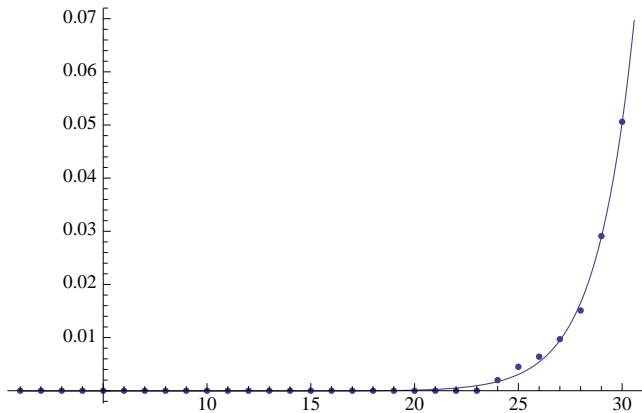

```
X612exp =
NonlinearModelFit[X612data[[18 ;; 30]], b + d0 * a^x, {b, d0, a}, x, MaxIterations -> 1000]
```

```
FittedModel [ -0.000518142 + 4.44221 × 10-9 <<19>>x ]
```

```
X612exp["BestFit"]
```

```
-0.000518142 + 4.44221 × 10-9 1.72556x
```

```
Show[ListPlot[X612data[[1 ;; 30]], PlotRange -> All], Plot[X612exp[x], {x, 1, 35}]]
```

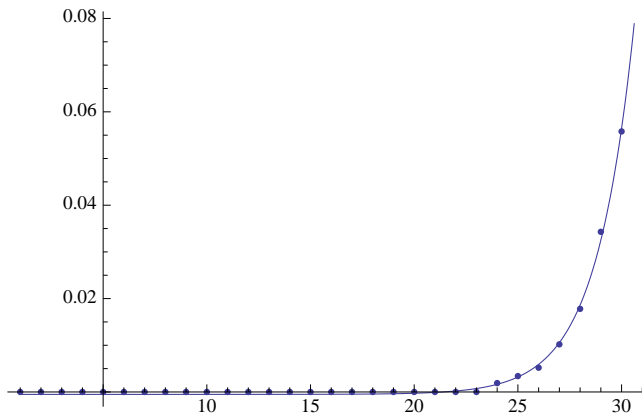

```
X613exp =
NonlinearModelFit[X613data[[18 ;; 30]], b + d0 * a^x, {b, d0, a}, x, MaxIterations -> 1000]
```

```
FittedModel [ -0.000404431 + 1.63179 × 10-9 <<19>>x ]
```

```
X613exp["BestFit"]
```

```
-0.000404431 + 1.63179 × 10-9 1.78923x
```

```
Show[ListPlot[X613data[[1 ;; 30]], PlotRange -> All], Plot[X613exp[x], {x, 1, 35}]]
```

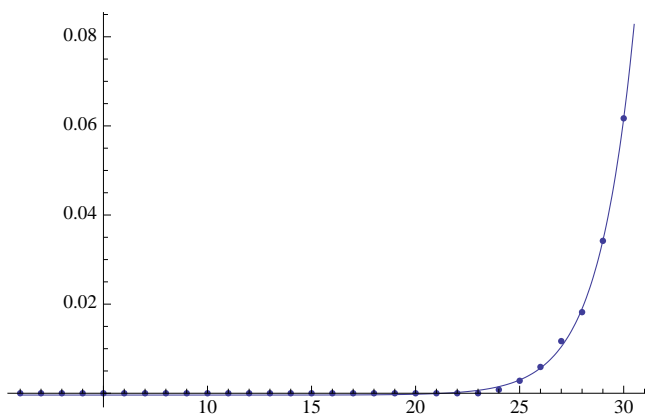

```
X614exp = NonlinearModelFit[X614data[[18 ;; 30]], b + d0 * a^x, {b, d0, a}, x, MaxIterations -> 1000]
```

```
FittedModel[[-0.000431056 + 2.66141 × 10-9 <<18>>x]]
```

```
X614exp["BestFit"]
```

$$-0.000431056 + 2.66141 \times 10^{-9} 1.76091^x$$

```
Show[ListPlot[X614data[[1 ;; 30]], PlotRange -> All], Plot[X614exp[x], {x, 1, 35}]]
```

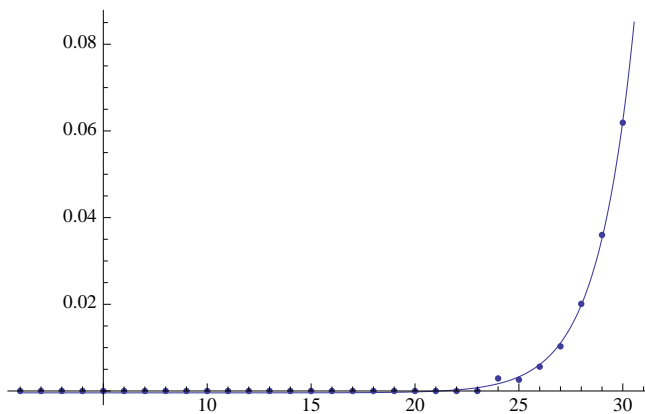

```
X621exp = NonlinearModelFit[X621data[[15 ;; 31]], b + d0 * a^x, {b, d0, a}, x, MaxIterations -> 1000]
```

```
FittedModel[[-0.000225625 + 8.27961 × 10-9 <<19>>x]]
```

```
X621exp["BestFit"]
```

$$-0.000225625 + 8.27961 \times 10^{-9} 1.68574^x$$

```
Show[ListPlot[X621data[[1 ;; 31]], PlotRange -> All], Plot[X621exp[x], {x, 1, 35}]]
```

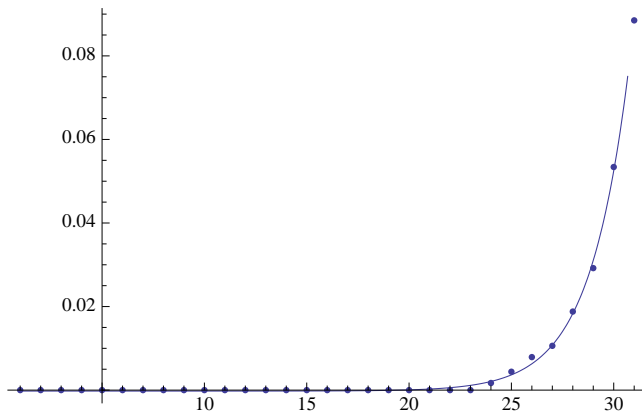

```
X622exp =
NonlinearModelFit[X622data[[15 ;; 31]], b + d0 * a^x, {b, d0, a}, x, MaxIterations -> 1000]
```

```
FittedModel[
$$-0.000538851 + 8.27626 \times 10^{-9} \ll 19 \gg^x$$
]
```

```
X622exp["BestFit"]
```

```

$$-0.000538851 + 8.27626 \times 10^{-9} 1.68927^x$$

```

```
Show[ListPlot[X622data[[1 ;; 31]], PlotRange -> All], Plot[X622exp[x], {x, 1, 35}]]
```

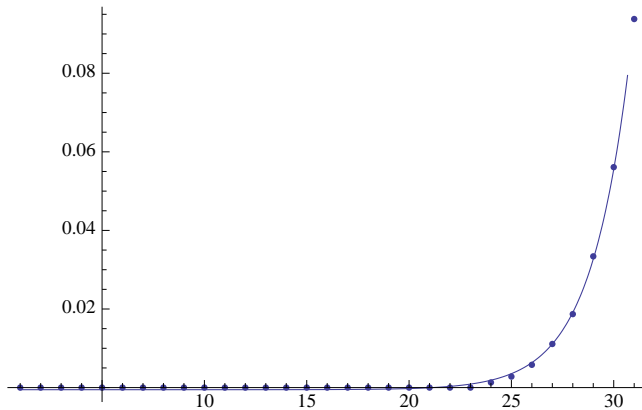

```
X623exp =
NonlinearModelFit[X623data[[15 ;; 31]], b + d0 * a^x, {b, d0, a}, x, MaxIterations -> 1000]
```

```
FittedModel[
$$-0.000440008 + 8.04808 \times 10^{-9} \ll 19 \gg^x$$
]
```

```
X623exp["BestFit"]
```

```

$$-0.000440008 + 8.04808 \times 10^{-9} 1.69071^x$$

```

```
Show[ListPlot[X623data[[1 ;; 31]], PlotRange -> All], Plot[X623exp[x], {x, 1, 35}]]
```

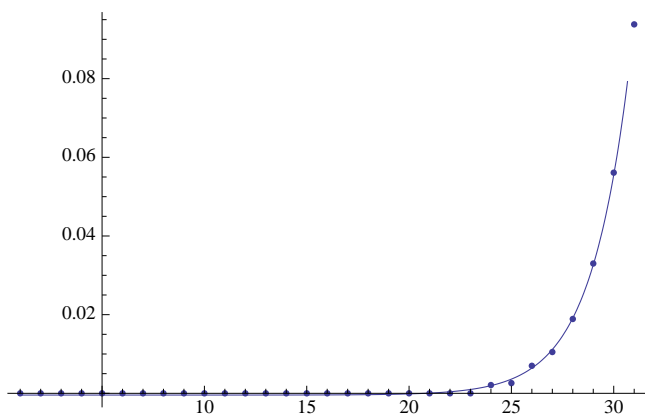

```
X624exp = NonlinearModelFit[X624data[[15 ;; 31]], b + d0 * a^x, {b, d0, a}, x, MaxIterations -> 1000]
```

```
FittedModel[[-0.00061082 + 1.01173 × 10-8 <<19>>x]]
```

```
X624exp["BestFit"]
```

$$-0.00061082 + 1.01173 \times 10^{-8} 1.67564^x$$

```
Show[ListPlot[X624data[[1 ;; 31]], PlotRange -> All], Plot[X624exp[x], {x, 1, 35}]]
```

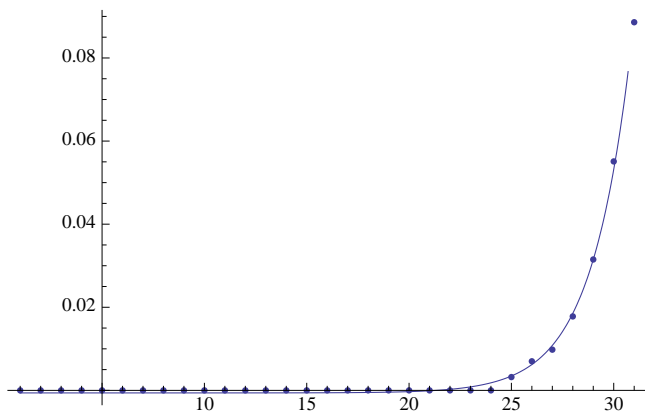

```
X631exp = NonlinearModelFit[X631data[[15 ;; 31]], b + d0 * a^x, {b, d0, a}, x, MaxIterations -> 1000]
```

```
FittedModel[[-0.000361452 + 8.02935 × 10-9 <<18>>x]]
```

```
X631exp["BestFit"]
```

$$-0.000361452 + 8.02935 \times 10^{-9} 1.69356^x$$

```
Show[ListPlot[X631data[[1 ;; 31]], PlotRange -> All], Plot[X631exp[x], {x, 1, 35}]]
```

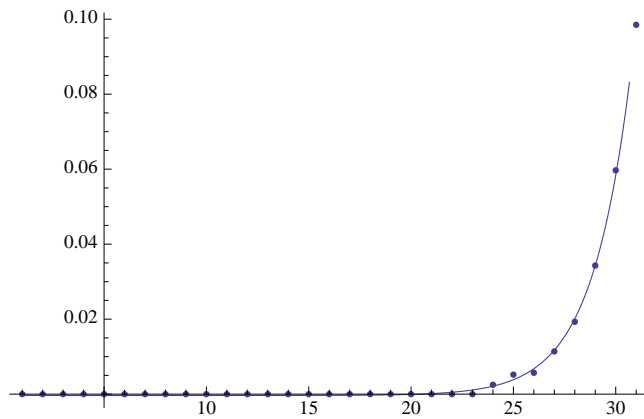

```
X632exp =
```

```
NonlinearModelFit[X632data[[15 ;; 31]], b + d0 * a^x, {b, d0, a}, x, MaxIterations -> 1000]
```

```
FittedModel [ -0.000649099 + 7.51224 × 10-9 <<19>>x ]
```

```
X632exp["BestFit"]
```

```
-0.000649099 + 7.51224 × 10-9 1.6991x
```

```
Show[ListPlot[X632data[[1 ;; 31]], PlotRange -> All], Plot[X632exp[x], {x, 1, 35}]]
```

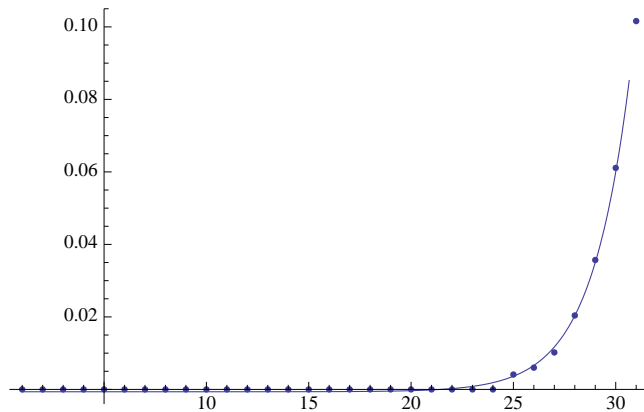

```
X633exp =
```

```
NonlinearModelFit[X633data[[15 ;; 31]], b + d0 * a^x, {b, d0, a}, x, MaxIterations -> 1000]
```

```
FittedModel [ -0.00073083 + 1.83628 × 10-8 <<19>>x ]
```

```
X633exp["BestFit"]
```

```
-0.00073083 + 1.83628 × 10-8 1.6502x
```



```
Show[ListPlot[X633data[[1 ;; 31]], PlotRange -> All], Plot[X633exp[x], {x, 1, 35}]]
```

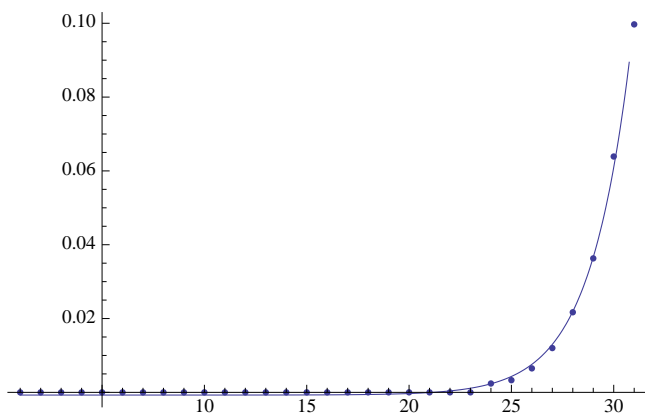

```
X634exp = NonlinearModelFit[X634data[[15 ;; 31]], b + d0 * a^x, {b, d0, a}, x, MaxIterations -> 1000]
```

```
FittedModel[[-0.000689452 + 9.46028 × 10-9 <<17>>x]
```

```
X634exp["BestFit"]
```

$$-0.000689452 + 9.46028 \times 10^{-9} 1.68271^x$$

```
Show[ListPlot[X634data[[1 ;; 31]], PlotRange -> All], Plot[X634exp[x], {x, 1, 35}]]
```

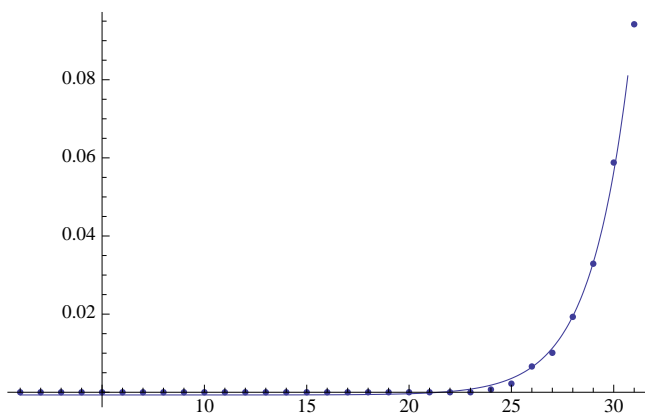

```
X641exp = NonlinearModelFit[X641data[[15 ;; 31]], b + d0 * a^x, {b, d0, a}, x, MaxIterations -> 1000]
```

```
FittedModel[[-0.000648255 + 7.73739 × 10-9 <<19>>x]
```

```
X641exp["BestFit"]
```

$$-0.000648255 + 7.73739 \times 10^{-9} 1.68535^x$$

```
Show[ListPlot[X641data[[1 ;; 31]], PlotRange -> All], Plot[X641exp[x], {x, 1, 35}]]
```

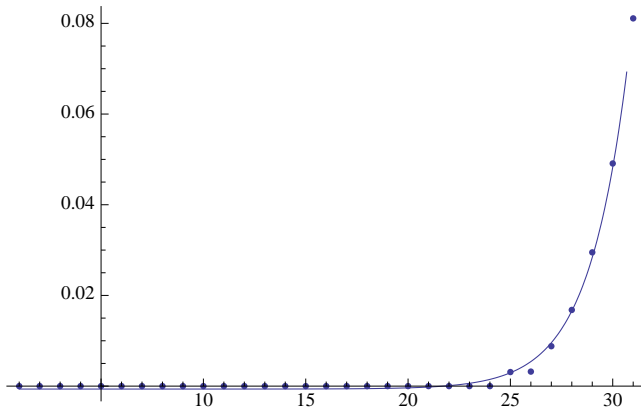

```
X642exp =
NonlinearModelFit[X642data[[15 ;; 31]], b + d0 * a^x, {b, d0, a}, x, MaxIterations -> 1000]
```

```
FittedModel [ -0.000661835 + 1.13516 × 10-8 <<19>>x ]
```

```
X642exp["BestFit"]
```

```
-0.000661835 + 1.13516 × 10-8 1.65859x
```

```
Show[ListPlot[X642data[[1 ;; 31]], PlotRange -> All], Plot[X642exp[x], {x, 1, 35}]]
```

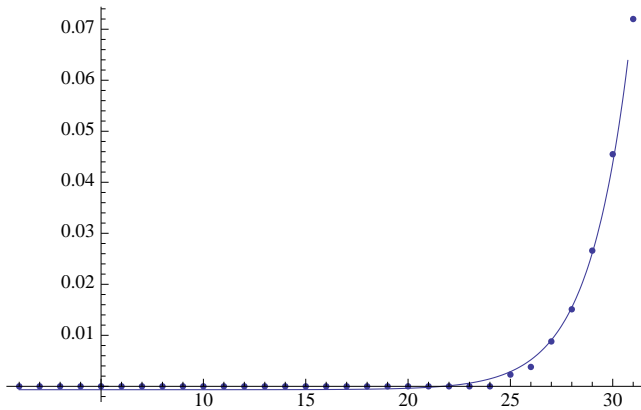

```
X643exp =
NonlinearModelFit[X643data[[15 ;; 32]], b + d0 * a^x, {b, d0, a}, x, MaxIterations -> 1000]
```

```
FittedModel [ -0.000810245 + 3.94578 × 10-8 <<19>>x ]
```

```
X643exp["BestFit"]
```

```
-0.000810245 + 3.94578 × 10-8 1.58553x
```

```
Show[ListPlot[X643data[[1 ;; 32]], PlotRange -> All], Plot[X643exp[x], {x, 1, 37}]]
```

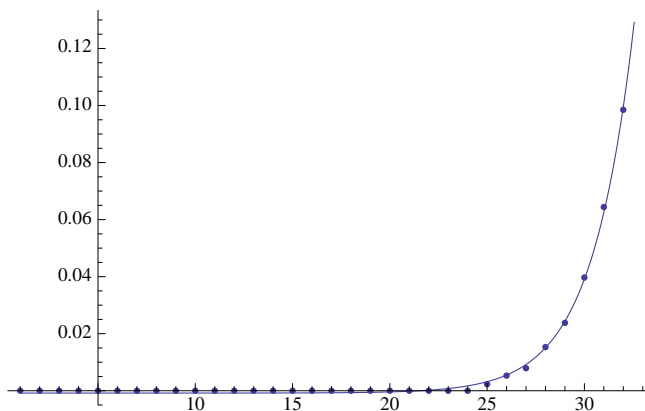

```
X644exp =
NonlinearModelFit[X644data[[15 ;; 32]], b + d0 * a^x, {b, d0, a}, x, MaxIterations -> 1000]
```

```
FittedModel[[-0.00102383 + 2.40278 × 10-8 <<18>>x]]
```

```
X644exp["BestFit"]
```

$$-0.00102383 + 2.40278 \times 10^{-8} 1.61025^x$$

```
Show[ListPlot[X644data[[1 ;; 32]], PlotRange -> All], Plot[X644exp[x], {x, 1, 37}]]
```

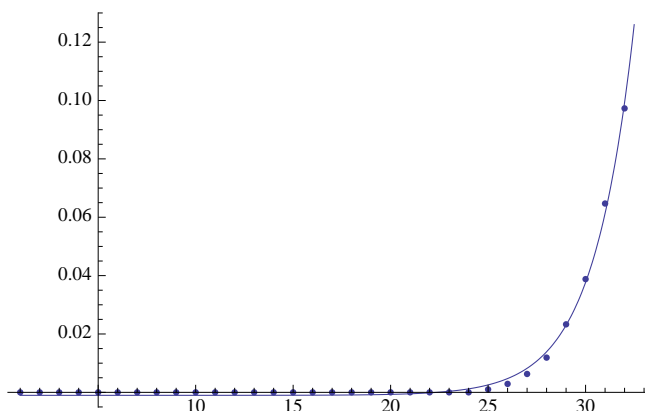

```
X651exp =
NonlinearModelFit[X651data[[15 ;; 31]], b + d0 * a^x, {b, d0, a}, x, MaxIterations -> 1000]
```

```
FittedModel[[-0.000700728 + 1.03121 × 10-8 <<19>>x]]
```

```
X651exp["BestFit"]
```

$$-0.000700728 + 1.03121 \times 10^{-8} 1.67175^x$$

```
Show[ListPlot[X651data[[1 ;; 31]], PlotRange -> All], Plot[X651exp[x], {x, 1, 37}]]
```

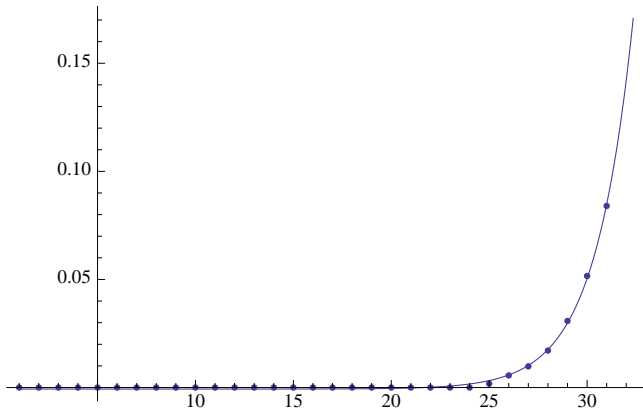

```
X652exp =
```

```
NonlinearModelFit[X652data[[15 ;; 31]], b + d0 * a^x, {b, d0, a}, x, MaxIterations -> 1000]
```

```
FittedModel[-0.00067847 + 8.8 × 10-9 <<19>>x]
```

```
X652exp["BestFit"]
```

```
-0.00067847 + 8.8 × 10-9 1.68613x
```

```
Show[ListPlot[X652data[[1 ;; 31]], PlotRange -> All], Plot[X652exp[x], {x, 1, 36}]]
```

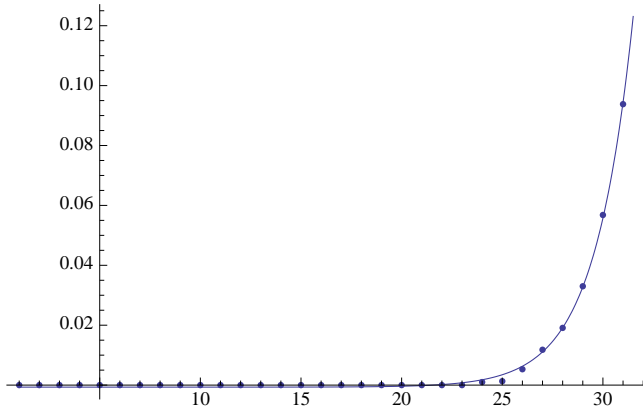

```
X653exp =
```

```
NonlinearModelFit[X653data[[15 ;; 31]], b + d0 * a^x, {b, d0, a}, x, MaxIterations -> 1000]
```

```
FittedModel[-0.000706141 + 9.94051 × 10-9 <<19>>x]
```

```
X653exp["BestFit"]
```

```
-0.000706141 + 9.94051 × 10-9 1.67423x
```

```
Show[ListPlot[X653data[[1 ;; 31]], PlotRange -> All], Plot[X653exp[x], {x, 1, 36}]]
```

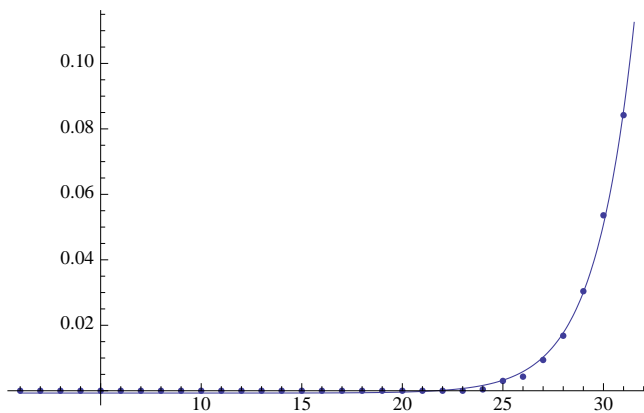

```
X654exp =
```

```
NonlinearModelFit[X654data[[15 ;; 31]], b + d0 * a^x, {b, d0, a}, x, MaxIterations -> 1000]
```

```
FittedModel[[-0.000464563 + 6.94442 × 10-9 <<19>>x]
```

```
X654exp["BestFit"]
```

```
-0.000464563 + 6.94442 × 10-9 1.6828x
```

```
Show[ListPlot[X654data[[1 ;; 31]], PlotRange -> All], Plot[X654exp[x], {x, 1, 36}]]
```

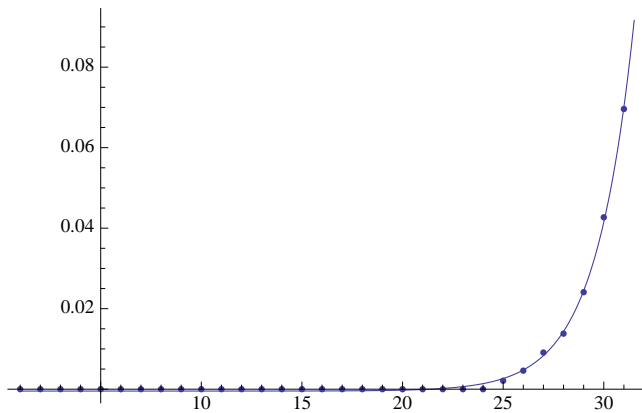

```
indata = Import["reps.csv"];
cycle = indata[[All, 1]][[2 ;;]];

```

```
F11data = Transpose[{cycle, indata[[All, 3]][[2 ;;]]};
F12data = Transpose[{cycle, indata[[All, 4]][[2 ;;]]};
F13data = Transpose[{cycle, indata[[All, 5]][[2 ;;]]};
F14data = Transpose[{cycle, indata[[All, 6]][[2 ;;]]};
F21data = Transpose[{cycle, indata[[All, 7]][[2 ;;]]};
F22data = Transpose[{cycle, indata[[All, 8]][[2 ;;]]};
F23data = Transpose[{cycle, indata[[All, 9]][[2 ;;]]};
F24data = Transpose[{cycle, indata[[All, 10]][[2 ;;]]};
F31data = Transpose[{cycle, indata[[All, 11]][[2 ;;]]};
F32data = Transpose[{cycle, indata[[All, 12]][[2 ;;]]};
F33data = Transpose[{cycle, indata[[All, 13]][[2 ;;]]};
F34data = Transpose[{cycle, indata[[All, 14]][[2 ;;]]};
F41data = Transpose[{cycle, indata[[All, 15]][[2 ;;]]};
F42data = Transpose[{cycle, indata[[All, 16]][[2 ;;]]};
F43data = Transpose[{cycle, indata[[All, 17]][[2 ;;]]};
F44data = Transpose[{cycle, indata[[All, 18]][[2 ;;]]};
F51data = Transpose[{cycle, indata[[All, 19]][[2 ;;]]};
F52data = Transpose[{cycle, indata[[All, 20]][[2 ;;]]};
F53data = Transpose[{cycle, indata[[All, 21]][[2 ;;]]};
F54data = Transpose[{cycle, indata[[All, 22]][[2 ;;]]};
F61data = Transpose[{cycle, indata[[All, 23]][[2 ;;]]};
F62data = Transpose[{cycle, indata[[All, 24]][[2 ;;]]};
F63data = Transpose[{cycle, indata[[All, 25]][[2 ;;]]};
F64data = Transpose[{cycle, indata[[All, 26]][[2 ;;]]};
F71data = Transpose[{cycle, indata[[All, 27]][[2 ;;]]};
F72data = Transpose[{cycle, indata[[All, 28]][[2 ;;]]};
F73data = Transpose[{cycle, indata[[All, 29]][[2 ;;]]};
F74data = Transpose[{cycle, indata[[All, 30]][[2 ;;]]};

```

```
F11exp = NonlinearModelFit[F11data[[1 ;; 15]], b + d0 * a^x, {b, d0, a}, x, MaxIterations -> 1000]
```

```
FittedModel[0.00100241 + 0.00036582 <<19>>^x]
```

```
F11exp["BestFit"]
```

```
0.00100241 + 0.00036582 1.74643x
```

```
Show[ListPlot[F11data[[1 ;; 15]], PlotRange -> All], Plot[F11exp[x], {x, 1, 17}]]
```

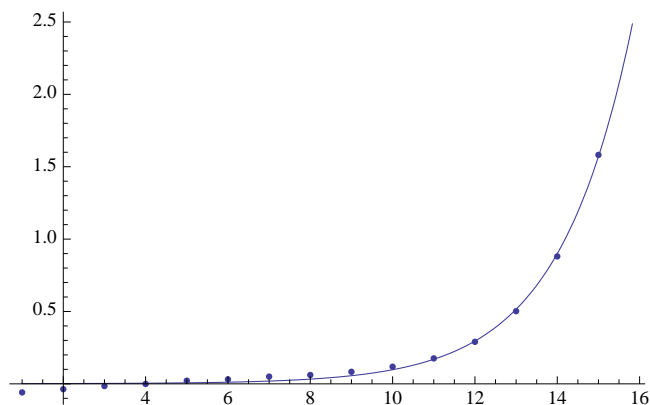

```
F12exp = NonlinearModelFit[F12data[[1 ;; 15]], b + d0 * ax, {b, d0, a}, x, MaxIterations -> 1000]
```

```
FittedModel[0.00134432 + 0.000404047 <<19>>x]
```

```
F12exp["BestFit"]
```

```
0.00134432 + 0.000404047 1.75124x
```

```
Show[ListPlot[F12data[[1 ;; 15]], PlotRange -> All], Plot[F12exp[x], {x, 1, 17}]]
```

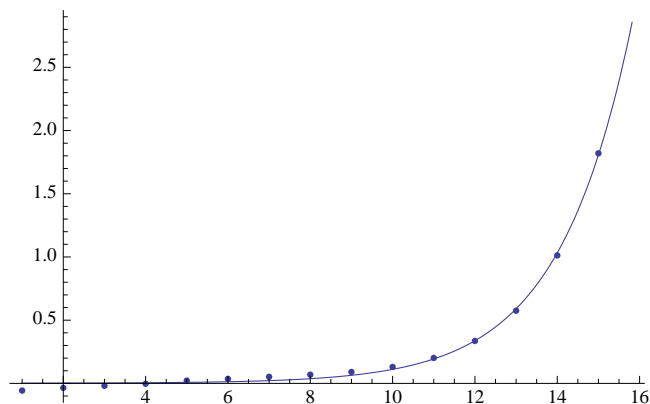

```
F13exp = NonlinearModelFit[F13data[[1 ;; 15]], b + d0 * ax, {b, d0, a}, x, MaxIterations -> 1000]
```

```
FittedModel[0.023234 + 0.00101156 <<19>>x]
```

```
F13exp["BestFit"]
```

```
0.023234 + 0.00101156 1.63668x
```

```
Show[ListPlot[F13data[[1 ;; 15]], PlotRange -> All], Plot[F13exp[x], {x, 1, 17}]]
```

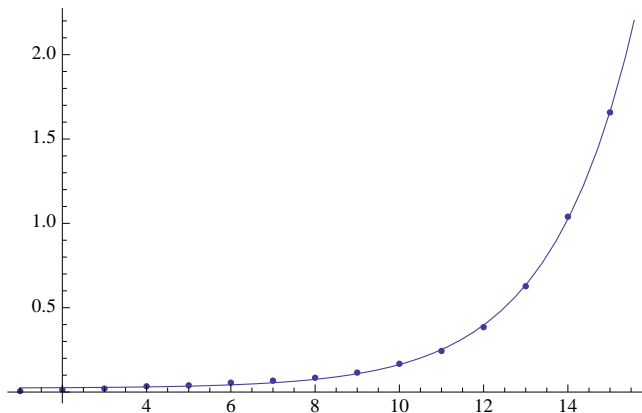

```
F14exp = NonlinearModelFit[F14data[[1 ;; 15]], b + d0 * a^x, {b, d0, a}, x, MaxIterations -> 1000]
```

```
FittedModel[0.00938176 + 0.000466019 <<19>>^x]
```

```
F14exp["BestFit"]
```

```
0.00938176 + 0.000466019 1.69869^x
```

```
Show[ListPlot[F14data[[1 ;; 15]], PlotRange -> All], Plot[F14exp[x], {x, 1, 17}]]
```

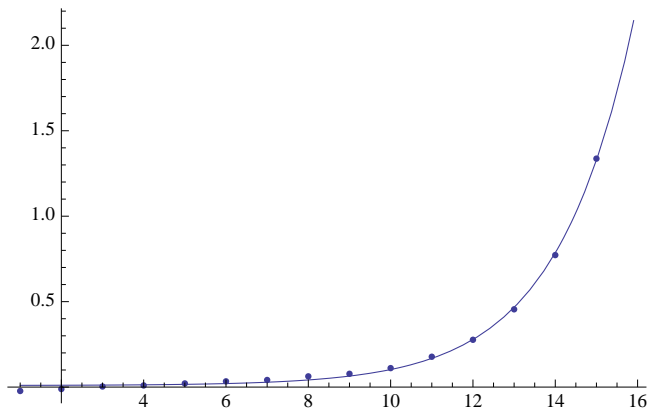

```
F21exp = NonlinearModelFit[F21data[[1 ;; 18]], b + d0 * a^x, {b, d0, a}, x, MaxIterations -> 1000]
```

```
FittedModel[0.0116202 + 0.0000396458 <<15>>^x]
```

```
F21exp["BestFit"]
```

```
0.0116202 + 0.0000396458 1.77338^x
```



```
Show[ListPlot[F21data[[1 ;; 18]], PlotRange -> All], Plot[F21exp[x], {x, 1, 20}]]
```

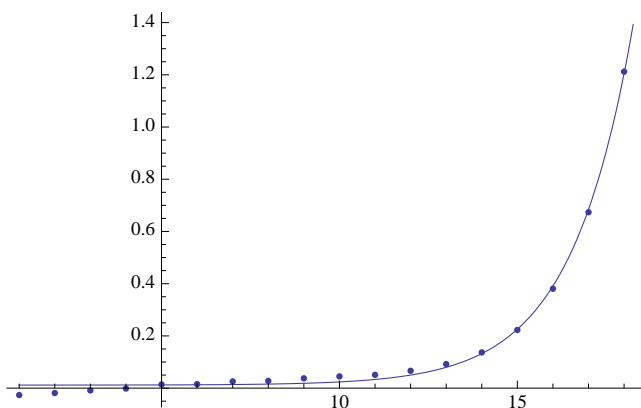

```
F22exp = NonlinearModelFit[F22data[[1 ;; 18]], b + d0 * a^x, {b, d0, a}, x, MaxIterations -> 1000]
```

```
FittedModel [ 0.0115172 + 0.0000431857 <<19>>^x ]
```

```
F22exp["BestFit"]
```

```
0.0115172 + 0.0000431857 1.78057^x
```

```
Show[ListPlot[F22data[[1 ;; 18]], PlotRange -> All], Plot[F22exp[x], {x, 1, 20}]]
```

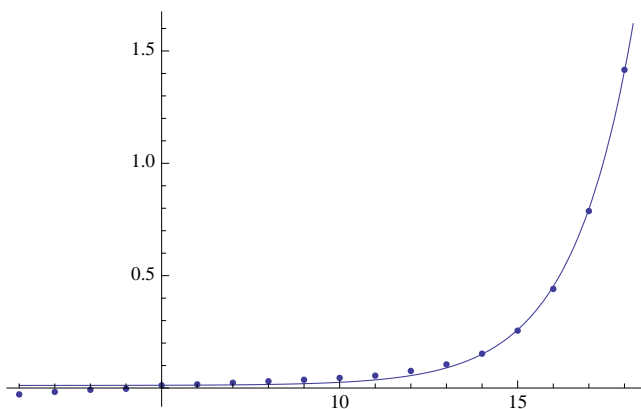

```
F23exp = NonlinearModelFit[F23data[[1 ;; 18]], b + d0 * a^x, {b, d0, a}, x, MaxIterations -> 1000]
```

```
FittedModel [ 0.0251573 + 0.00020661 <<19>>^x ]
```

```
F23exp["BestFit"]
```

```
0.0251573 + 0.00020661 1.64007^x
```

```
Show[ListPlot[F23data[[1 ;; 18]], PlotRange -> All], Plot[F23exp[x], {x, 1, 20}]]
```

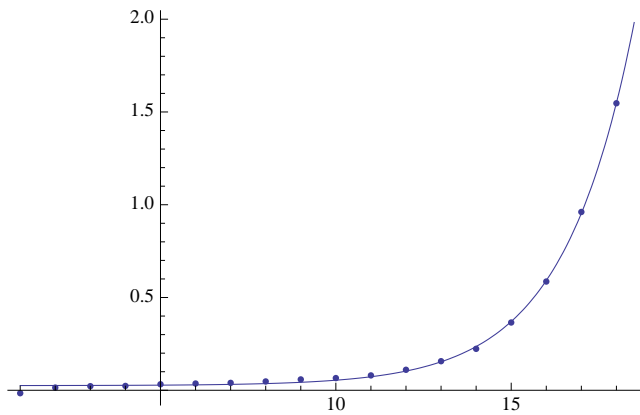

```
F24exp = NonlinearModelFit[F24data[[1 ;; 18]], b + d0 * a^x, {b, d0, a}, x, MaxIterations -> 1000]
```

```
FittedModel [ 0.0187197 + 0.000219314 <<18>>^x ]
```

```
F24exp["BestFit"]
```

```
0.0187197 + 0.000219314 1.67487^x
```

```
Show[ListPlot[F24data[[1 ;; 18]], PlotRange -> All], Plot[F24exp[x], {x, 1, 20}]]
```

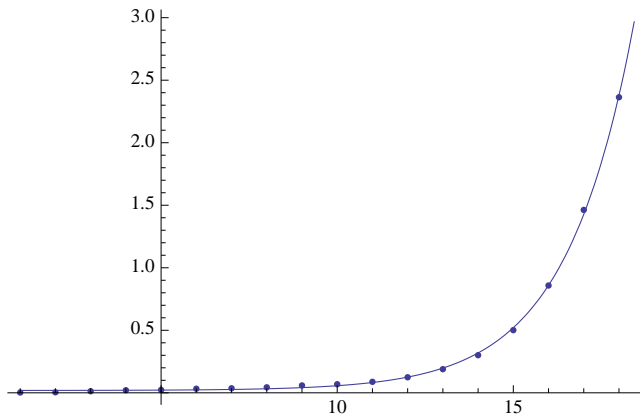

```
F31exp = NonlinearModelFit[F31data[[1 ;; 22]], b + d0 * a^x, {b, d0, a}, x, MaxIterations -> 1000]
```

```
FittedModel [ 0.0189188 + 4.87297 × 10-6 <<19>>^x ]
```

```
F31exp["BestFit"]
```

```
0.0189188 + 4.87297 × 10-6 1.79821^x
```

```
Show[ListPlot[F31data[[1 ;; 22]], PlotRange -> All], Plot[F31exp[x], {x, 1, 25}]]
```

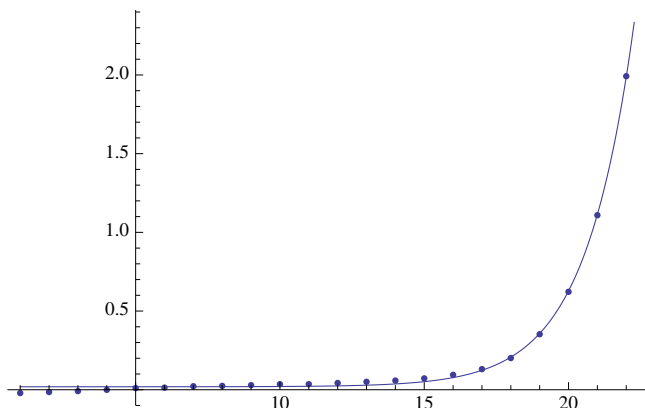

```
F32exp = NonlinearModelFit[F32data[[1 ;; 22]], b + d0 * a^x, {b, d0, a}, x, MaxIterations -> 1000]
```

```
FittedModel[0.0159663 + 5.17298 × 10-6 <<19>>x]
```

```
F32exp["BestFit"]
```

$$0.0159663 + 5.17298 \times 10^{-6} 1.80446^x$$

```
Show[ListPlot[F32data[[1 ;; 22]], PlotRange -> All], Plot[F32exp[x], {x, 1, 25}]]
```

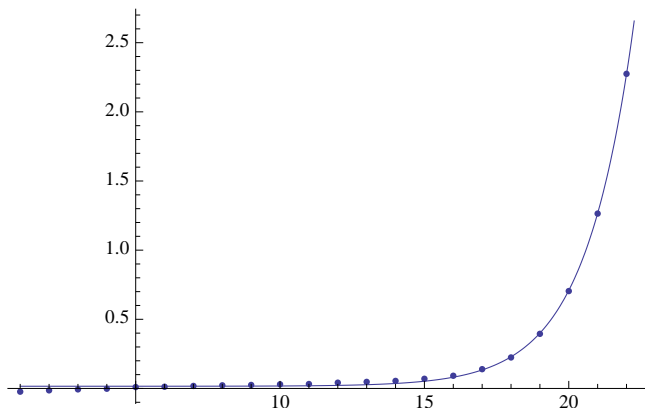

```
F33exp = NonlinearModelFit[F33data[[1 ;; 22]], b + d0 * a^x, {b, d0, a}, x, MaxIterations -> 1000]
```

```
FittedModel[0.0310752 + 0.0000869497 <<19>>x]
```

```
F33exp["BestFit"]
```

$$0.0310752 + 0.0000869497 1.59358^x$$

```
Show[ListPlot[F33data[[1 ;; 22]], PlotRange -> All], Plot[F33exp[x], {x, 1, 25}]]
```

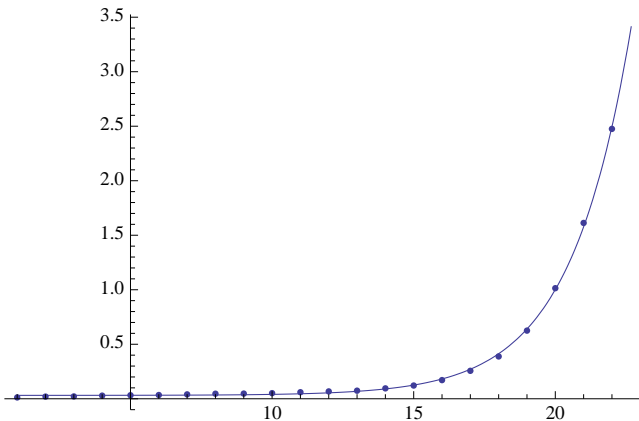

```
F34exp = NonlinearModelFit[F34data[[1 ;; 22]], b + d0 * a^x, {b, d0, a}, x, MaxIterations -> 1000]
```

```
FittedModel[0.0254402 + 0.0000485877 <<19>>^x]
```

```
F34exp["BestFit"]
```

```
0.0254402 + 0.0000485877 1.64621^x
```

```
Show[ListPlot[F34data[[1 ;; 22]], PlotRange -> All], Plot[F34exp[x], {x, 1, 25}]]
```

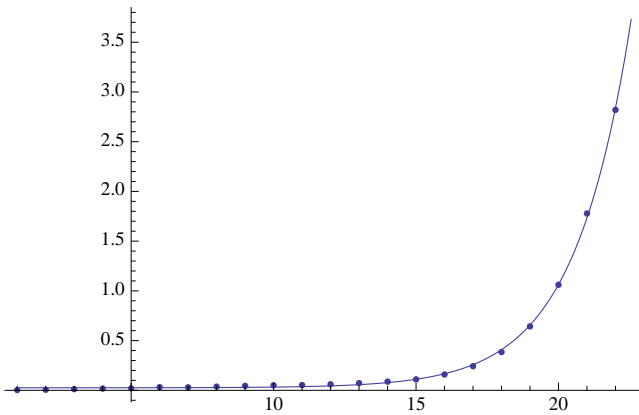

```
F41exp = NonlinearModelFit[F41data[[1 ;; 24]], b + d0 * a^x, {b, d0, a}, x, MaxIterations -> 1000]
```

```
FittedModel[0.0218628 + 1.48735 * 10^-6 <<19>>^x]
```

```
F41exp["BestFit"]
```

```
0.0218628 + 1.48735 * 10^-6 1.74076^x
```

```
Show[ListPlot[F41data[[1 ;; 24]], PlotRange -> All], Plot[F41exp[x], {x, 1, 27}]]
```

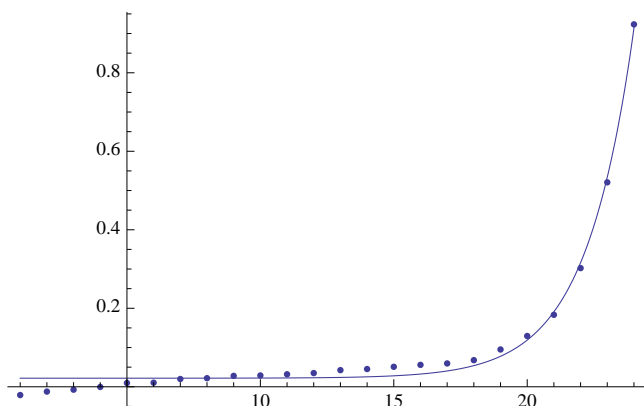

```
F42exp = NonlinearModelFit[F42data[[1 ;; 24]], b + d0 * a^x, {b, d0, a}, x, MaxIterations -> 1000]
```

```
FittedModel [ 0.0247966 + 1.13024 × 10-6 <<18>>x ]
```

```
F42exp["BestFit"]
```

```
0.0247966 + 1.13024 × 10-6 1.77639x
```

```
Show[ListPlot[F42data[[1 ;; 24]], PlotRange -> All], Plot[F42exp[x], {x, 1, 27}]]
```

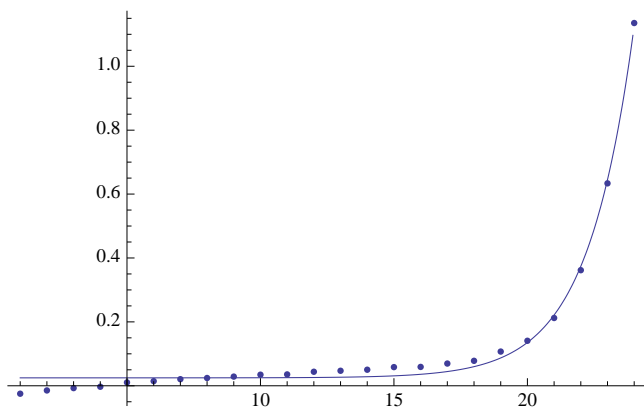

```
F43exp = NonlinearModelFit[F43data[[1 ;; 24]], b + d0 * a^x, {b, d0, a}, x, MaxIterations -> 1000]
```

```
FittedModel [ 0.0408012 + 8.62537 × 10-6 <<19>>x ]
```

```
F43exp["BestFit"]
```

```
0.0408012 + 8.62537 × 10-6 1.62557x
```

```
Show[ListPlot[F43data[[1 ;; 24]], PlotRange -> All], Plot[F43exp[x], {x, 1, 27}]]
```

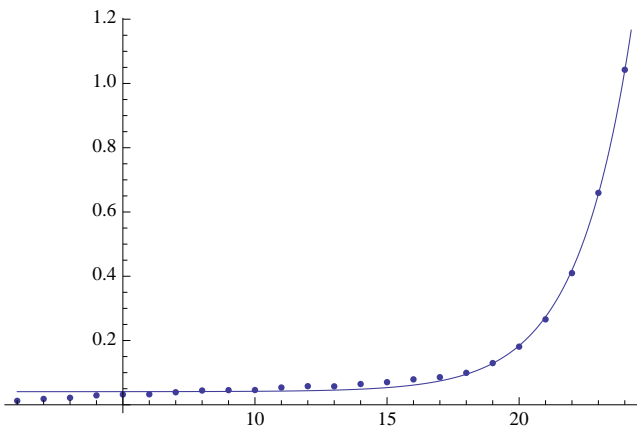

```
F44exp = NonlinearModelFit[F44data[[1 ;; 24]], b + d0 * a^x, {b, d0, a}, x, MaxIterations -> 1000]
```

```
FittedModel [ 0.0378632 + 3.7217 × 10-6 <<19>>x ]
```

```
F44exp["BestFit"]
```

```
0.0378632 + 3.7217 × 10-6 1.69894x
```

```
Show[ListPlot[F44data[[1 ;; 24]], PlotRange -> All], Plot[F44exp[x], {x, 1, 27}]]
```

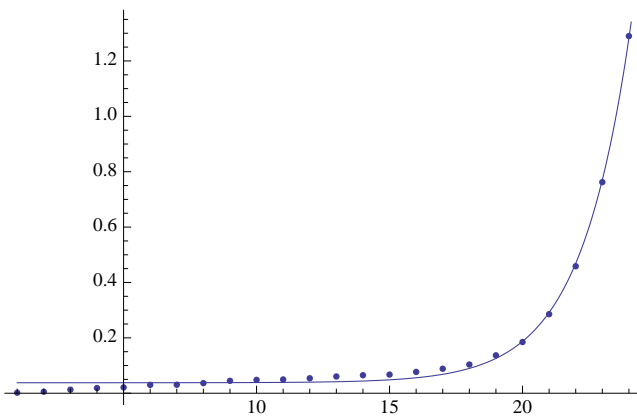

```
F51exp = NonlinearModelFit[F51data[[1 ;; 28]], b + d0 * a^x, {b, d0, a}, x, MaxIterations -> 1000]
```

```
FittedModel [ 0.0299306 + 1.10969 × 10-7 <<19>>x ]
```

```
F51exp["BestFit"]
```

```
0.0299306 + 1.10969 × 10-7 1.80258x
```

```
Show[ListPlot[F51data[[1 ;; 28]], PlotRange -> All], Plot[F51exp[x], {x, 1, 30}]]
```

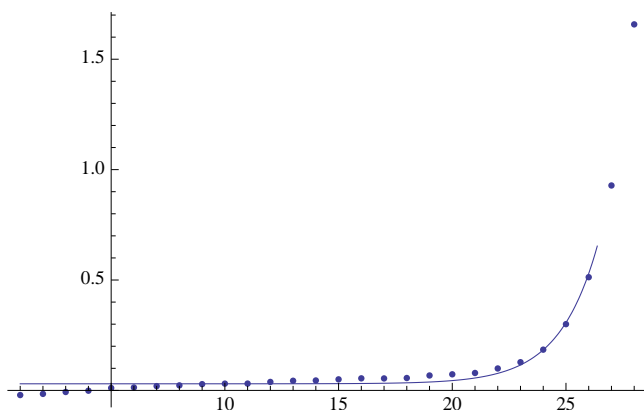

```
F52exp = NonlinearModelFit[F52data[[1 ;; 28]], b + d0 * a^x, {b, d0, a}, x, MaxIterations -> 1000]
```

```
FittedModel[0.0301569 + 1.09252 × 10-7 <<19>>x]
```

```
F52exp["BestFit"]
```

```
0.0301569 + 1.09252 × 10-7 1.80832x
```

```
Show[ListPlot[F52data[[1 ;; 28]], PlotRange -> All], Plot[F52exp[x], {x, 1, 31}]]
```

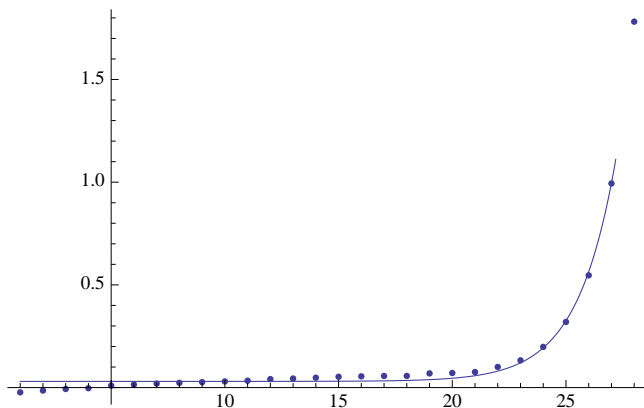

```
F53exp = NonlinearModelFit[F53data[[1 ;; 28]], b + d0 * a^x, {b, d0, a}, x, MaxIterations -> 1000]
```

```
FittedModel[0.0449902 + 2.02889 × 10-6 <<19>>x]
```

```
F53exp["BestFit"]
```

```
0.0449902 + 2.02889 × 10-6 1.62525x
```

```
Show[ListPlot[F53data[[1 ;; 28]], PlotRange -> All], Plot[F53exp[x], {x, 1, 31}]]
```

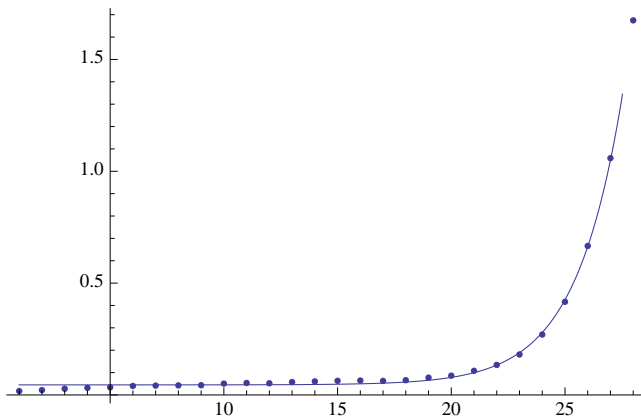

```
F54exp = NonlinearModelFit[F54data[[1 ;; 28]], b+d0*a^x, {b, d0, a}, x, MaxIterations -> 1000]
```

```
FittedModel[0.0398918 + 6.62153 × 10-7 <<19>>x]
```

```
F54exp["BestFit"]
```

```
0.0398918 + 6.62153 × 10-7 1.68975x
```

```
Show[ListPlot[F54data[[1 ;; 28]], PlotRange -> All], Plot[F54exp[x], {x, 1, 31}]]
```

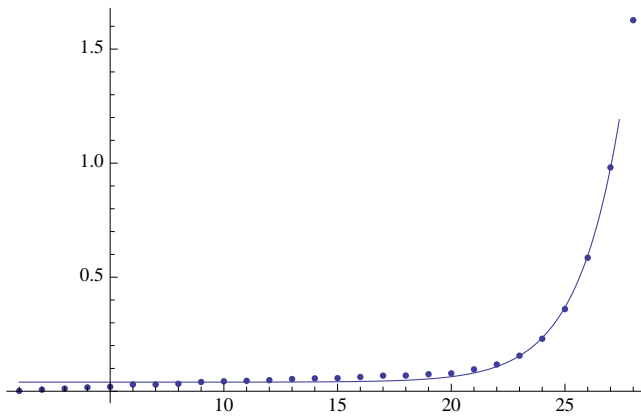

```
F61exp = NonlinearModelFit[F61data[[1 ;; 31]], b+d0*a^x, {b, d0, a}, x, MaxIterations -> 1000]
```

```
FittedModel[0.0347957 + 2.00307 × 10-8 <<19>>x]
```

```
F61exp["BestFit"]
```

```
0.0347957 + 2.00307 × 10-8 1.78157x
```



```
Show[ListPlot[F61data[[1 ;; 31]], PlotRange -> All], Plot[F61exp[x], {x, 1, 35}]]
```

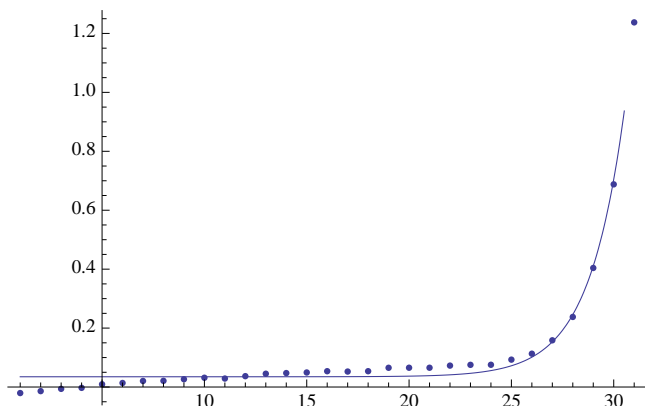

```
F62exp = NonlinearModelFit[F62data[[1 ;; 31]], b + d0 * a^x, {b, d0, a}, x, MaxIterations -> 1000]
```

```
FittedModel [ 0.037815 + 1.88923 × 10-8 <<19>>x ]
```

```
F62exp["BestFit"]
```

$$0.037815 + 1.88923 \times 10^{-8} 1.79139^x$$

```
Show[ListPlot[F62data[[1 ;; 31]], PlotRange -> All], Plot[F62exp[x], {x, 1, 35}]]
```

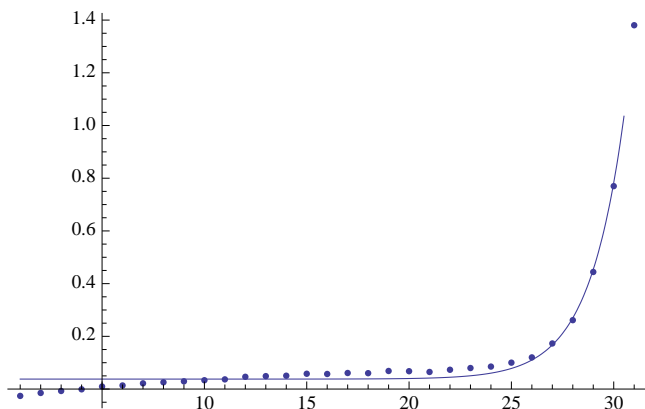

```
F63exp = NonlinearModelFit[F63data[[1 ;; 31]], b + d0 * a^x, {b, d0, a}, x, MaxIterations -> 1000]
```

```
FittedModel [ 0.0497411 + 3.7214 × 10-7 <<19>>x ]
```

```
F63exp["BestFit"]
```

$$0.0497411 + 3.7214 \times 10^{-7} 1.61823^x$$

```
Show[ListPlot[F63data[[1 ;; 31]], PlotRange -> All], Plot[F63exp[x], {x, 1, 35}]]
```

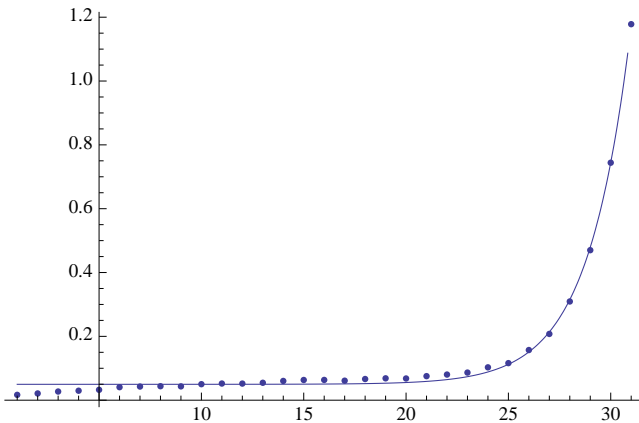

```
F64exp = NonlinearModelFit[F64data[[1 ;; 31]], b + d0 * a^x, {b, d0, a}, x, MaxIterations -> 1000]
```

```
FittedModel[0.0488819 + 1.00182 × 10-7 <<19>>x]
```

```
F64exp["BestFit"]
```

```
0.0488819 + 1.00182 × 10-7 1.69067x
```

```
Show[ListPlot[F64data[[1 ;; 31]], PlotRange -> All], Plot[F64exp[x], {x, 1, 35}]]
```

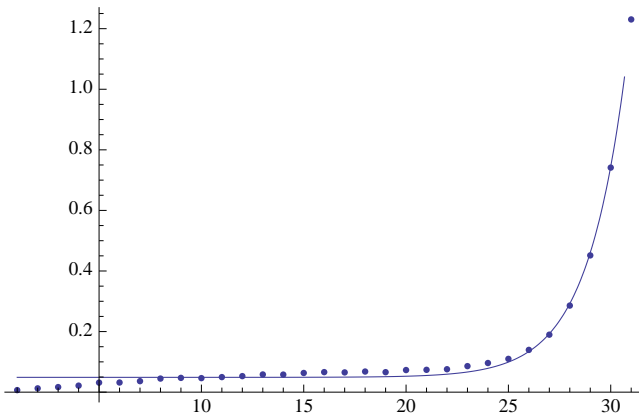

```
F71exp = NonlinearModelFit[F71data[[1 ;; 39]], b + d0 * a^x, {b, d0, a}, x, MaxIterations -> 1000]
```

```
FittedModel[0.0466201 + 2.5351 × 10-10 <<19>>x]
```

```
F71exp["BestFit"]
```

```
0.0466201 + 2.5351 × 10-10 1.76705x
```

```
Show[ListPlot[F71data[[1 ;; 39]], PlotRange -> All], Plot[F71exp[x], {x, 1, 46}]]
```

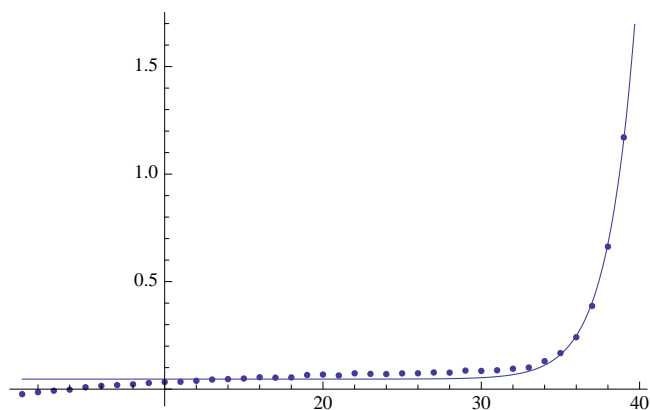

```
F72exp = NonlinearModelFit[F72data[[1 ;; 39]], b + d0 * a^x, {b, d0, a}, x, MaxIterations -> 1000]
```

```
FittedModel [ 0.0495575 + 2.2596 × 10-10 <<18>>x ]
```

```
F72exp["BestFit"]
```

```
0.0495575 + 2.2596 × 10-10 1.77982x
```

```
Show[ListPlot[F72data[[1 ;; 39]], PlotRange -> All], Plot[F72exp[x], {x, 1, 46}]]
```

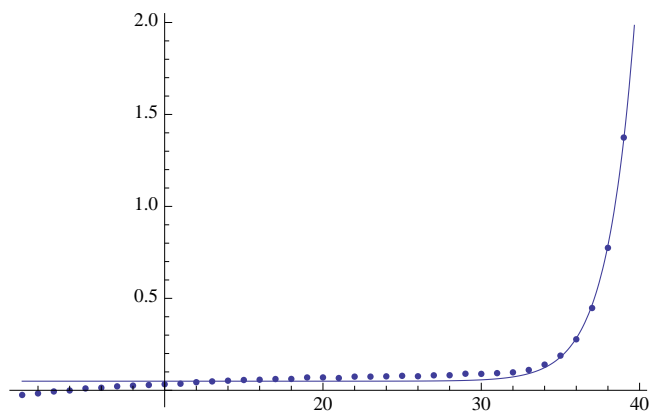

```
F73exp = NonlinearModelFit[F73data[[1 ;; 39]], b + d0 * a^x, {b, d0, a}, x, MaxIterations -> 1000]
```

```
FittedModel [ 0.0607448 + 2.18005 × 10-8 <<19>>x ]
```

```
F73exp["BestFit"]
```

```
0.0607448 + 2.18005 × 10-8 1.56834x
```

```
Show[ListPlot[F73data[[1 ;; 39]], PlotRange -> All], Plot[F73exp[x], {x, 1, 46}]]
```

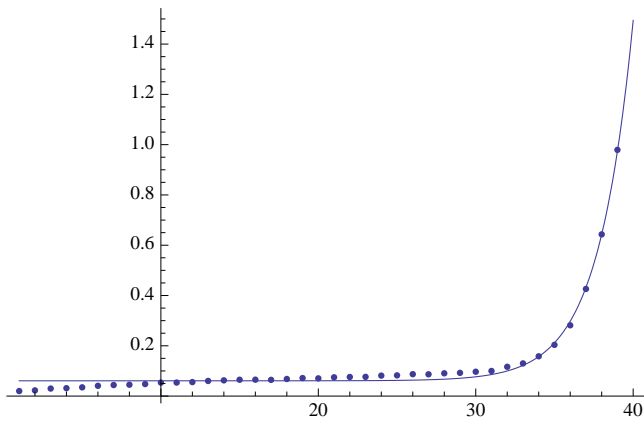

```
F74exp = NonlinearModelFit[F74data[[1 ;; 39]], b + d0 * a^x, {b, d0, a}, x, MaxIterations -> 1000]
```

```
FittedModel[0.0568989 + 4.85376 × 10-9 <<19>>x]
```

```
F74exp["BestFit"]
```

```
0.0568989 + 4.85376 × 10-9 1.64168x
```

```
Show[ListPlot[F74data[[1 ;; 39]], PlotRange -> All], Plot[F74exp[x], {x, 1, 46}]]
```

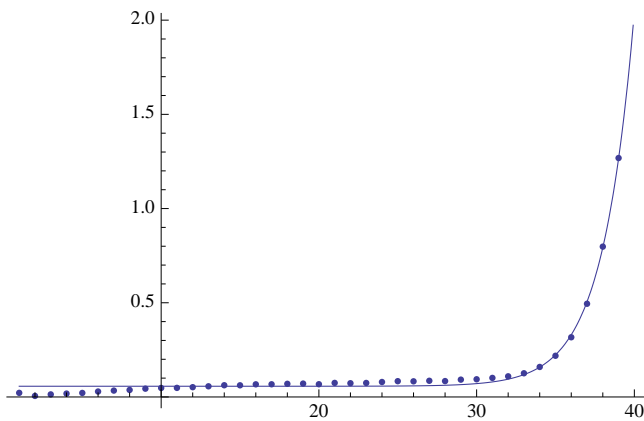

Supplement: pone.0012355.s007.pdf [file pone.0012355.s007.pdf]
